# Supplementary material for: Cyclometalated C^N diphosphine ruthenium catalysts for Oppenauer-type oxidation/transfer hydrogenation reactions and cytotoxic activity
Source: Royal Society of Chemistry journal article supplement (doi:10.1039/d3cy00676j), 2023-01-01
Supplement: d3cy00676j1.pdf [file d3cy00676j1.pdf]

**Cyclometallated C<sup>^</sup>N Diphosphine Ruthenium Catalysts for Oppenauer-Type Oxidation /  
Transfer Hydrogenation Reactions and Cytotoxic Activity**

Dario Alessi,<sup>a</sup> Pierfrancesco del Mestre,<sup>b</sup> Eleonora Aneggi,<sup>a</sup> Maurizio Ballico,<sup>a</sup> Antonio P. Beltrami<sup>b</sup>,  
Marta Busato,<sup>a</sup> Daniela Cesselli,<sup>b</sup> Alexandra Heidecker,<sup>c</sup> Daniele Zuccaccia,<sup>a</sup> and Walter Baratta<sup>a\*</sup>

<sup>a</sup> *Dipartimento di Scienze Agroalimentari, Ambientali e Animali, Università di Udine, Via Cotonificio  
108, I-33100 Udine, Italy*

<sup>b</sup> *Dipartimento di Area Medica – Istituto di Genetica Medica, Università di Udine, Via Chiusaforte, F3,  
I-33100 Udine, Italy*

<sup>c</sup> *Inorganic Chemistry/Molecular Catalysis, Department of Chemistry & Catalysis Research Center,  
TUM, Lichtenbergstraße 4, 85747 Garching b. München, Germany*

**Supporting Information**

**Table of Contents:**

|                                                                                                                                                      |          |
|------------------------------------------------------------------------------------------------------------------------------------------------------|----------|
| <b>Scheme S1.</b> NMR numbering scheme of the C <sup>^</sup> N ligands <b>a-d</b> in the [Ru(C <sup>^</sup> N)(η <sup>2</sup> -OAc)(dppb)] complexes | Pag. S7  |
| <b>Figure S1.</b> <sup>31</sup> P{ <sup>1</sup> H} NMR spectrum of [Ru( <b>a</b> )(η <sup>2</sup> -OAc)(dppb)] ( <b>1</b> )                          | Pag. S7  |
| <b>Figure S2.</b> <sup>1</sup> H NMR spectrum of [Ru( <b>a</b> )(η <sup>2</sup> -OAc)(dppb)] ( <b>1</b> )                                            | Pag. S8  |
| <b>Figure S3.</b> <sup>13</sup> C{ <sup>1</sup> H} DEPTQ NMR spectrum of [Ru( <b>a</b> )(η <sup>2</sup> -OAc)(dppb)] ( <b>1</b> )                    | Pag. S9  |
| <b>Figure S4.</b> <sup>1</sup> H- <sup>1</sup> H COSY 2D NMR spectrum of [Ru( <b>a</b> )(η <sup>2</sup> -OAc)(dppb)] ( <b>1</b> )                    | Pag. S10 |
| <b>Figure S5.</b> <sup>1</sup> H- <sup>1</sup> H NOESY 2D NMR spectrum of [Ru( <b>a</b> )(η <sup>2</sup> -OAc)(dppb)] ( <b>1</b> )                   | Pag. S11 |
| <b>Figure S6.</b> <sup>1</sup> H- <sup>31</sup> P HMBC 2D NMR spectrum of [Ru( <b>a</b> )(η <sup>2</sup> -OAc)(dppb)] ( <b>1</b> )                   | Pag. S12 |

|                                                                                                                                         |          |
|-----------------------------------------------------------------------------------------------------------------------------------------|----------|
| <b>Figure S7.</b> $^1\text{H}$ - $^{13}\text{C}$ HMBC 2D NMR spectrum of $[\text{Ru}(\mathbf{a})(\eta^2\text{-OAc})(\text{dppb})]$ (1)  | Pag. S13 |
| <b>Figure S8.</b> $^1\text{H}$ - $^{13}\text{C}$ HSQC 2D NMR spectrum of $[\text{Ru}(\mathbf{a})(\eta^2\text{-OAc})(\text{dppb})]$ (1)  | Pag. S14 |
| <b>Figure S9.</b> $^{31}\text{P}\{^1\text{H}\}$ NMR spectrum of $[\text{Ru}(\mathbf{b})(\eta^2\text{-OAc})(\text{dppb})]$ (2)           | Pag. S15 |
| <b>Figure S10.</b> $^1\text{H}$ NMR spectrum of $[\text{Ru}(\mathbf{b})(\eta^2\text{-OAc})(\text{dppb})]$ (2)                           | Pag. S16 |
| <b>Figure S11.</b> $^{13}\text{C}\{^1\text{H}\}$ DEPTQ NMR spectrum of $[\text{Ru}(\mathbf{b})(\eta^2\text{-OAc})(\text{dppb})]$ (2)    | Pag. S17 |
| <b>Figure S12.</b> $^1\text{H}$ - $^1\text{H}$ COSY 2D NMR spectrum of $[\text{Ru}(\mathbf{b})(\eta^2\text{-OAc})(\text{dppb})]$ (2)    | Pag. S18 |
| <b>Figure S13.</b> $^1\text{H}$ - $^1\text{H}$ NOESY 2D NMR spectrum of $[\text{Ru}(\mathbf{b})(\eta^2\text{-OAc})(\text{dppb})]$ (2)   | Pag. S19 |
| <b>Figure S14.</b> $^1\text{H}$ - $^{31}\text{P}$ HMBC 2D NMR spectrum of $[\text{Ru}(\mathbf{b})(\eta^2\text{-OAc})(\text{dppb})]$ (2) | Pag. S20 |
| <b>Figure S15.</b> $^1\text{H}$ - $^{13}\text{C}$ HSQC 2D NMR spectrum of $[\text{Ru}(\mathbf{b})(\eta^2\text{-OAc})(\text{dppb})]$ (2) | Pag. S21 |
| <b>Figure S16.</b> $^{31}\text{P}\{^1\text{H}\}$ NMR spectrum of $[\text{Ru}(\mathbf{c})(\eta^2\text{-OAc})(\text{dppb})]$ (3)          | Pag. S22 |
| <b>Figure S17.</b> $^1\text{H}$ NMR spectrum of $[\text{Ru}(\mathbf{c})(\eta^2\text{-OAc})(\text{dppb})]$ (3)                           | Pag. S23 |
| <b>Figure S18.</b> $^{13}\text{C}\{^1\text{H}\}$ DEPTQ NMR spectrum of $[\text{Ru}(\mathbf{c})(\eta^2\text{-OAc})(\text{dppb})]$ (3)    | Pag. S24 |
| <b>Figure S19.</b> $^1\text{H}$ - $^1\text{H}$ COSY 2D NMR spectrum of $[\text{Ru}(\mathbf{c})(\eta^2\text{-OAc})(\text{dppb})]$ (3)    | Pag. S25 |
| <b>Figure S20.</b> $^1\text{H}$ - $^1\text{H}$ NOESY 2D NMR spectrum of $[\text{Ru}(\mathbf{c})(\eta^2\text{-OAc})(\text{dppb})]$ (3)   | Pag. S26 |
| <b>Figure S21.</b> $^1\text{H}$ - $^{31}\text{P}$ HMBC 2D NMR spectrum of $[\text{Ru}(\mathbf{c})(\eta^2\text{-OAc})(\text{dppb})]$ (3) | Pag. S27 |
| <b>Figure S22.</b> $^1\text{H}$ - $^{31}\text{C}$ HMBC 2D NMR spectrum of $[\text{Ru}(\mathbf{c})(\eta^2\text{-OAc})(\text{dppb})]$ (3) | Pag. S28 |
| <b>Figure S23.</b> $^1\text{H}$ - $^{13}\text{C}$ HSQC 2D NMR spectrum of $[\text{Ru}(\mathbf{c})(\eta^2\text{-OAc})(\text{dppb})]$ (3) | Pag. S29 |
| <b>Figure S24.</b> $^{31}\text{P}\{^1\text{H}\}$ NMR spectrum of $[\text{Ru}(\mathbf{d})(\eta^2\text{-OAc})(\text{dppb})]$ (4)          | Pag. S30 |
| <b>Figure S25.</b> $^1\text{H}$ NMR spectrum of $[\text{Ru}(\mathbf{d})(\eta^2\text{-OAc})(\text{dppb})]$ (4)                           | Pag. S31 |
| <b>Figure S26.</b> $^{13}\text{C}\{^1\text{H}\}$ DEPTQ NMR spectrum of $[\text{Ru}(\mathbf{d})(\eta^2\text{-OAc})(\text{dppb})]$ (4)    | Pag. S32 |
| <b>Figure S27.</b> $^1\text{H}$ - $^1\text{H}$ COSY 2D NMR spectrum of $[\text{Ru}(\mathbf{d})(\eta^2\text{-OAc})(\text{dppb})]$ (4)    | Pag. S33 |
| <b>Figure S28.</b> $^1\text{H}$ - $^1\text{H}$ NOESY 2D NMR spectrum of $[\text{Ru}(\mathbf{d})(\eta^2\text{-OAc})(\text{dppb})]$ (4)   | Pag. S34 |
| <b>Figure S29.</b> $^1\text{H}$ - $^{31}\text{P}$ HMBC 2D NMR spectrum of $[\text{Ru}(\mathbf{d})(\eta^2\text{-OAc})(\text{dppb})]$ (4) | Pag. S35 |
| <b>Figure S30.</b> $^1\text{H}$ - $^{31}\text{C}$ HMBC 2D NMR spectrum of $[\text{Ru}(\mathbf{d})(\eta^2\text{-OAc})(\text{dppb})]$ (4) | Pag. S36 |
| <b>Figure S31.</b> $^1\text{H}$ - $^{13}\text{C}$ HSQC 2D NMR spectrum of $[\text{Ru}(\mathbf{d})(\eta^2\text{-OAc})(\text{dppb})]$ (4) | Pag. S37 |

|                                                                                                                                                                                                                                                                                                       |          |
|-------------------------------------------------------------------------------------------------------------------------------------------------------------------------------------------------------------------------------------------------------------------------------------------------------|----------|
| <b>Figure S32.</b> $^{31}\text{P}\{^1\text{H}\}$ NMR spectrum of $[\text{Ru}(\mathbf{b})(\eta^2\text{-HCOO})(\text{dppb})]$ ( <b>5</b> )                                                                                                                                                              | Pag. S38 |
| <b>Figure S33.</b> $^1\text{H}$ NMR spectrum of $[\text{Ru}(\mathbf{b})(\eta^2\text{-HCOO})(\text{dppb})]$ ( <b>5</b> )                                                                                                                                                                               | Pag. S39 |
| <b>Figure S34.</b> $^{13}\text{C}\{^1\text{H}\}$ DEPTQ NMR spectrum of $[\text{Ru}(\mathbf{b})(\eta^2\text{-HCOO})(\text{dppb})]$ ( <b>5</b> )                                                                                                                                                        | Pag. S40 |
| <b>Figure S35.</b> $^1\text{H}$ - $^1\text{H}$ COSY 2D NMR spectrum of $[\text{Ru}(\mathbf{b})(\eta^2\text{-HCOO})(\text{dppb})]$ ( <b>5</b> )                                                                                                                                                        | Pag. S41 |
| <b>Figure S36.</b> $^1\text{H}$ - $^{31}\text{P}$ HMBC 2D NMR spectrum of $[\text{Ru}(\mathbf{b})(\eta^2\text{-HCOO})(\text{dppb})]$ ( <b>5</b> )                                                                                                                                                     | Pag. S42 |
| <b>Figure S37.</b> $^1\text{H}$ - $^{13}\text{C}$ HMBC 2D NMR spectrum of $[\text{Ru}(\mathbf{b})(\eta^2\text{-HCOO})(\text{dppb})]$ ( <b>5</b> )                                                                                                                                                     | Pag. S43 |
| <b>Figure S38.</b> $^1\text{H}$ - $^{13}\text{C}$ HSQC 2D NMR spectrum of $[\text{Ru}(\mathbf{b})(\eta^2\text{-HCOO})(\text{dppb})]$ ( <b>5</b> )                                                                                                                                                     | Pag. S44 |
| <b>Figure S39.</b> Evidence of $\text{H}_2$ formation from the decomposition of $\text{HCOOH}$ promoted by $[\text{Ru}(\mathbf{b})(\eta^2\text{-OAc})(\text{dppb})]$ ( <b>2</b> ) in the $^1\text{H}$ NMR spectra (400.1 MHz) in toluene- $d^8$                                                       | Pag. S45 |
| <b>Figure S40.</b> Evidence of formation of ruthenium monohydride species after treatment of $[\text{Ru}(\mathbf{d})(\eta^2\text{-OAc})(\text{dppb})]$ ( <b>4</b> ) with $\text{NaO}i\text{Pr}$ (2 equiv) at reflux in the $^1\text{H}$ NMR spectrum in $i\text{PrOH}/\text{toluene-}d^8$ (4:1 (v/v)) | Pag. S46 |
| <b>Figure S41.</b> GC-FID chromatogram of the reaction mixture of the catalytic TH of 4'-methylacetophenone promoted by complex <b>3</b>                                                                                                                                                              | Pag. S47 |
| <b>Figure S42.</b> GC-FID chromatogram of the reaction mixture of the catalytic TH of 2'-methylacetophenone promoted by complex <b>3</b>                                                                                                                                                              | Pag. S48 |
| <b>Figure S43.</b> GC-FID chromatogram of the reaction mixture of the catalytic Oppenauer-type oxidation of <i>rac</i> - $\alpha$ -tetralol promoted by complex <b>1</b>                                                                                                                              | Pag. S49 |
| <b>General Procedure for the Oppenauer-type oxidation of secondary alcohols</b>                                                                                                                                                                                                                       | Pag. S50 |
| <b>Figure S44.</b> $^1\text{H}$ NMR spectrum of $\alpha$ -tetralone obtained from catalytic <i>Oppenauer</i> -type oxidation of $\alpha$ -tetralol                                                                                                                                                    | Pag. S53 |
| <b>Figure S45.</b> $^{13}\text{C}\{^1\text{H}\}$ DEPTQ NMR spectrum of $\alpha$ -tetralone obtained from catalytic <i>Oppenauer</i> -type oxidation of $\alpha$ -tetralol                                                                                                                             | Pag. S54 |
| <b>Figure S46.</b> $^1\text{H}$ NMR spectrum of benzophenone obtained from catalytic <i>Oppenauer</i> -type oxidation of benzhydrol                                                                                                                                                                   | Pag. S55 |

- Figure S47.**  $^{13}\text{C}\{^1\text{H}\}$  DEPTQ NMR spectrum of benzophenone obtained from catalytic *Oppenauer*-type oxidation of benzhydrol Pag. S56
- Figure S48.**  $^1\text{H}$  NMR spectrum of 4'-methylacetophenone obtained from catalytic *Oppenauer*-type oxidation of 1-(*p*-tolyl)ethanol Pag. S57
- Figure S49.**  $^{13}\text{C}\{^1\text{H}\}$  DEPTQ NMR spectrum of 4'-methylacetophenone obtained from catalytic *Oppenauer*-type oxidation of 1-(*p*-tolyl)ethanol Pag. S58
- Figure S50.**  $^1\text{H}$  NMR spectrum of propiophenone obtained from catalytic *Oppenauer*-type oxidation of 1-phenyl-1-propanol Pag. S59
- Figure S51.**  $^{13}\text{C}\{^1\text{H}\}$  DEPTQ NMR spectrum of propiophenone obtained from catalytic *Oppenauer*-type oxidation of 1-phenyl-1-propanol Pag. S60
- Figure S52.**  $^1\text{H}$  NMR spectrum of 2-heptanone obtained from catalytic *Oppenauer*-type oxidation of 2-heptanol Pag. S61
- Figure S53.**  $^{13}\text{C}\{^1\text{H}\}$  DEPTQ NMR spectrum of 2-heptanone obtained from catalytic *Oppenauer*-type oxidation of 2-heptanol Pag. S62
- Figure S54.**  $^1\text{H}$  NMR spectrum of (1*R*)-(+)-camphor obtained from catalytic *Oppenauer*-type oxidation of (1*R*)-(+)-borneol Pag. S63
- Figure S55.**  $^{13}\text{C}\{^1\text{H}\}$  DEPTQ NMR spectrum of (1*R*)-(+)-camphor obtained from catalytic *Oppenauer*-type oxidation of (1*R*)-(+)-borneol Pag. S64
- General Procedure for the catalytic transfer hydrogenation (TH) of carbonyl compounds** Pag. S65
- Figure S56.**  $^1\text{H}$  NMR spectrum of 1-Phenylethanol obtained from catalytic TH of acetophenone Pag. S68
- Figure S57.**  $^{13}\text{C}\{^1\text{H}\}$  DEPTQ NMR spectrum of 1-Phenylethanol obtained from catalytic TH of acetophenone Pag. S69
- Figure S58.**  $^1\text{H}$  NMR spectrum of 1-(*o*-tolyl)ethanol obtained from catalytic TH of 2'-methylacetophenone Pag. S70

- Figure S59.**  $^{13}\text{C}\{^1\text{H}\}$  DEPTQ NMR spectrum of 1-(*o*-tolyl)ethanol obtained from catalytic TH of 2'-methylacetophenone Pag. S71
- Figure S60.**  $^1\text{H}$  NMR spectrum (400.1 MHz) of 1-(*p*-tolyl)ethanol obtained from catalytic TH of 4'-methylacetophenone Pag. S72
- Figure S61.**  $^{13}\text{C}\{^1\text{H}\}$  DEPTQ NMR spectrum of 1-(*p*-tolyl)ethanol obtained from catalytic TH of 4'-methylacetophenone Pag. S73
- Figure S62.**  $^1\text{H}$  NMR spectrum of 1-(2'-methoxy-phenyl)ethanol obtained from catalytic TH of 2'-methoxyacetophenone Pag. S74
- Figure S63.**  $^{13}\text{C}\{^1\text{H}\}$  DEPTQ NMR spectrum of 1-(2'-methoxy-phenyl)ethanol obtained from catalytic TH of 2'-methoxyacetophenone Pag. S75
- Figure S64.**  $^1\text{H}$  NMR spectrum of benzhydrol obtained from catalytic TH of benzophenone Pag. S76
- Figure S65.**  $^{13}\text{C}\{^1\text{H}\}$  DEPTQ NMR spectrum of benzhydrol obtained from catalytic TH of benzophenone Pag. S77
- Figure S66.**  $^1\text{H}$  NMR spectrum of cyclohexanol obtained from catalytic TH of cyclohexanone Pag. S78
- Figure S67.**  $^{13}\text{C}\{^1\text{H}\}$  DEPTQ NMR spectrum of cyclohexanol obtained from catalytic TH of cyclohexanone Pag. S79
- Figure S68.**  $^1\text{H}$  NMR spectrum of benzyl alcohol obtained from catalytic TH of benzaldehyde Pag. S80
- Figure S69.**  $^{13}\text{C}\{^1\text{H}\}$  DEPTQ NMR spectrum of benzyl alcohol obtained from catalytic TH of benzaldehyde Pag. S81
- Single Crystal X-Ray Structure Determination of Compounds 1-4 (CCDC 2253558-2253561).**
- General Data** Pag. S82
- Figure S70.** ORTEP style plot of compound **1** in the solid state (CCDC 2253559) Pag. S83
- Single Crystal X-Ray Structure Determination of Compound 1 (CCDC 2253559). Detailed**

|                                                                                                                                                           |          |
|-----------------------------------------------------------------------------------------------------------------------------------------------------------|----------|
| <b>Crystallographic Data</b>                                                                                                                              | Pag. S84 |
| <b>Figure S71.</b> ORTEP style plot of compound <b>2</b> in the solid state (CCDC 2253561)                                                                | Pag. S86 |
| <b>Single Crystal X-Ray Structure Determination of Compound 2 (CCDC 2253561). Detailed Crystallographic Data</b>                                          | Pag. S87 |
| <b>Figure S72.</b> ORTEP style plot of compound <b>3</b> in the solid state (CCDC 2253560)                                                                | Pag. S89 |
| <b>Single Crystal X-Ray Structure Determination of Compound 3 (CCDC 2253560). Detailed Crystallographic Data</b>                                          | Pag. S90 |
| <b>Figure S73.</b> ORTEP style plot of compound <b>4</b> in the solid state (CCDC 2253558)                                                                | Pag. S92 |
| <b>Single Crystal X-Ray Structure Determination of Compound 4 (CCDC 2253558). Detailed Crystallographic Data</b>                                          | Pag. S93 |
| <b>Figure S74.</b> Cell viability measured by MTT assay of Astrocytes ( <b>A</b> ) and U87 MG cells ( <b>B</b> ) treated with Temozolomide (TMZ) for 72 h | Pag. S95 |
| <b>References</b>                                                                                                                                         | Pag. S96 |

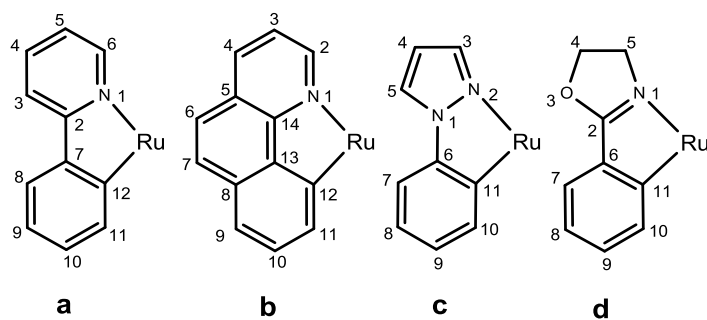

**Scheme S1:** C<sup>N</sup> ligands a-d in the [Ru(C<sup>N</sup>)(η<sup>2</sup>-OAc)(dppb)] complexes.

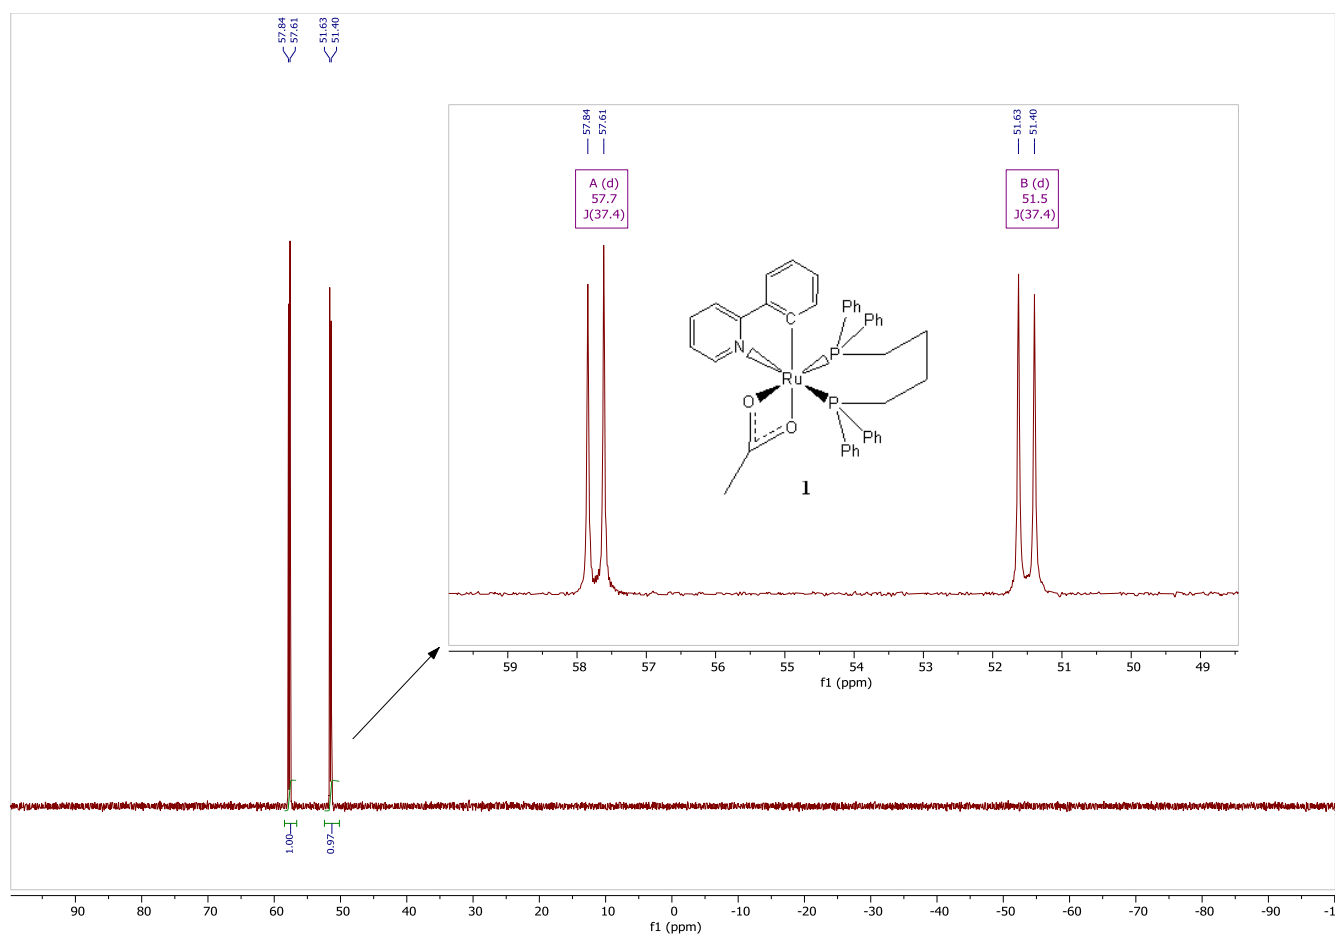

**Figure S1.** <sup>31</sup>P{<sup>1</sup>H} NMR spectrum (162.0 MHz) of [Ru(a)(η<sup>2</sup>-OAc)(dppb)] (1) in CD<sub>2</sub>Cl<sub>2</sub> at 25 °C.

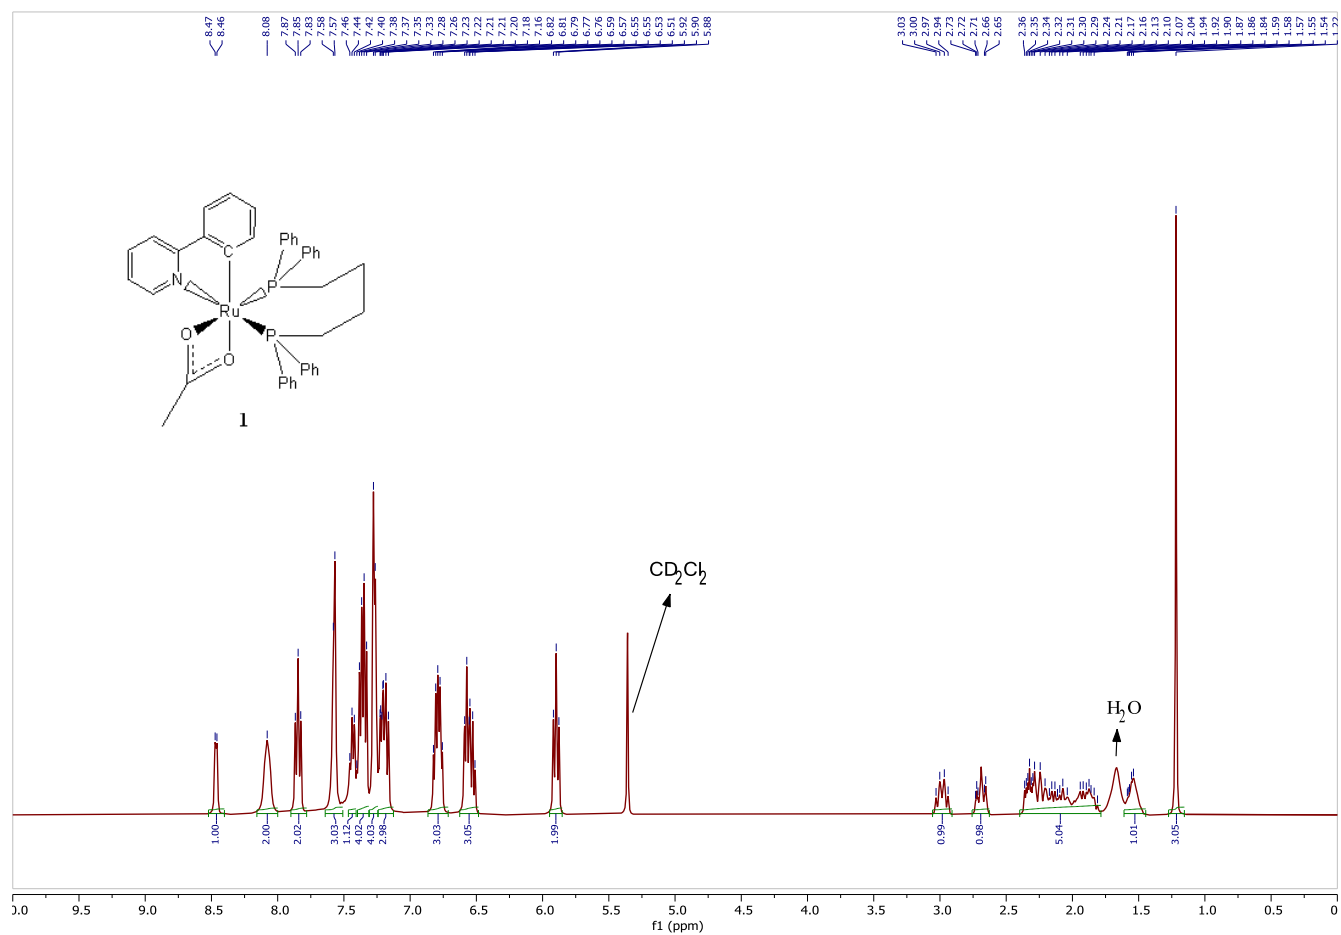

**Figure S2.**  $^1\text{H}$  NMR spectrum (400.1 MHz) of  $[\text{Ru}(\text{a})(\eta^2\text{-OAc})(\text{dppb})]$  (**1**) in  $\text{CD}_2\text{Cl}_2$  at 25 °C.



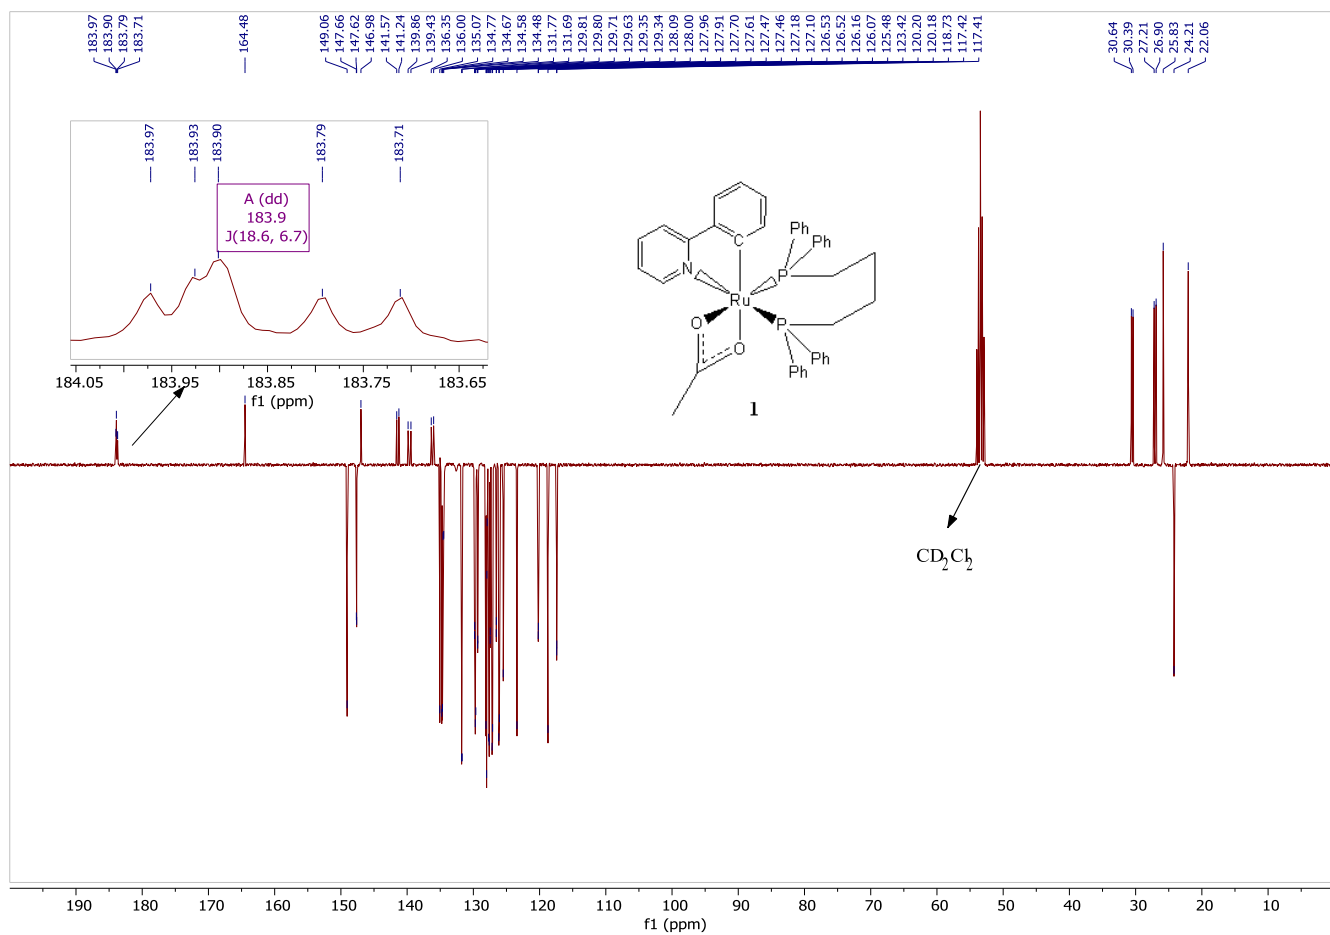

**Figure S3.**  $^{13}\text{C}\{^1\text{H}\}$  DEPTQ NMR spectrum (100.6 MHz) of  $[\text{Ru}(\text{a})(\eta^2\text{-OAc})(\text{dppb})]$  (**1**) in  $\text{CD}_2\text{Cl}_2$  at 25 °C.

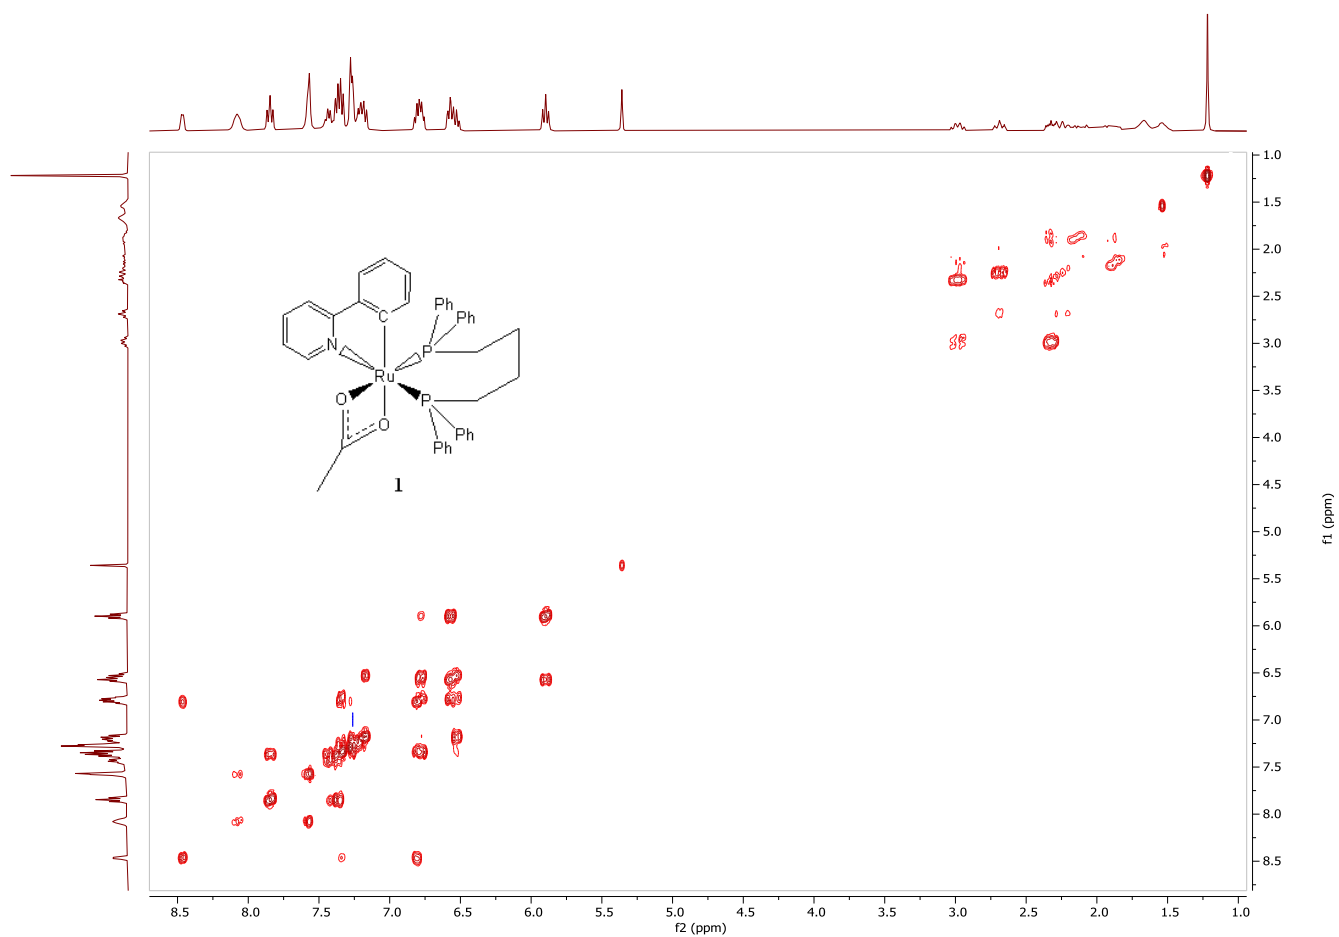

**Figure S4.**  $^1\text{H}$ - $^1\text{H}$  COSY 2D NMR spectrum of  $[\text{Ru}(\mathbf{a})(\eta^2\text{-OAc})(\text{dppb})]$  (**1**) in  $\text{CD}_2\text{Cl}_2$  at 25 °C.

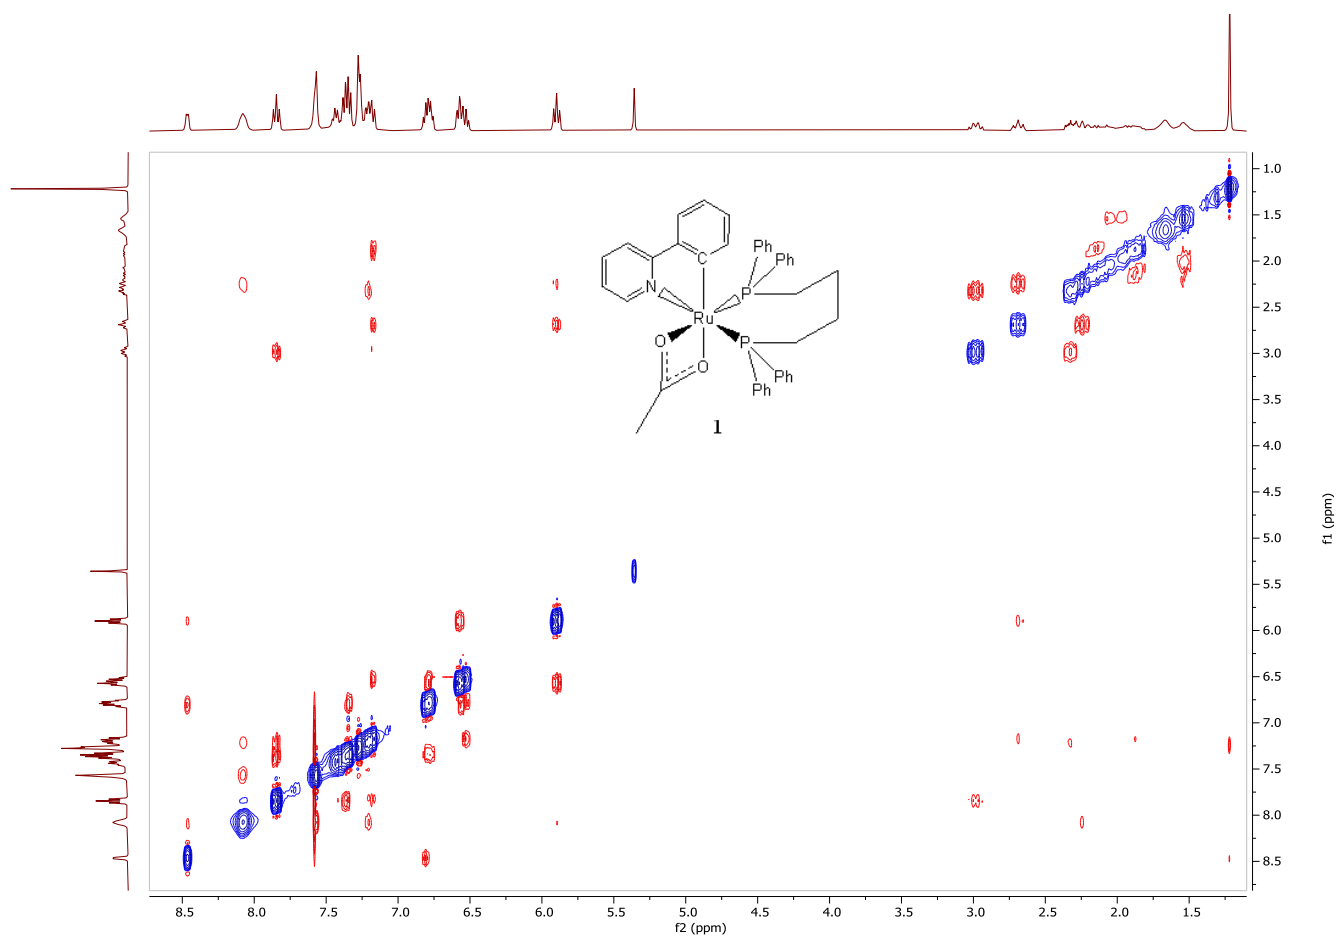

**Figure S5.** <sup>1</sup>H-<sup>1</sup>H NOESY 2D NMR spectrum of [Ru(**a**)(η<sup>2</sup>-OAc)(dppb)] (**1**) in CD<sub>2</sub>Cl<sub>2</sub> at 25 °C.

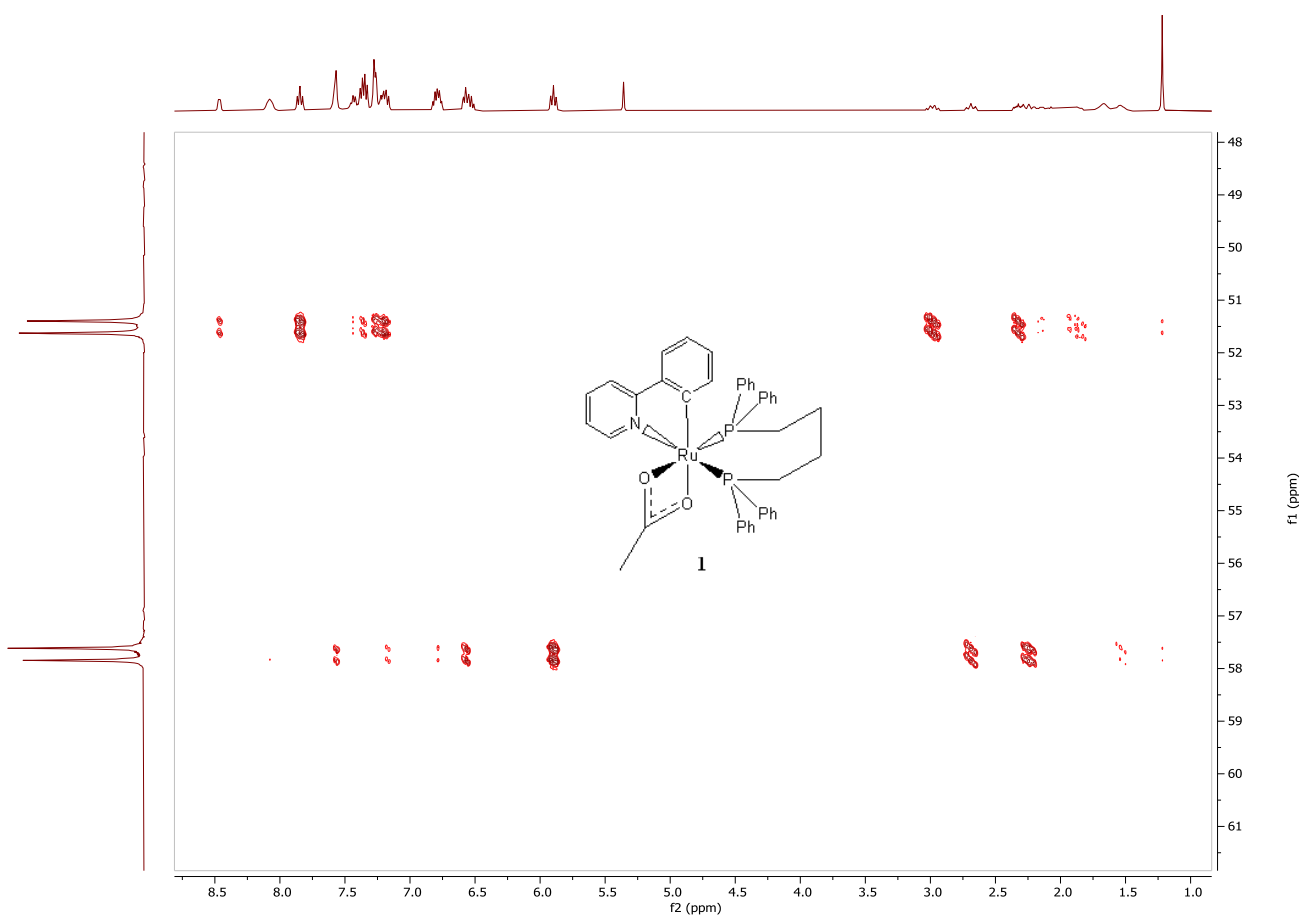

**Figure S6.**  $^1\text{H}$ - $^{31}\text{P}$  HMBC 2D NMR spectrum of  $[\text{Ru}(\mathbf{a})(\eta^2\text{-OAc})(\text{dppb})]$  (**1**) in  $\text{CD}_2\text{Cl}_2$  at 25 °C.

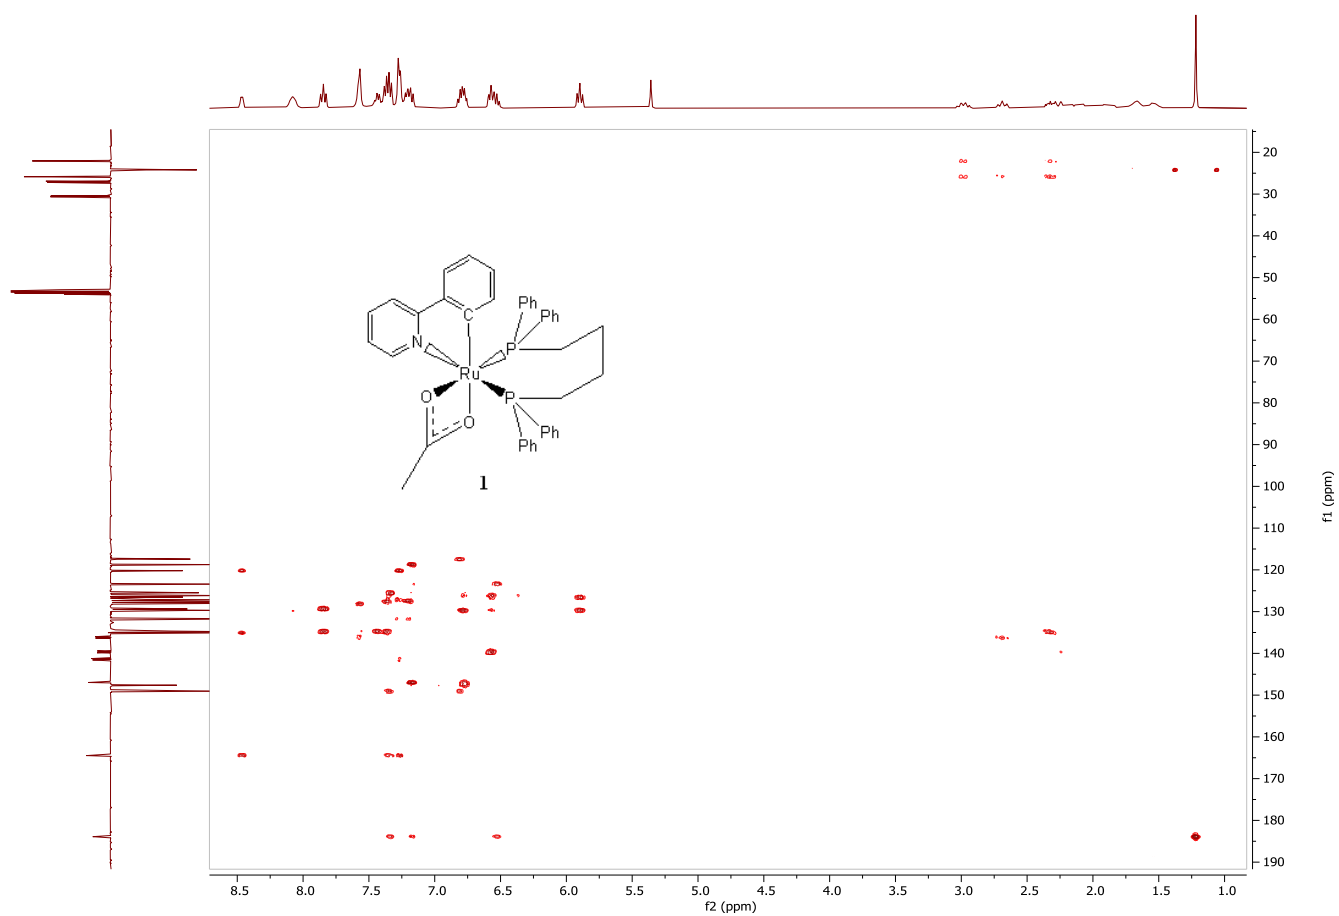

**Figure S7.**  $^1\text{H}$ - $^{13}\text{C}$  HMBC 2D NMR spectrum of  $[\text{Ru}(\mathbf{a})(\eta^2\text{-OAc})(\text{dppb})]$  (**1**) in  $\text{CD}_2\text{Cl}_2$  at 25 °C.

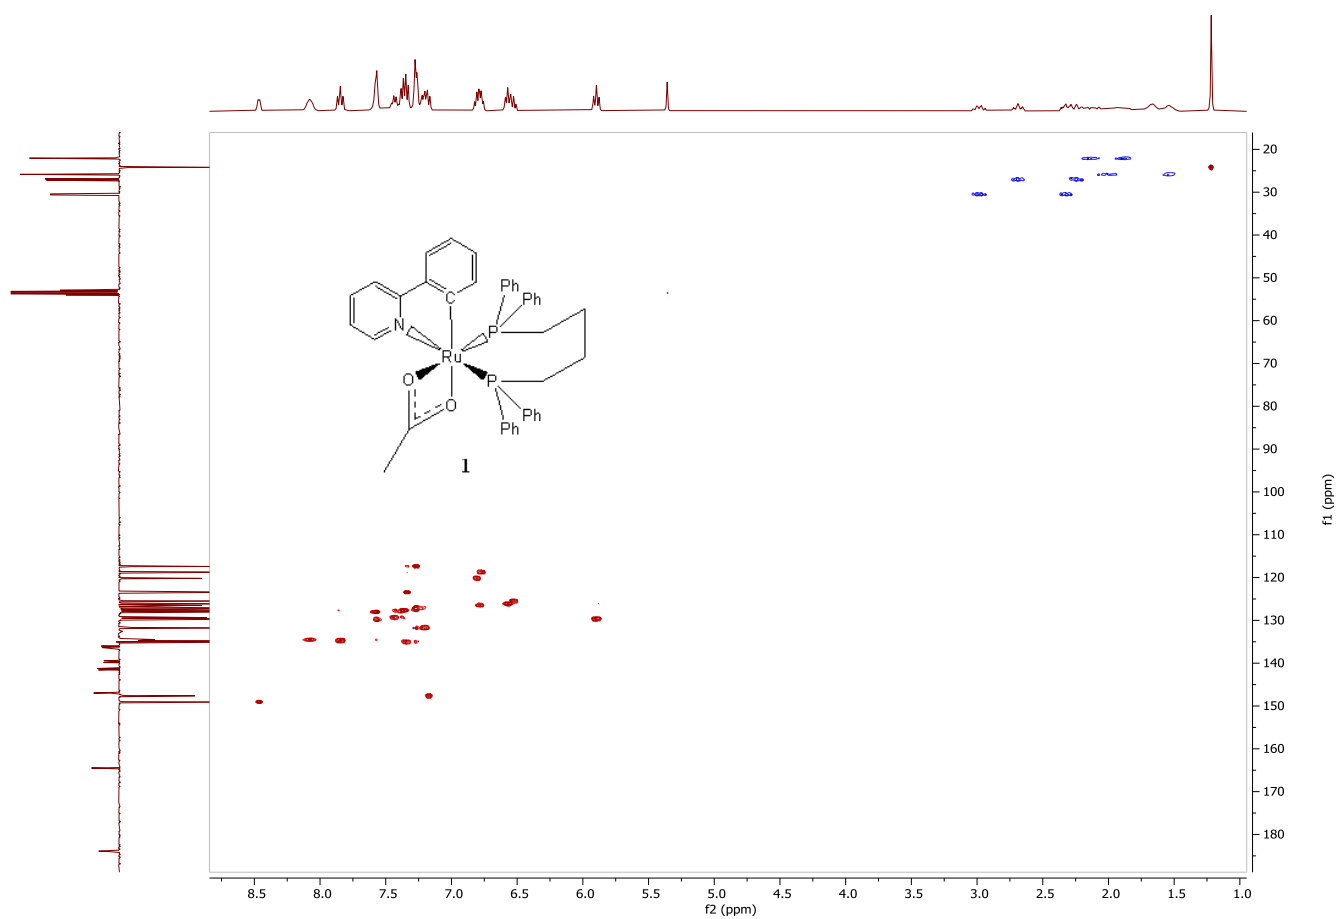

**Figure S8.** <sup>1</sup>H-<sup>13</sup>C HSQC 2D NMR spectrum of [Ru(a)(η<sup>2</sup>-OAc)(dppb)] (1) in CD<sub>2</sub>Cl<sub>2</sub> at 25 °C.

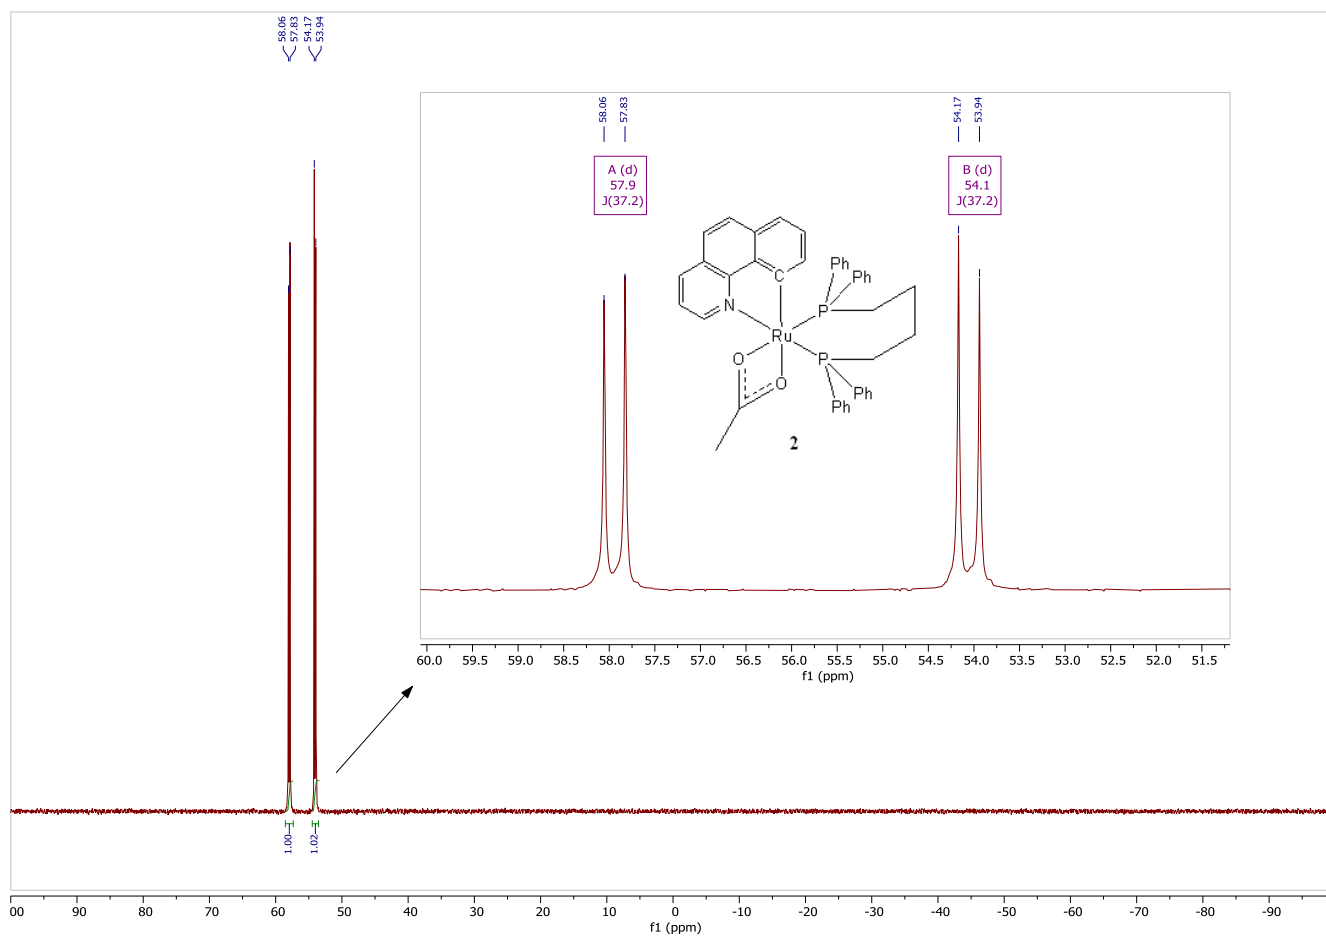

**Figure S9.**  $^{31}\text{P}\{^1\text{H}\}$  NMR spectrum (162.0 MHz) of  $[\text{Ru}(\mathbf{b})(\eta^2\text{-OAc})(\text{dppb})]$  (**2**) in  $\text{toluene-}d^8$  at  $25\text{ }^\circ\text{C}$ .

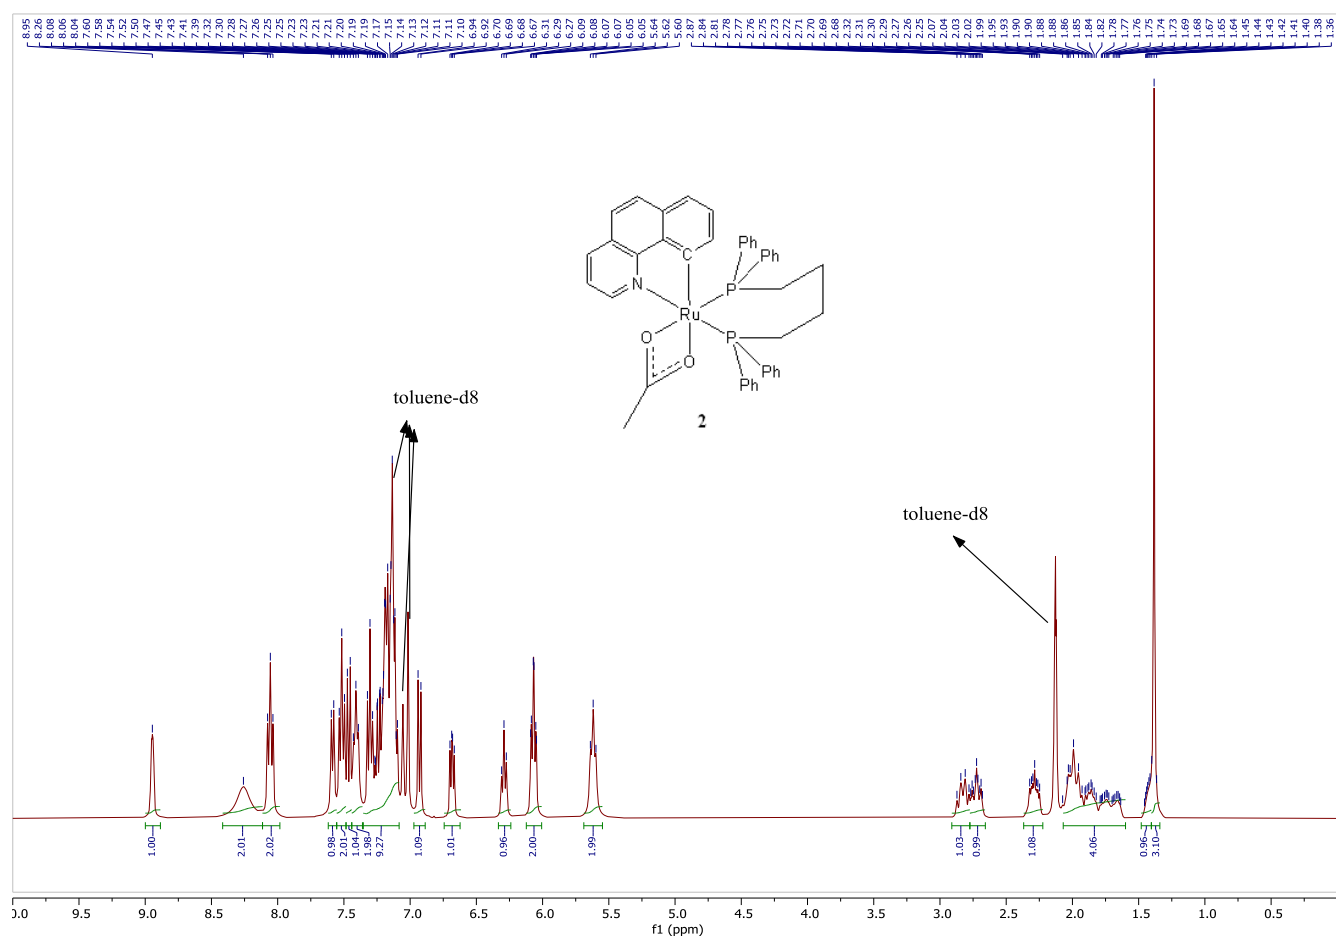

**Figure S10.**  $^1\text{H}$  NMR spectrum (400.1 MHz) of  $[\text{Ru}(\mathbf{b})(\eta^2\text{-OAc})(\text{dppb})]$  (**2**) in  $\text{toluene-}d_8$  at  $25\text{ }^\circ\text{C}$ .



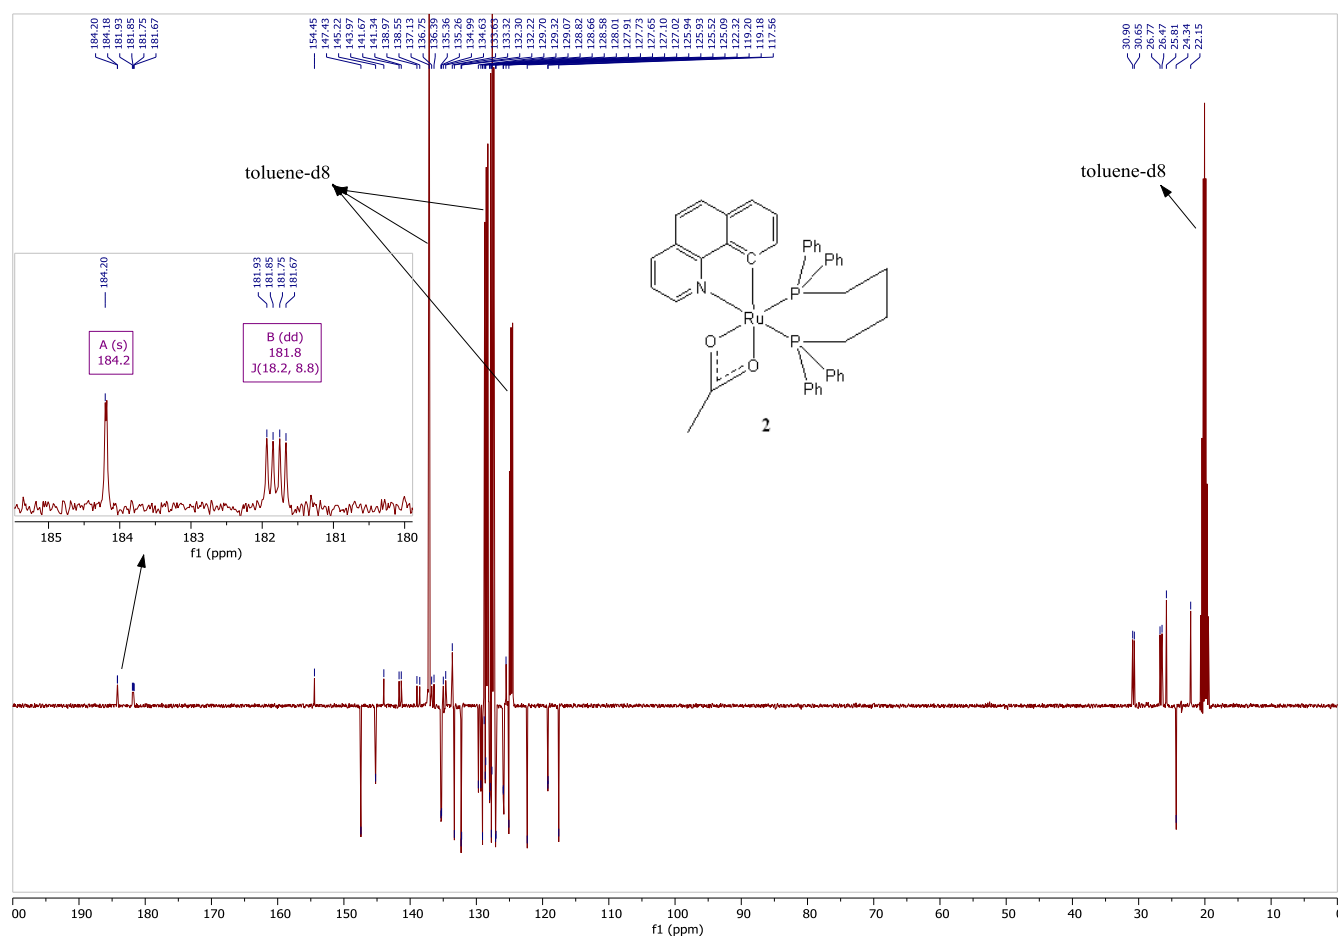

**Figure S11.**  $^{13}\text{C}\{^1\text{H}\}$  DEPTQ NMR spectrum (100.6 MHz) of  $[\text{Ru}(\mathbf{b})(\eta^2\text{-OAc})(\text{dppb})]$  (**2**) in toluene- $d^8$  at 25 °C.

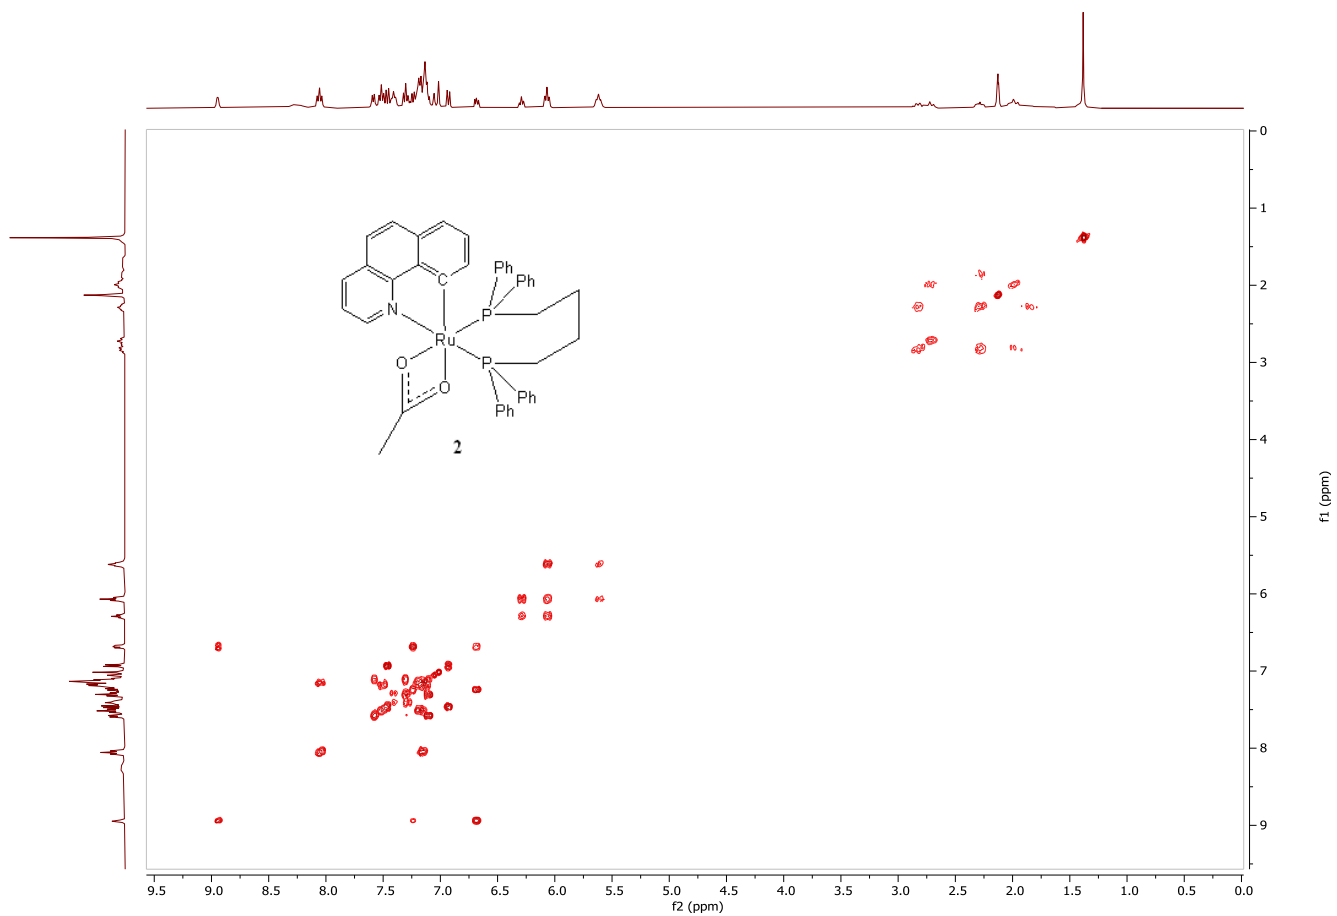

**Figure S12.** <sup>1</sup>H-<sup>1</sup>H COSY 2D NMR spectrum of [Ru(**b**)(η<sup>2</sup>-OAc)(dppb)] (**2**) in toluene-*d*<sup>8</sup> at 25 °C.

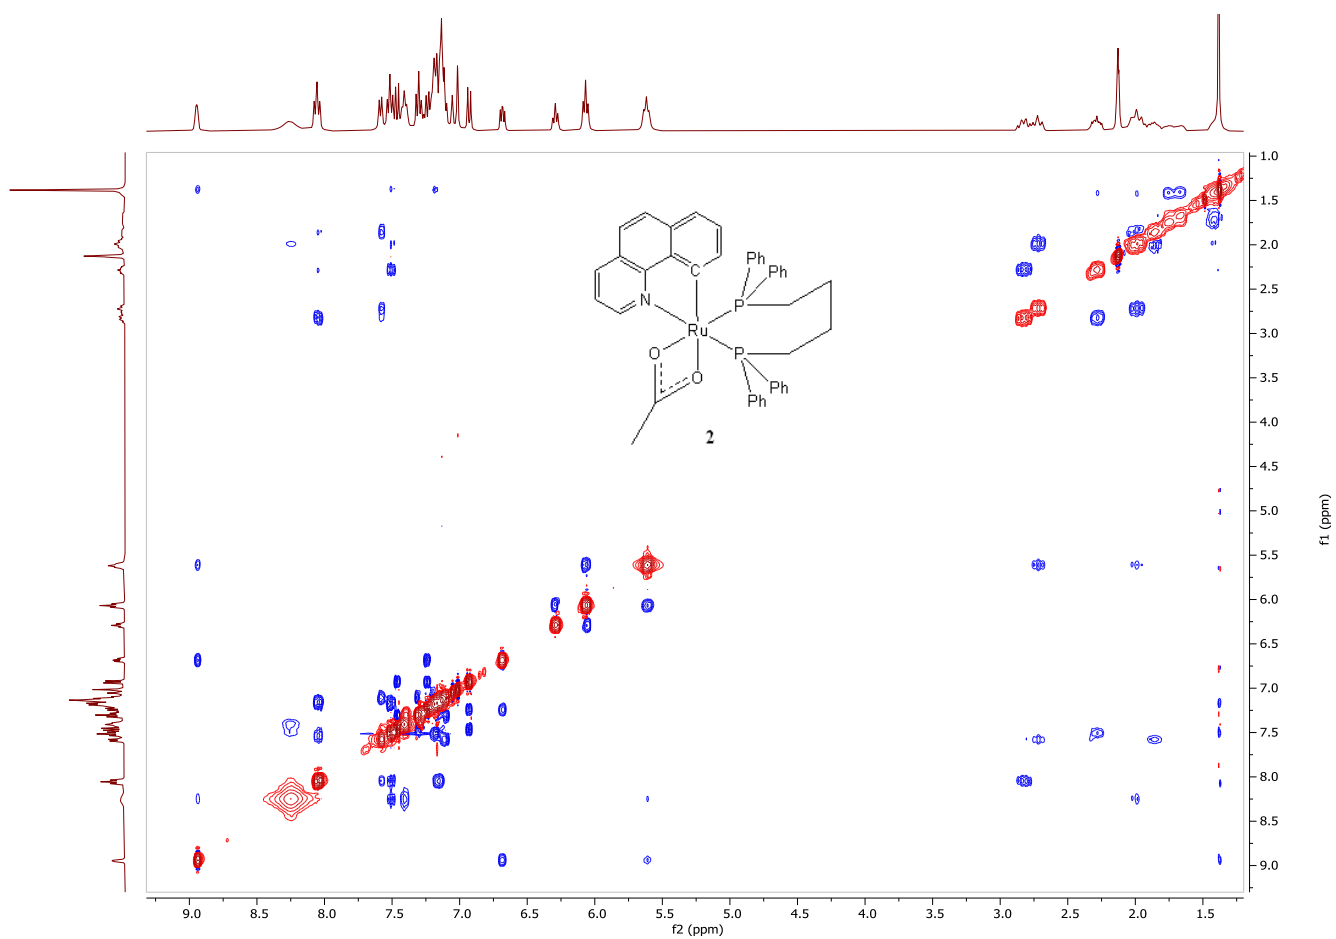

**Figure S13.** <sup>1</sup>H-<sup>1</sup>H NOESY 2D NMR spectrum of [Ru(**b**)(η<sup>2</sup>-OAc)(dppb)] (**2**) in toluene-*d*<sup>8</sup> at 25 °C.

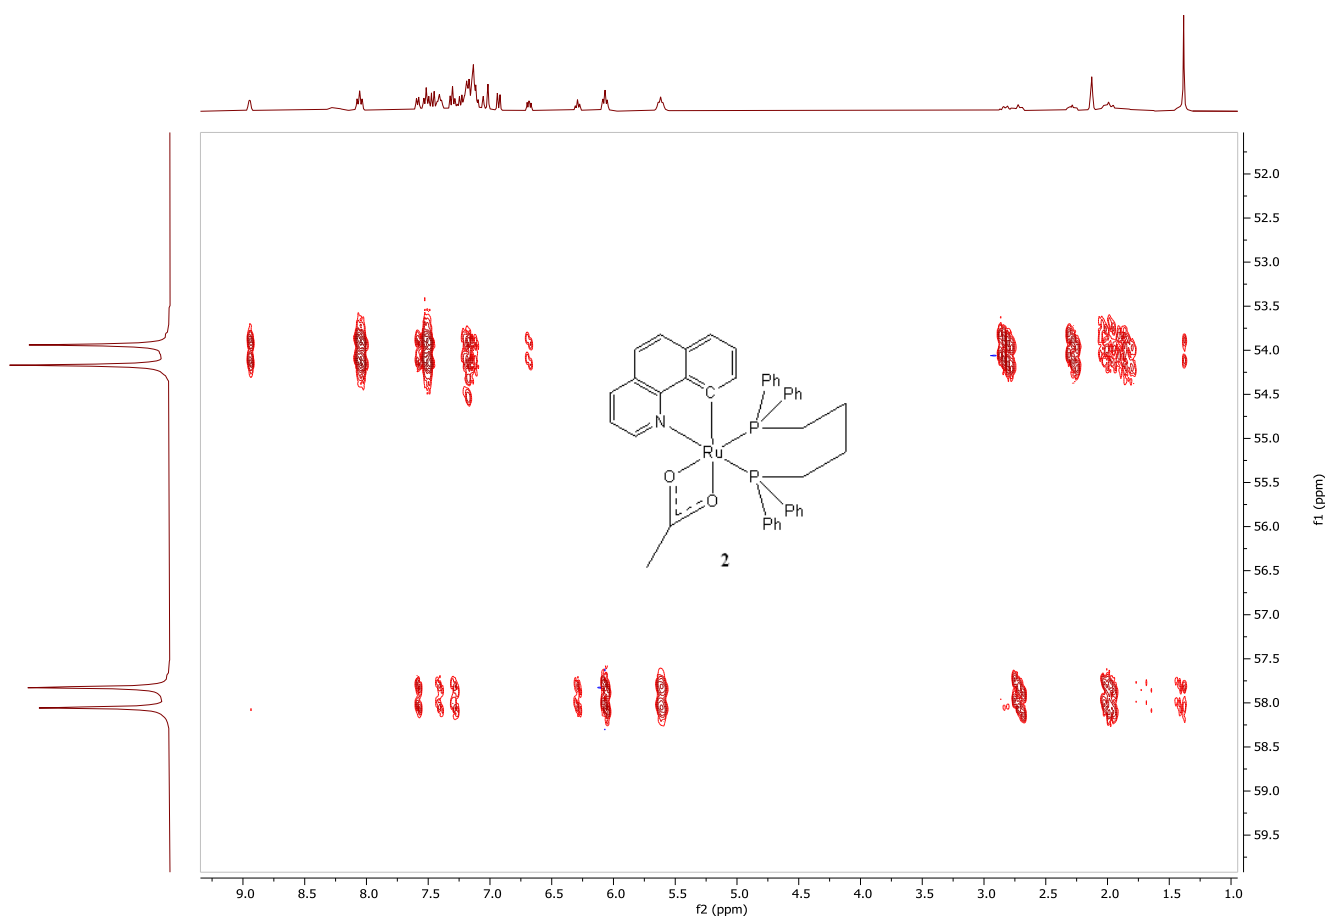

**Figure S14.**  $^1\text{H}$ - $^{31}\text{P}$  HMBC 2D NMR spectrum of  $[\text{Ru}(\mathbf{b})(\eta^2\text{-OAc})(\text{dppb})]$  (**2**) in  $\text{CD}_2\text{Cl}_2$  at 25 °C.

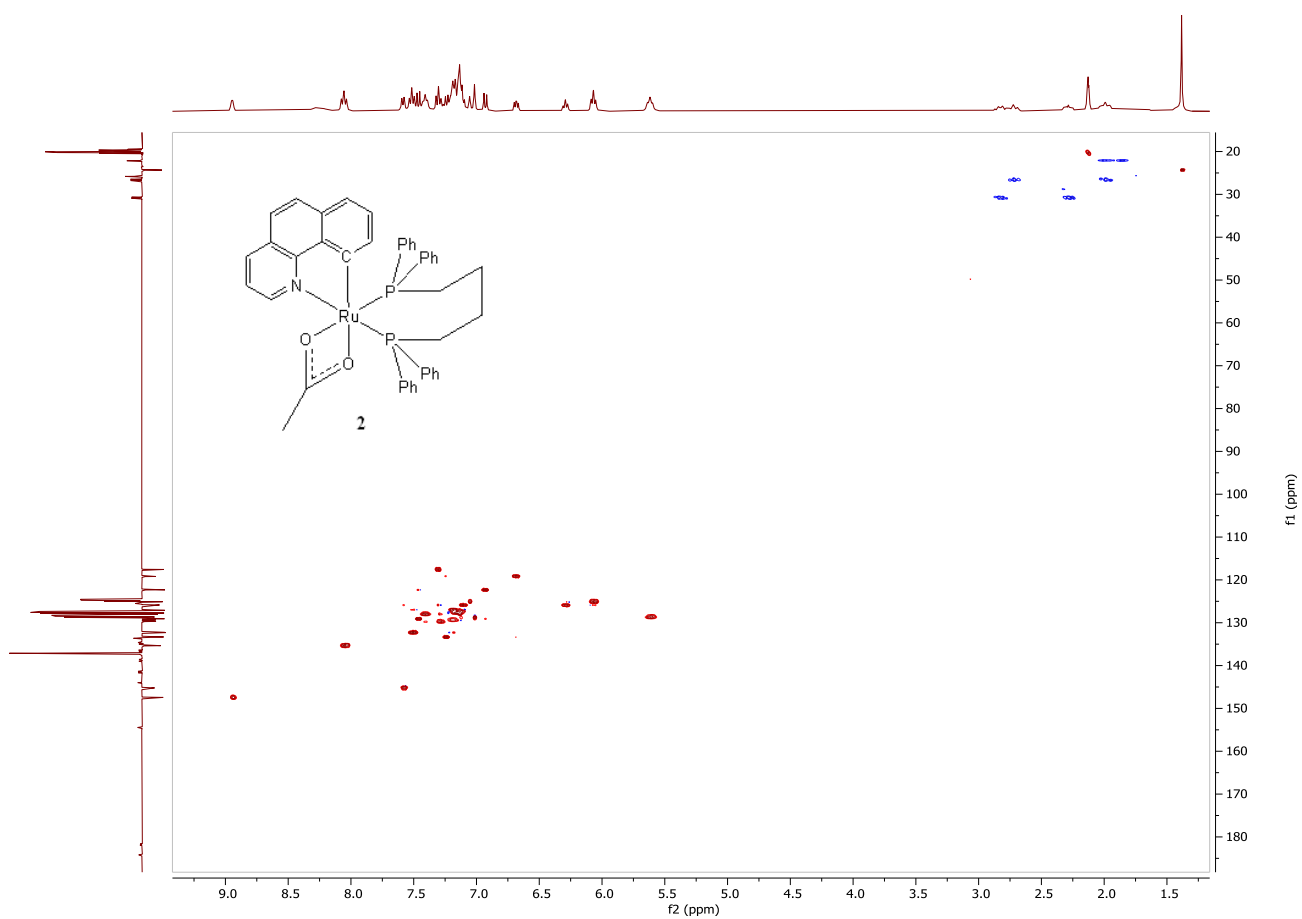

**Figure S15.**  $^1\text{H}$ - $^{13}\text{C}$  HSQC 2D NMR spectrum of  $[\text{Ru}(\mathbf{b})(\eta^2\text{-OAc})(\text{dppb})]$  (**2**) in  $\text{CD}_2\text{Cl}_2$  at 25 °C.

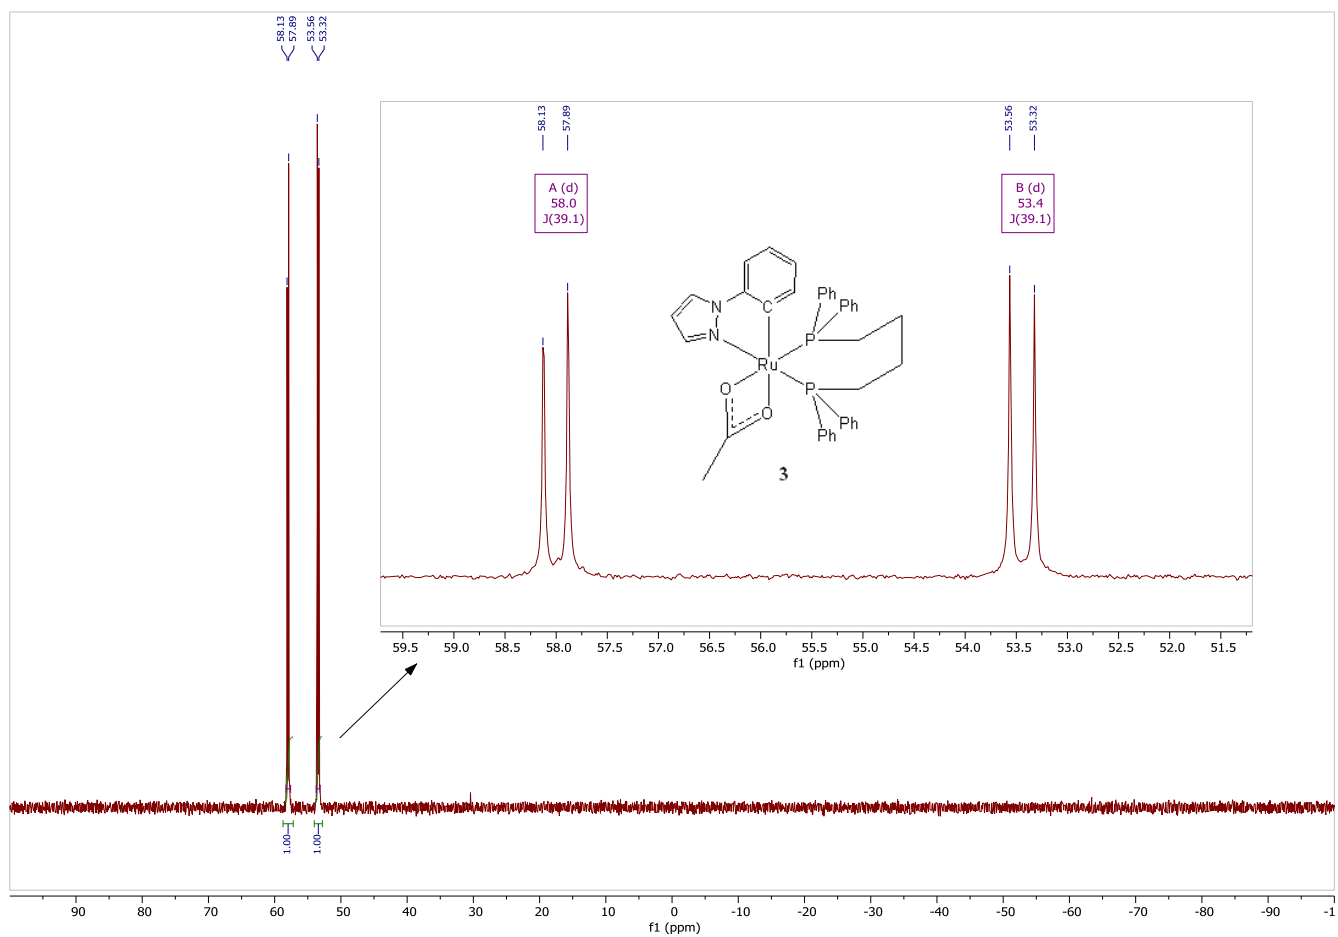

**Figure S16.**  $^{31}\text{P}\{^1\text{H}\}$  NMR spectrum (162.0 MHz) of  $[\text{Ru}(\mathbf{c})(\eta^2\text{-OAc})(\text{dppb})]$  (**3**) in  $\text{CD}_2\text{Cl}_2$  at  $25\text{ }^\circ\text{C}$ .

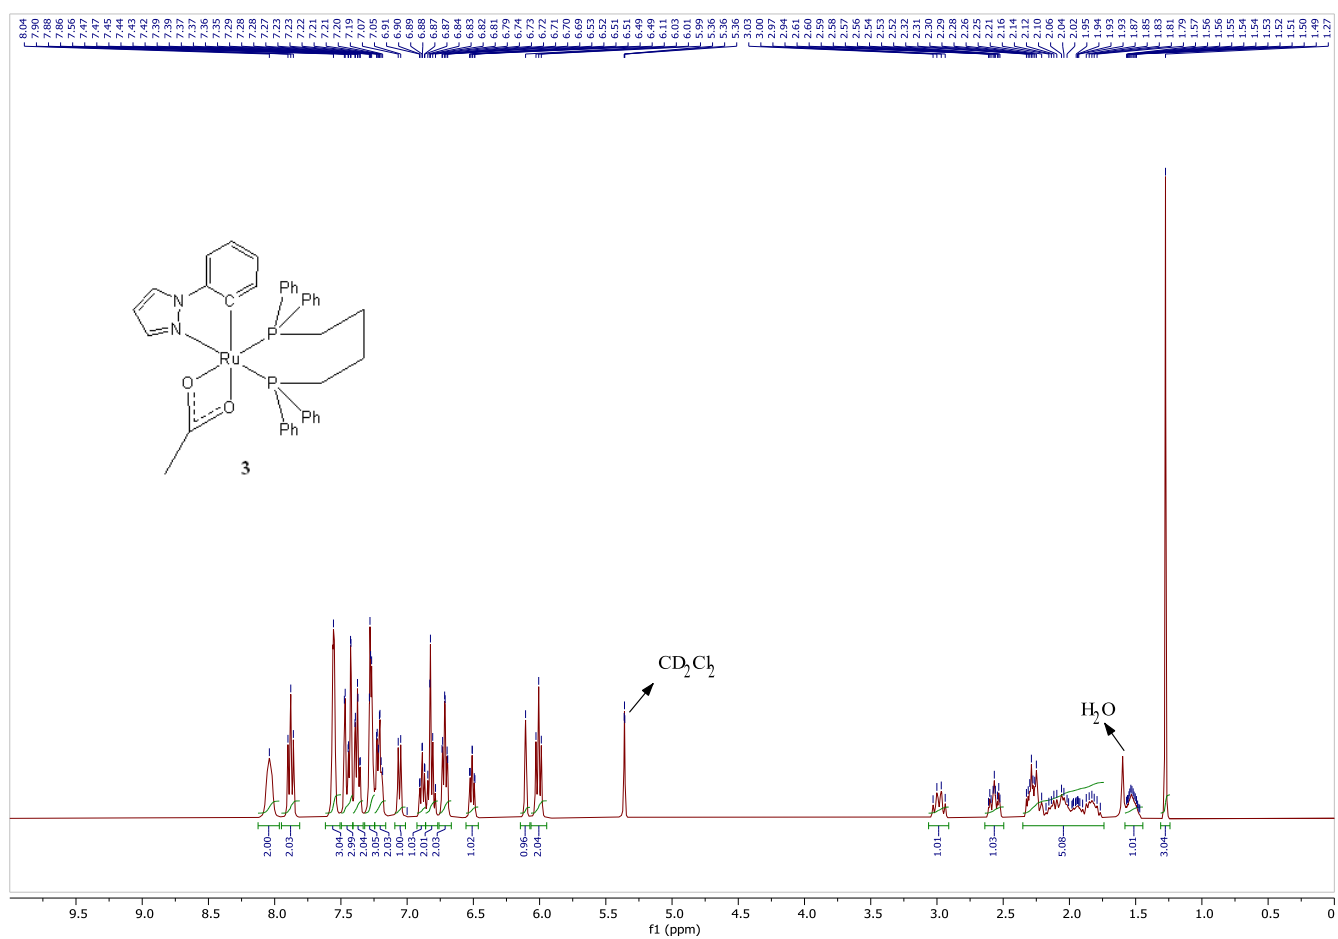

**Figure S17.**  $^1\text{H}$  NMR spectrum (400.1 MHz) of  $[\text{Ru}(\text{c})(\eta^2\text{-OAc})(\text{dppb})]$  (**3**) in  $\text{CD}_2\text{Cl}_2$  at  $25^\circ\text{C}$ .





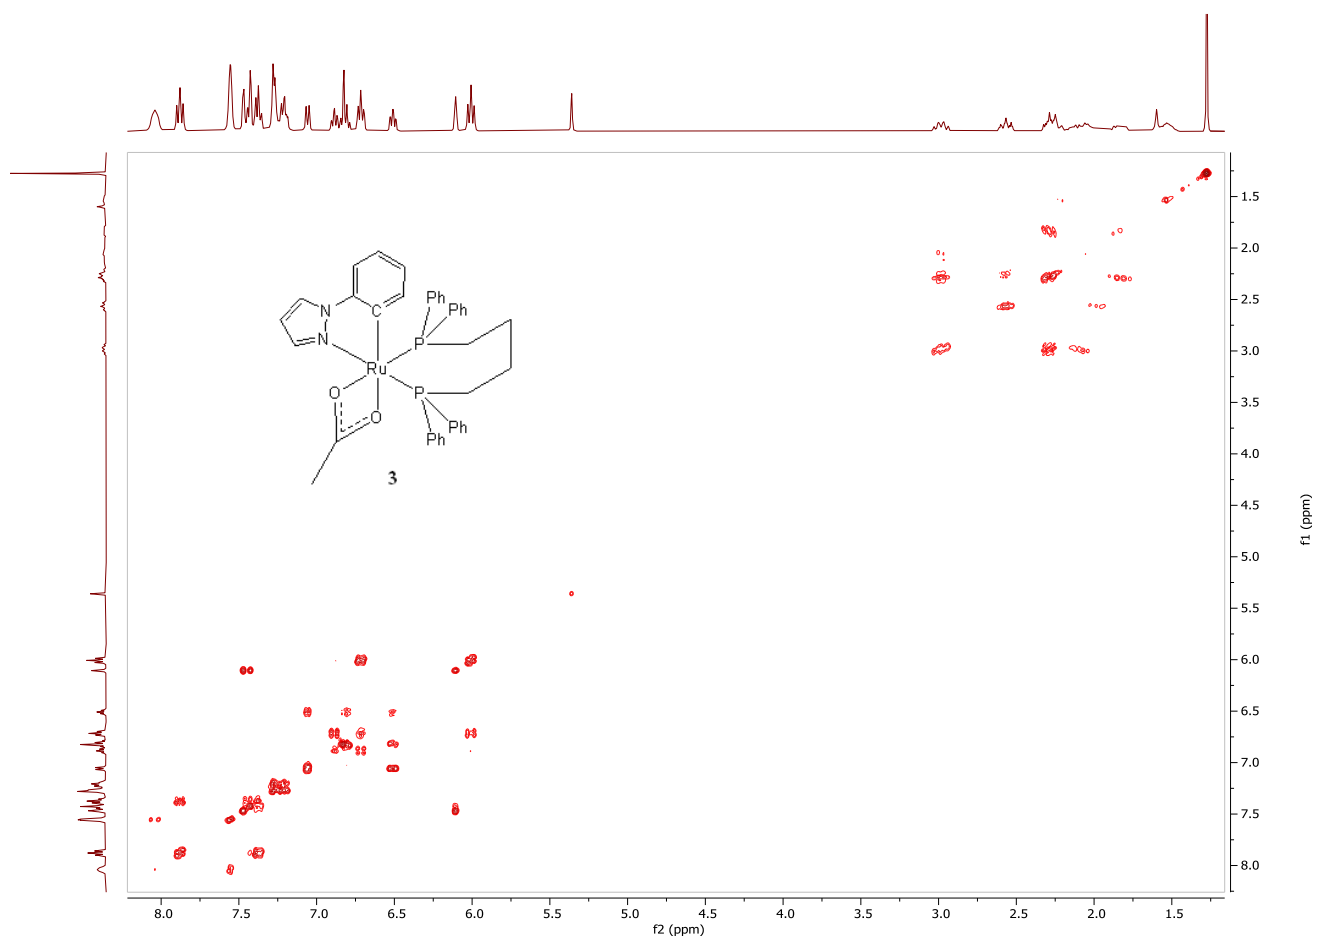

**Figure S19.**  $^1\text{H}$ - $^1\text{H}$  COSY 2D NMR spectrum of  $[\text{Ru}(\text{c})(\eta^2\text{-OAc})(\text{dppb})]$  (**3**) in  $\text{CD}_2\text{Cl}_2$  at 25 °C.

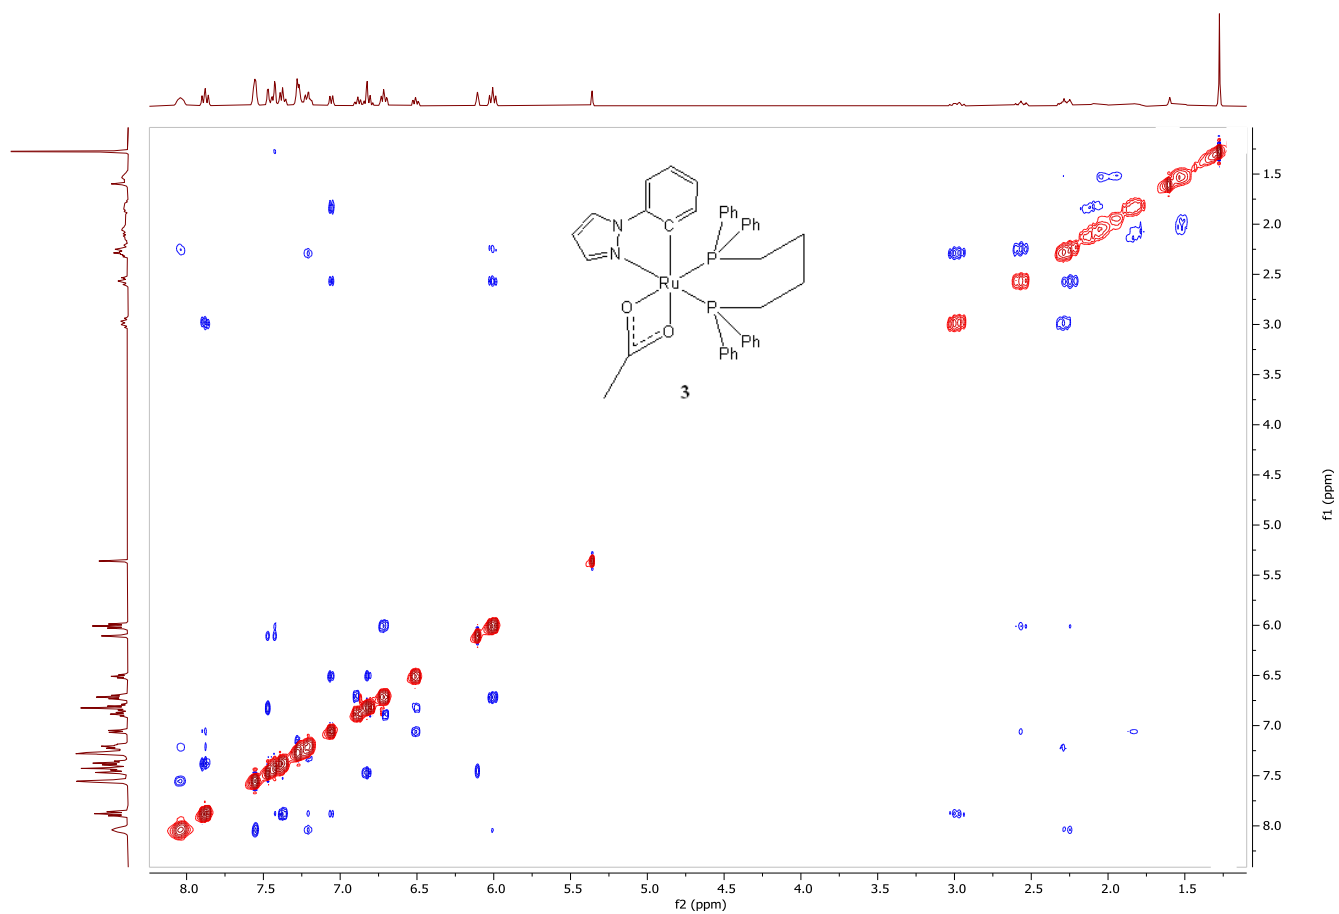

**Figure S20.** <sup>1</sup>H-<sup>1</sup>H NOESY 2D NMR spectrum of [Ru(c)(η<sup>2</sup>-OAc)(dppb)] (**3**) in CD<sub>2</sub>Cl<sub>2</sub> at 25 °C.

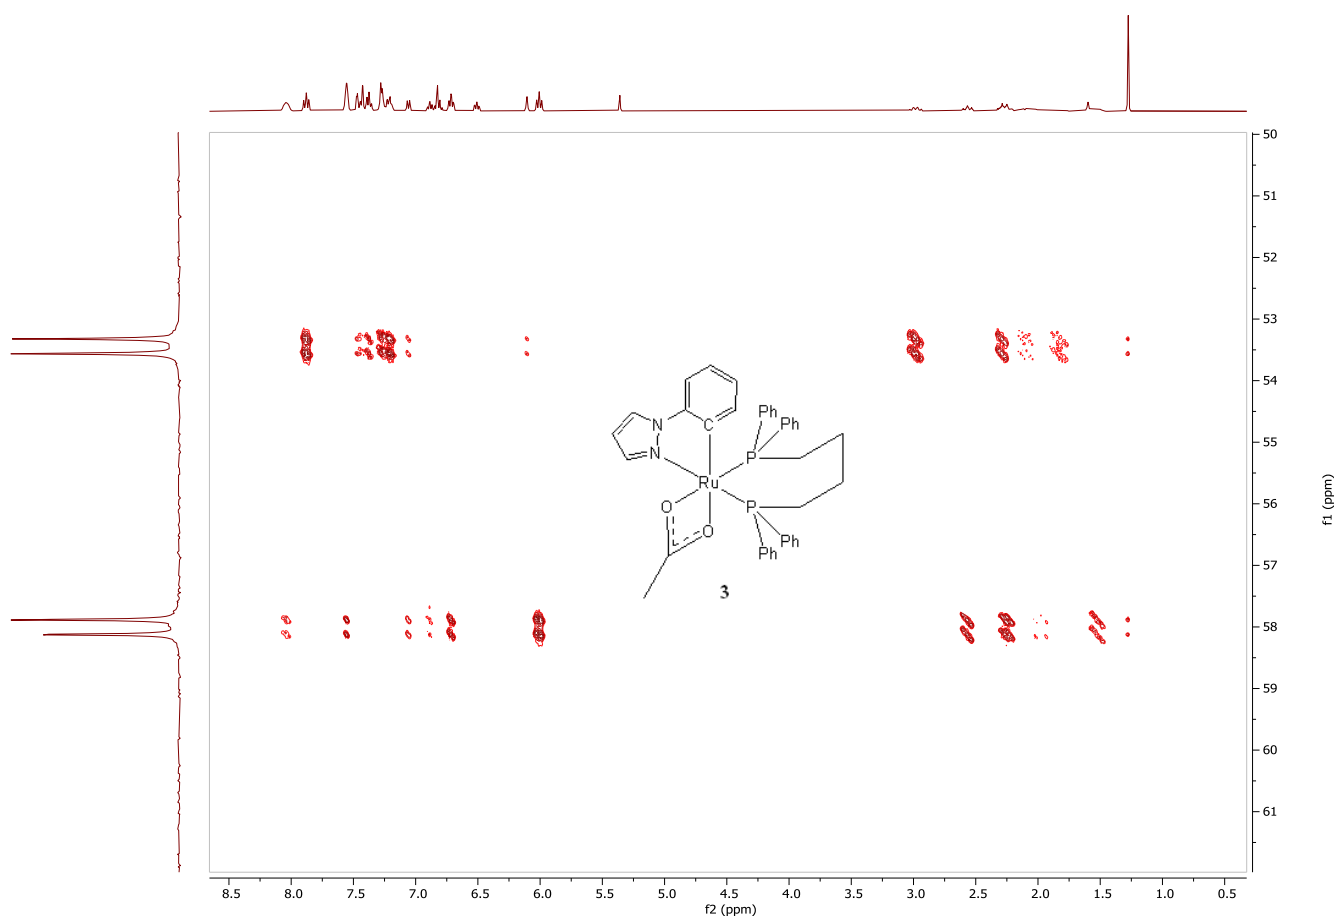

**Figure S21.**  $^1\text{H}$ - $^{31}\text{P}$  HMBC 2D NMR spectrum of  $[\text{Ru}(\text{c})(\eta^2\text{-OAc})(\text{dppb})]$  (**3**) in  $\text{CD}_2\text{Cl}_2$  at  $25\text{ }^\circ\text{C}$ .

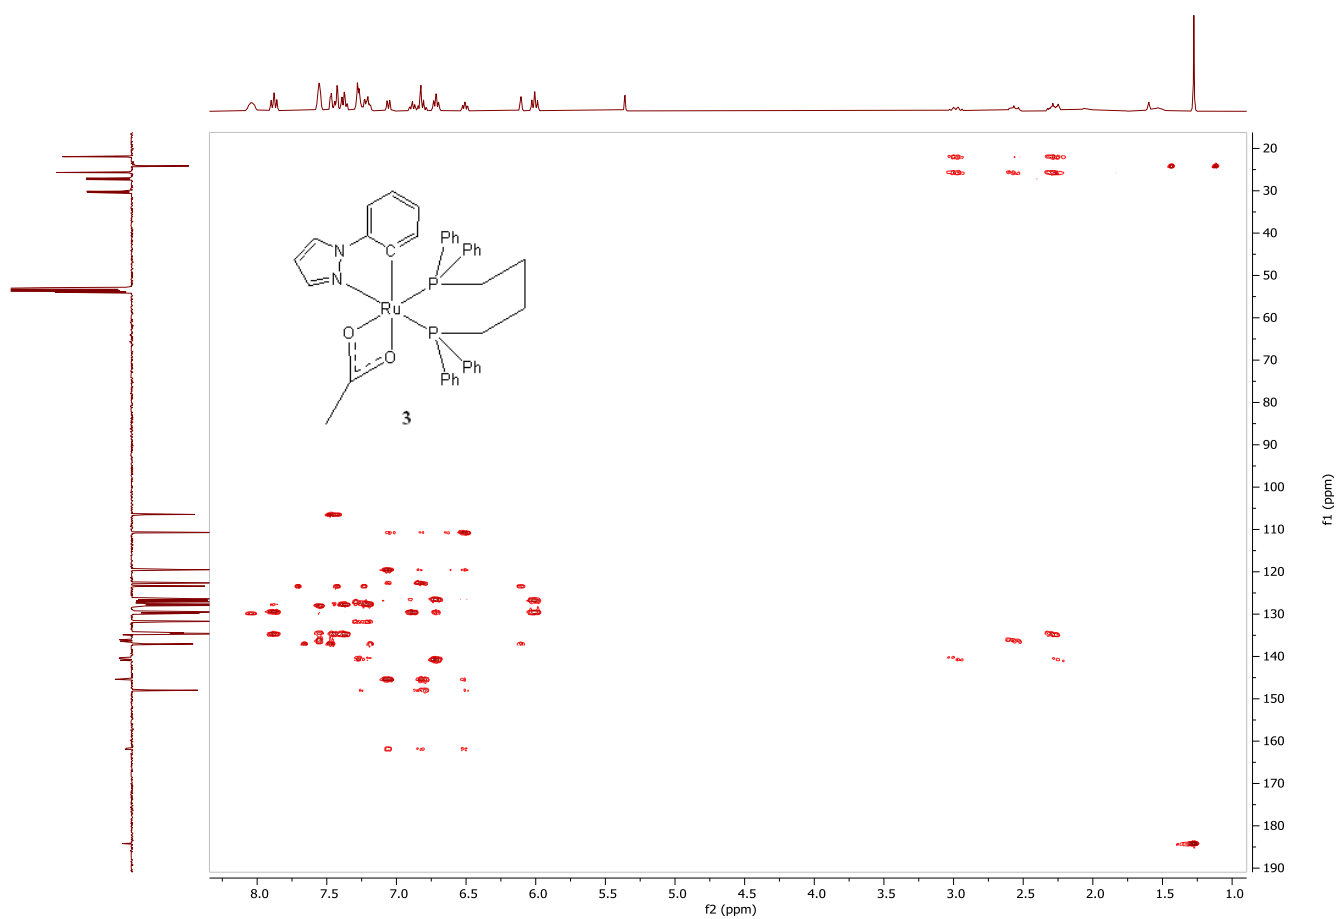

**Figure S22.**  $^1\text{H}$ - $^{13}\text{C}$  HMBC 2D NMR spectrum of  $[\text{Ru}(\text{c})(\eta^2\text{-OAc})(\text{dppb})]$  (3) in  $\text{CD}_2\text{Cl}_2$  at  $25\text{ }^\circ\text{C}$ .

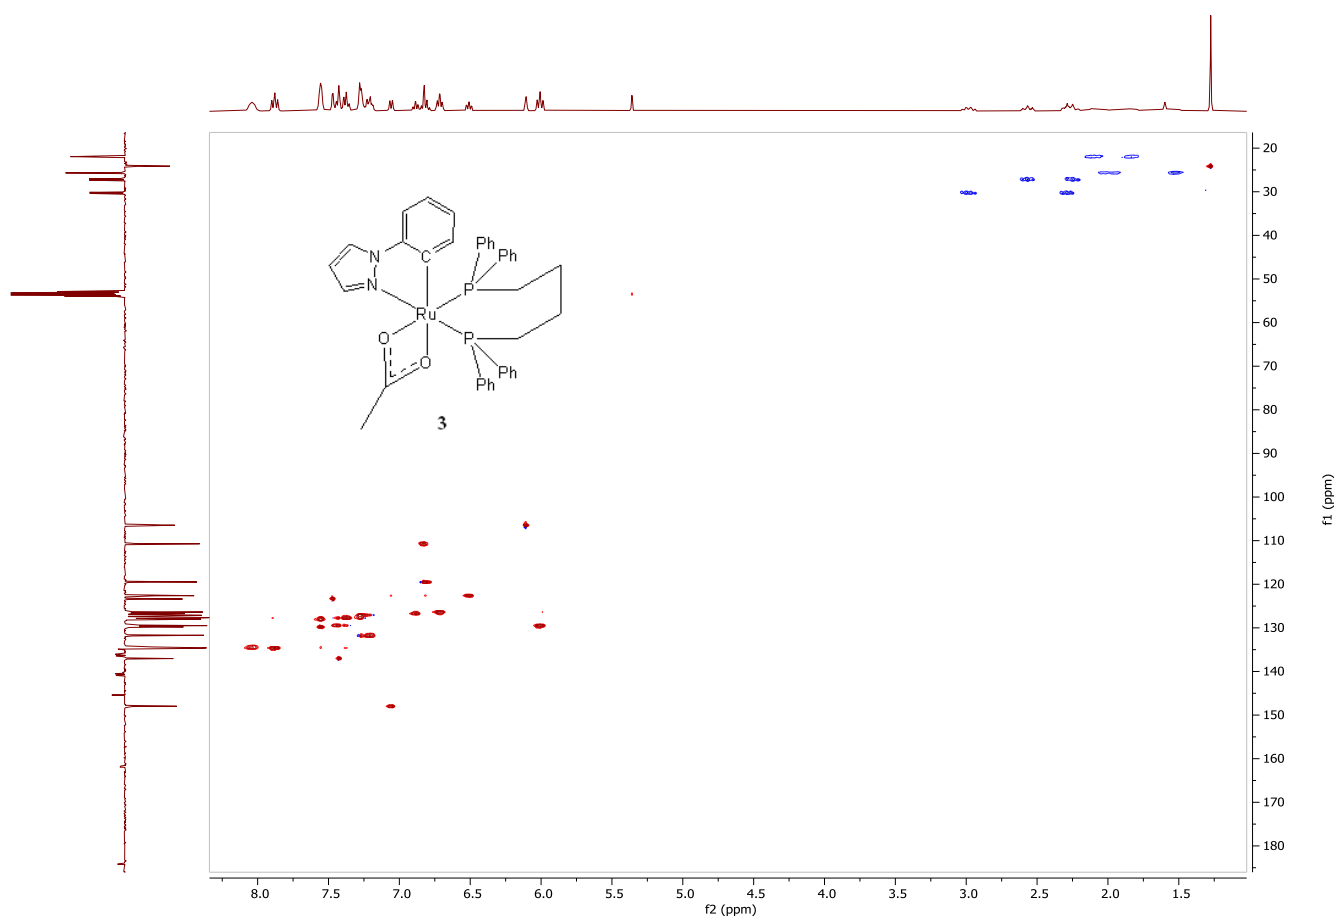

**Figure S23.**  $^1\text{H}$ - $^{13}\text{C}$  HSQC 2D NMR spectrum of  $[\text{Ru}(\text{c})(\eta^2\text{-OAc})(\text{dppb})]$  (**3**) in  $\text{CD}_2\text{Cl}_2$  at 25 °C.

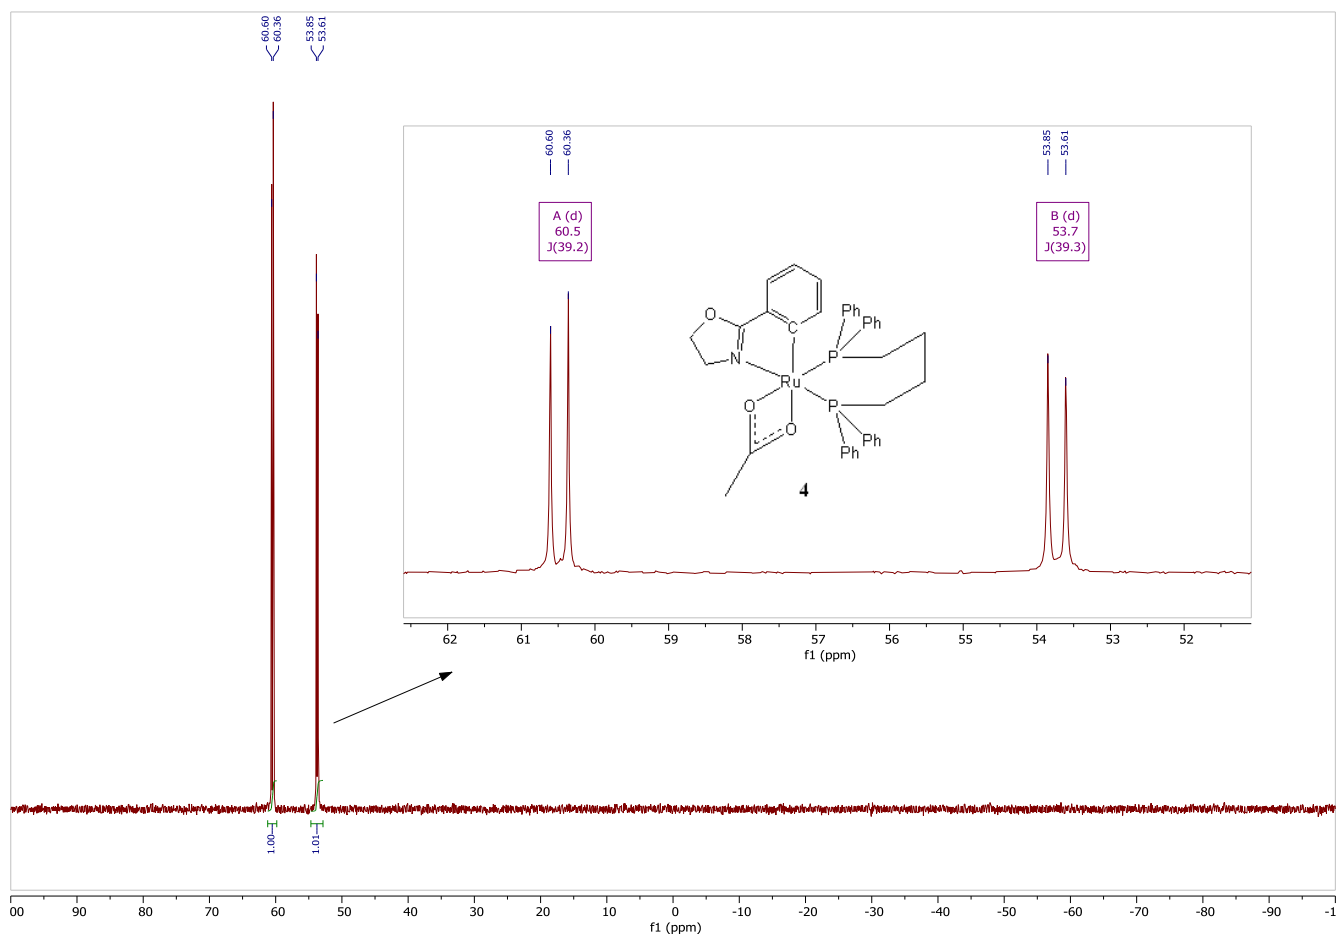

**Figure S24.**  $^{31}\text{P}\{^1\text{H}\}$  NMR spectrum (162.0 MHz) of  $[\text{Ru}(\mathbf{d})(\eta^2\text{-OAc})(\text{dppb})]$  (**4**) in  $\text{CD}_2\text{Cl}_2$  at  $25^\circ\text{C}$ .

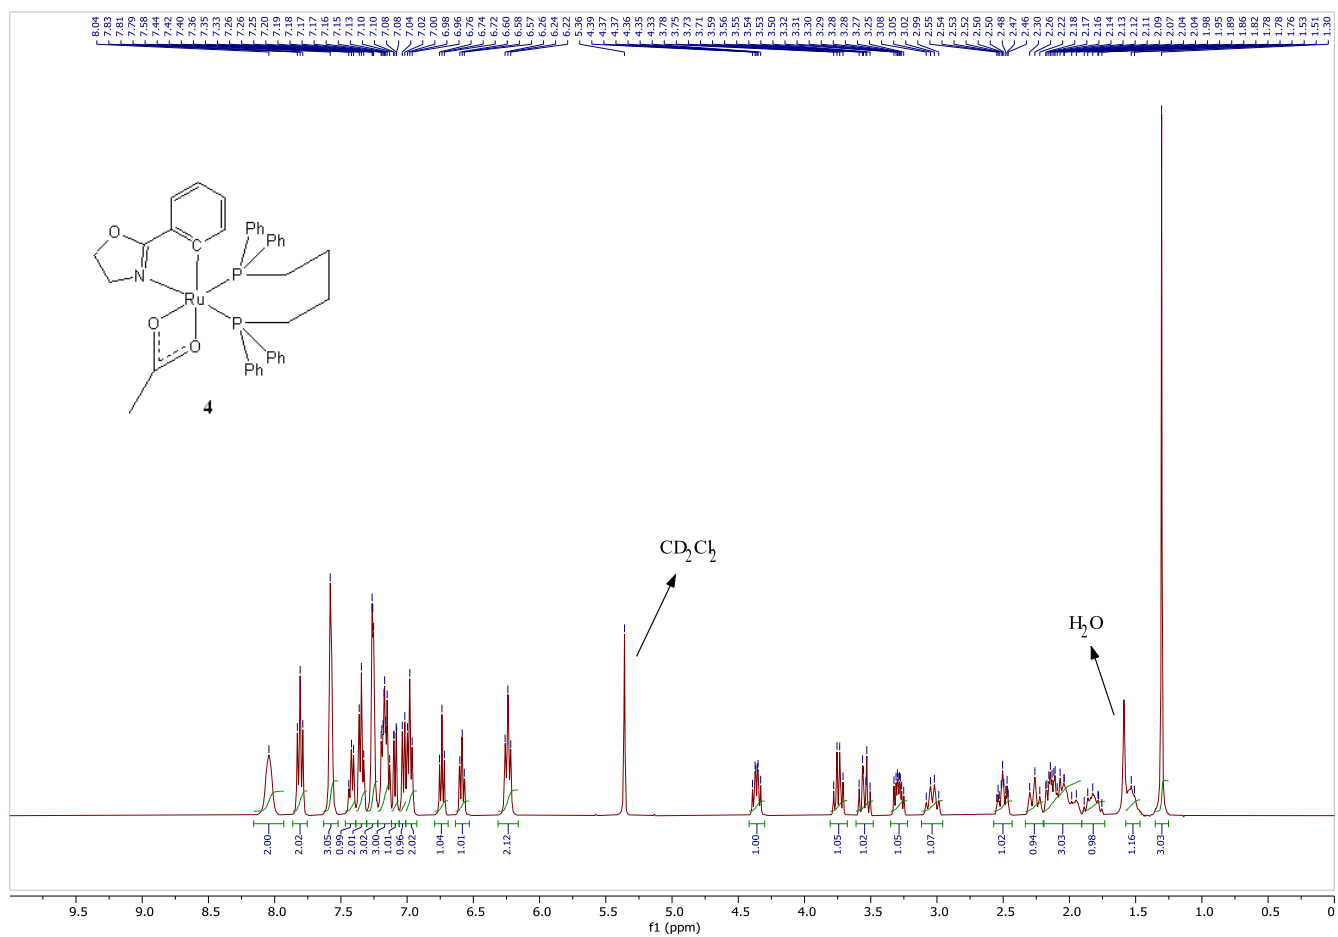

**Figure S25.**  $^1\text{H}$  NMR spectrum (400.1 MHz) of  $[\text{Ru}(\mathbf{d})(\eta^2\text{-OAc})(\text{dppb})]$  (**4**) in  $\text{CD}_2\text{Cl}_2$  at  $25^\circ\text{C}$ .

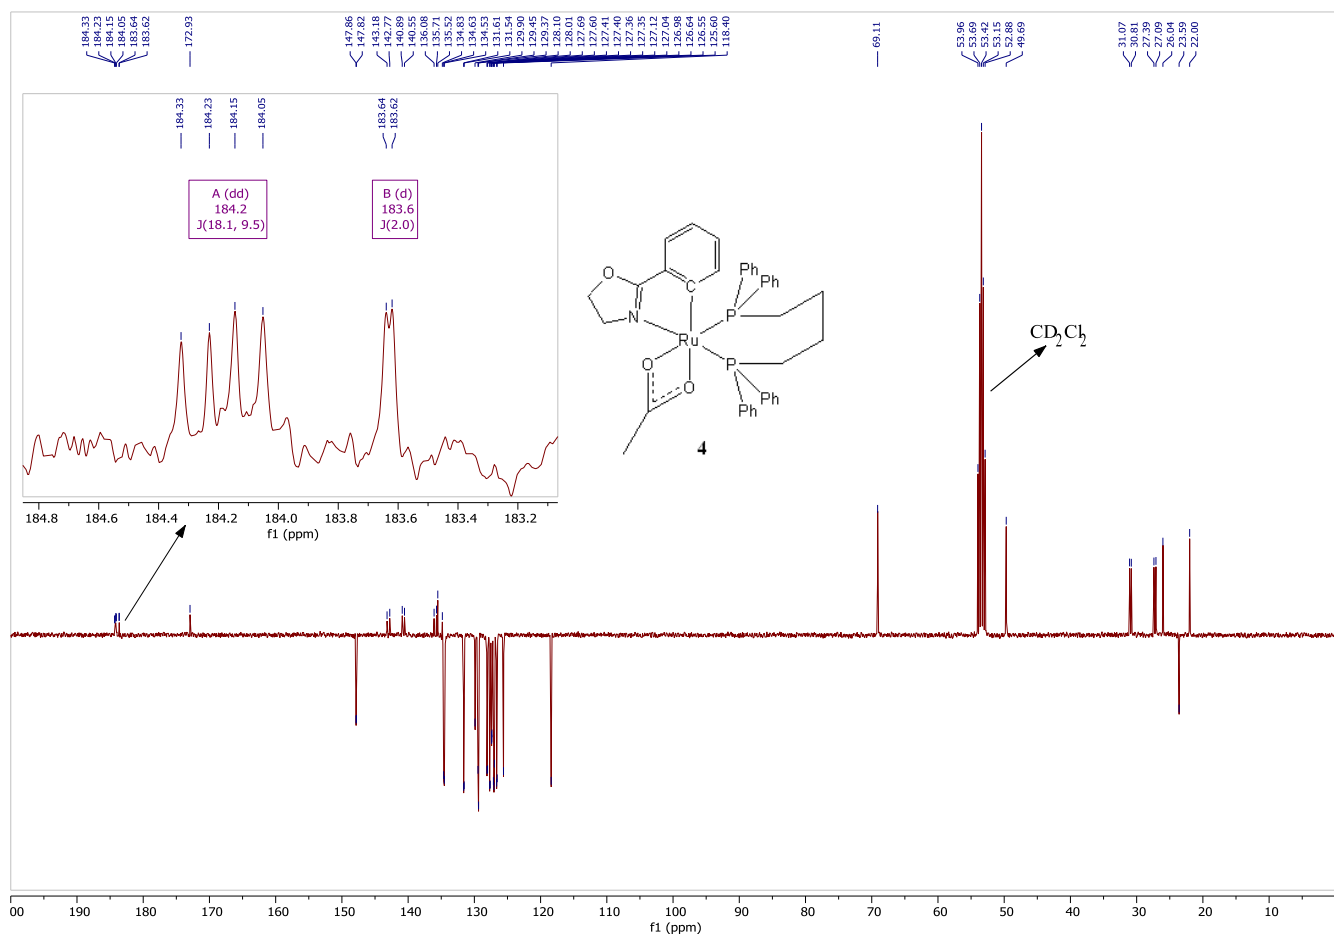

**Figure S26.**  $^{13}\text{C}\{^1\text{H}\}$  DEPTQ NMR spectrum (100.6 MHz) of  $[\text{Ru}(\mathbf{d})(\eta^2\text{-OAc})(\text{dppb})]$  (**4**) in  $\text{CD}_2\text{Cl}_2$  at 25 °C.



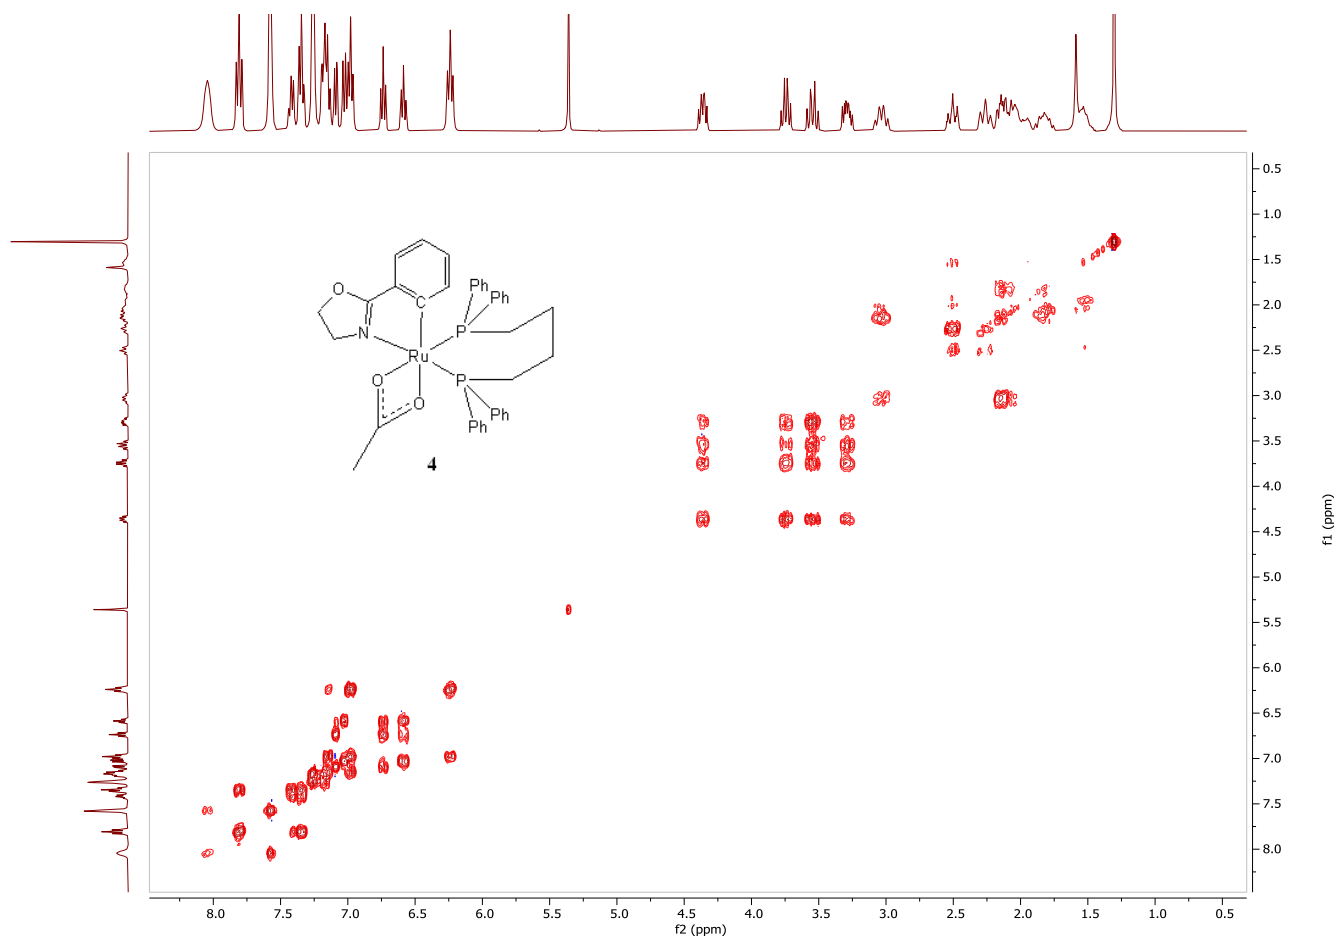

**Figure S27.**  $^1\text{H}$ - $^1\text{H}$  COSY 2D NMR spectrum of  $[\text{Ru}(\mathbf{d})(\eta^2\text{-OAc})(\text{dppb})]$  (**4**) in  $\text{CD}_2\text{Cl}_2$  at  $25\text{ }^\circ\text{C}$ .

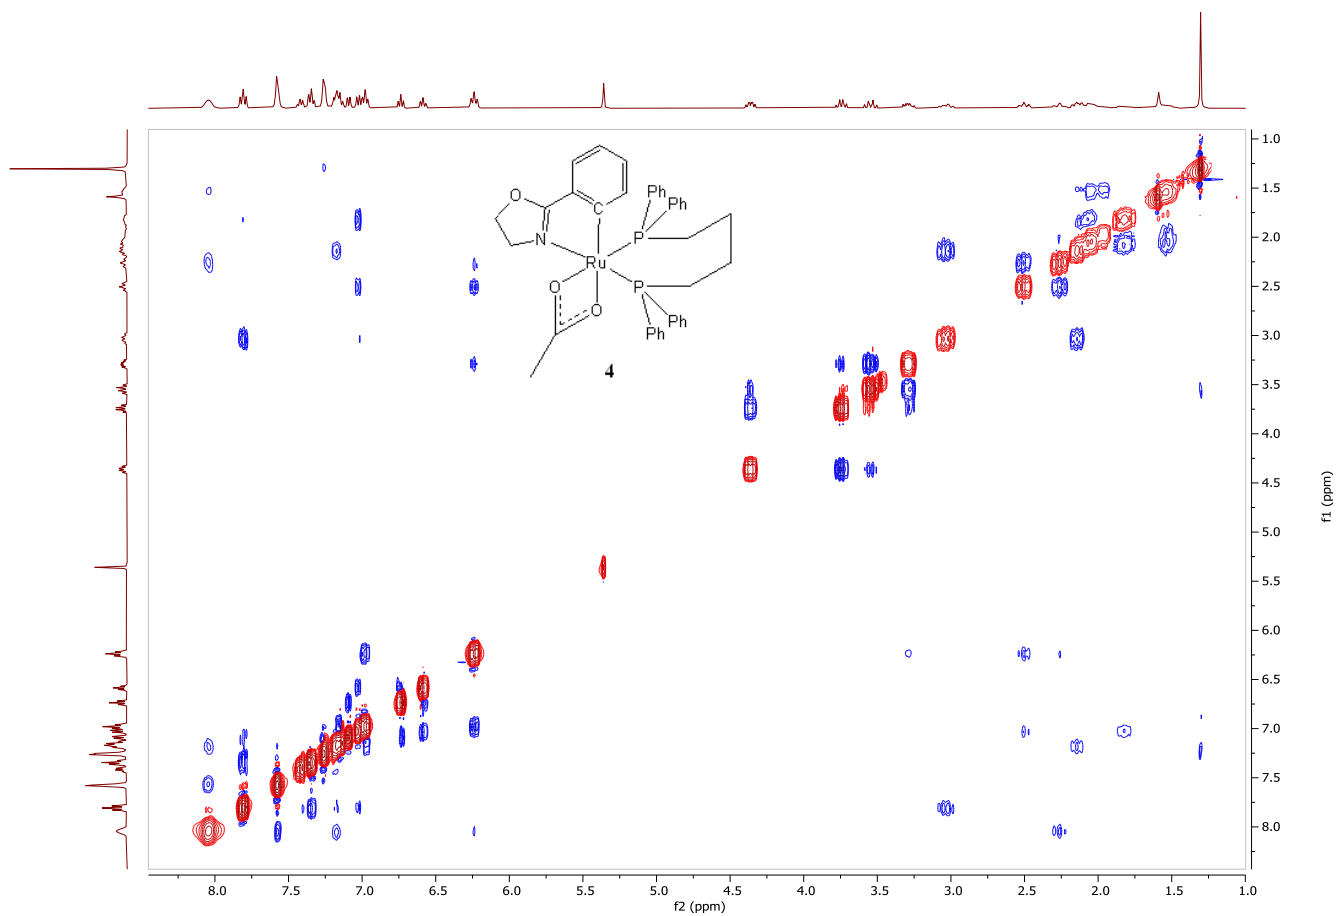

**Figure S28.**  $^1\text{H}$ - $^1\text{H}$  NOESY 2D NMR spectrum of  $[\text{Ru}(\mathbf{d})(\eta^2\text{-OAc})(\text{dppb})]$  (**4**) in  $\text{CD}_2\text{Cl}_2$  at  $25^\circ\text{C}$ .

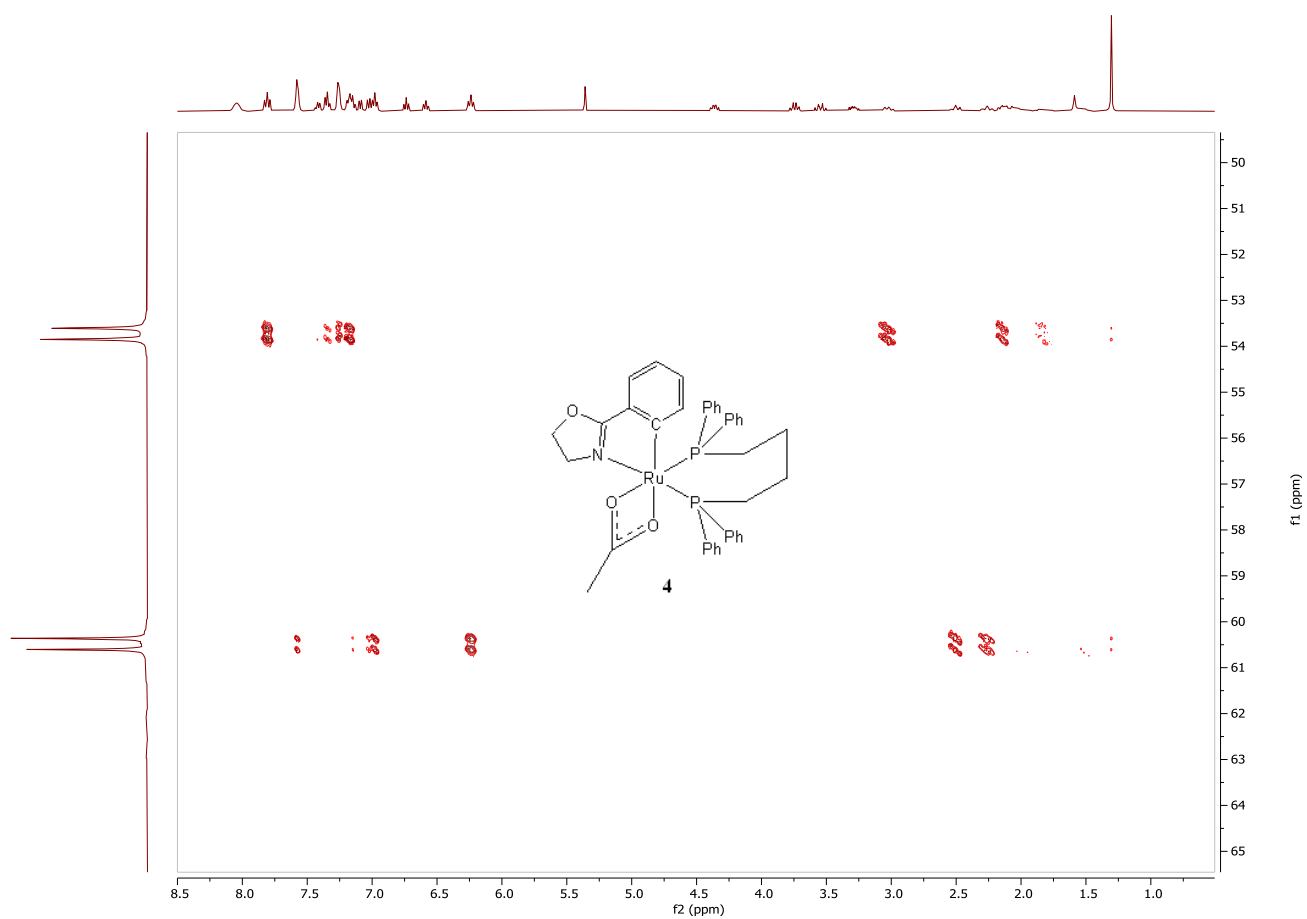

**Figure S29.**  $^1\text{H}$ - $^{31}\text{P}$  HMBC 2D NMR spectrum of  $[\text{Ru}(\mathbf{d})(\eta^2\text{-OAc})(\text{dppb})]$  (**4**) in  $\text{CD}_2\text{Cl}_2$  at 25 °C.

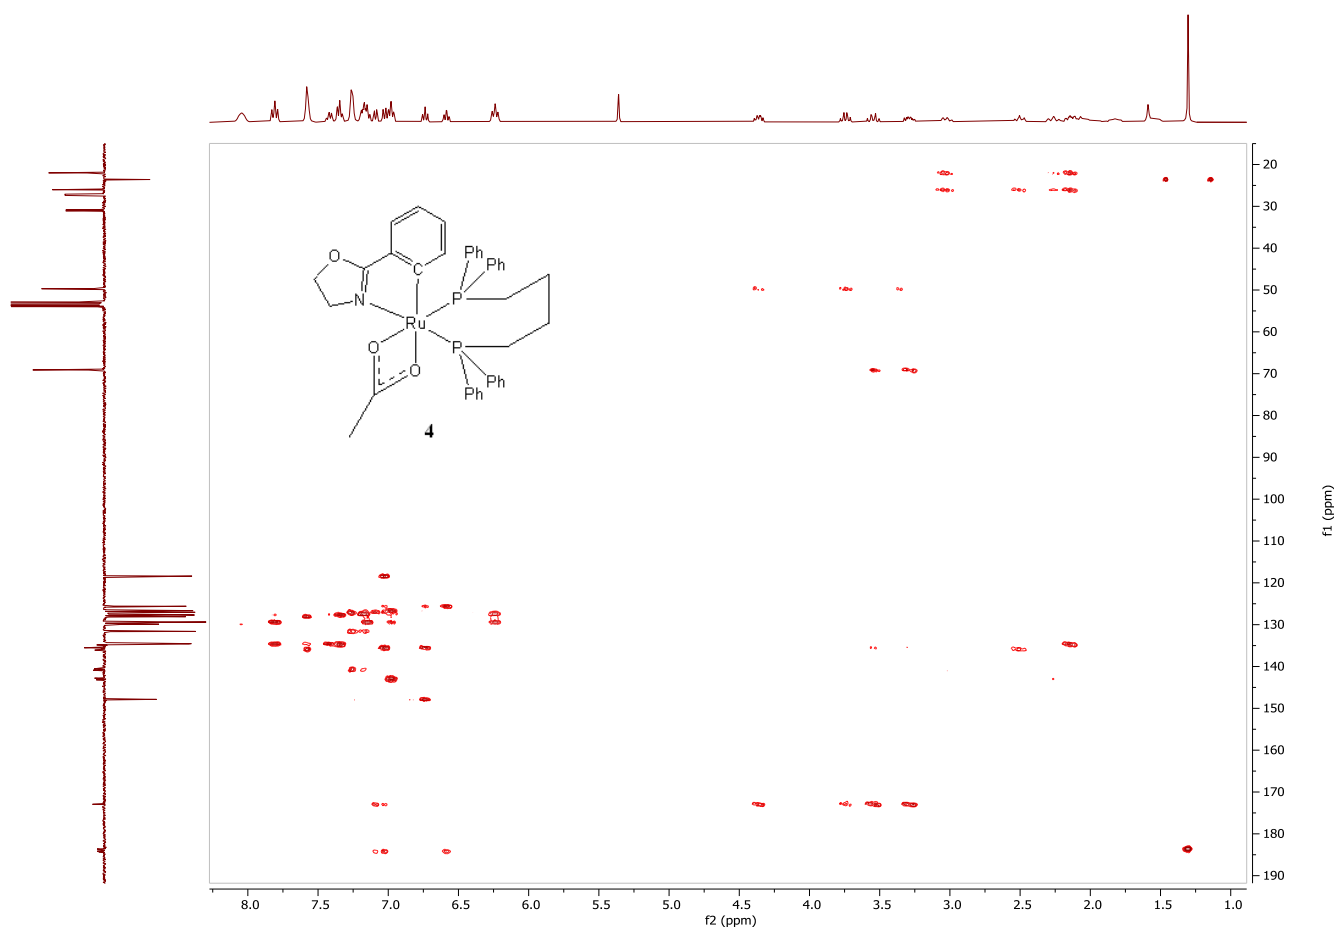

**Figure S30.**  $^1\text{H}$ - $^{13}\text{C}$  HMBC 2D NMR spectrum of  $[\text{Ru}(\mathbf{d})(\eta^2\text{-OAc})(\text{dppb})]$  (**4**) in  $\text{CD}_2\text{Cl}_2$  at 25 °C.

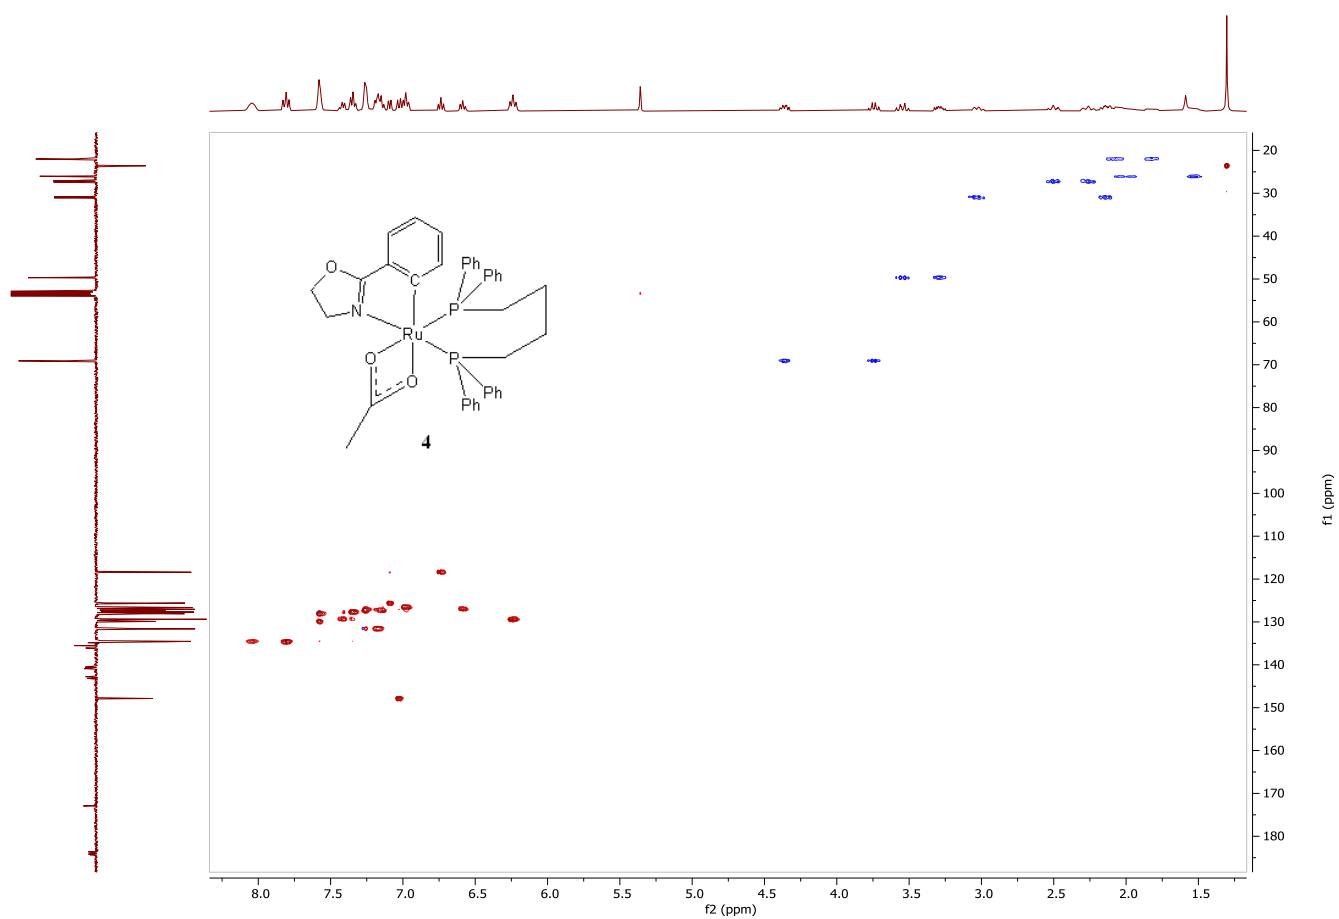

**Figure S31.**  $^1\text{H}$ - $^{13}\text{C}$  HSQC 2D NMR spectrum of  $[\text{Ru}(\mathbf{d})(\eta^2\text{-OAc})(\text{dppb})]$  (**4**) in  $\text{CD}_2\text{Cl}_2$  at 25 °C.

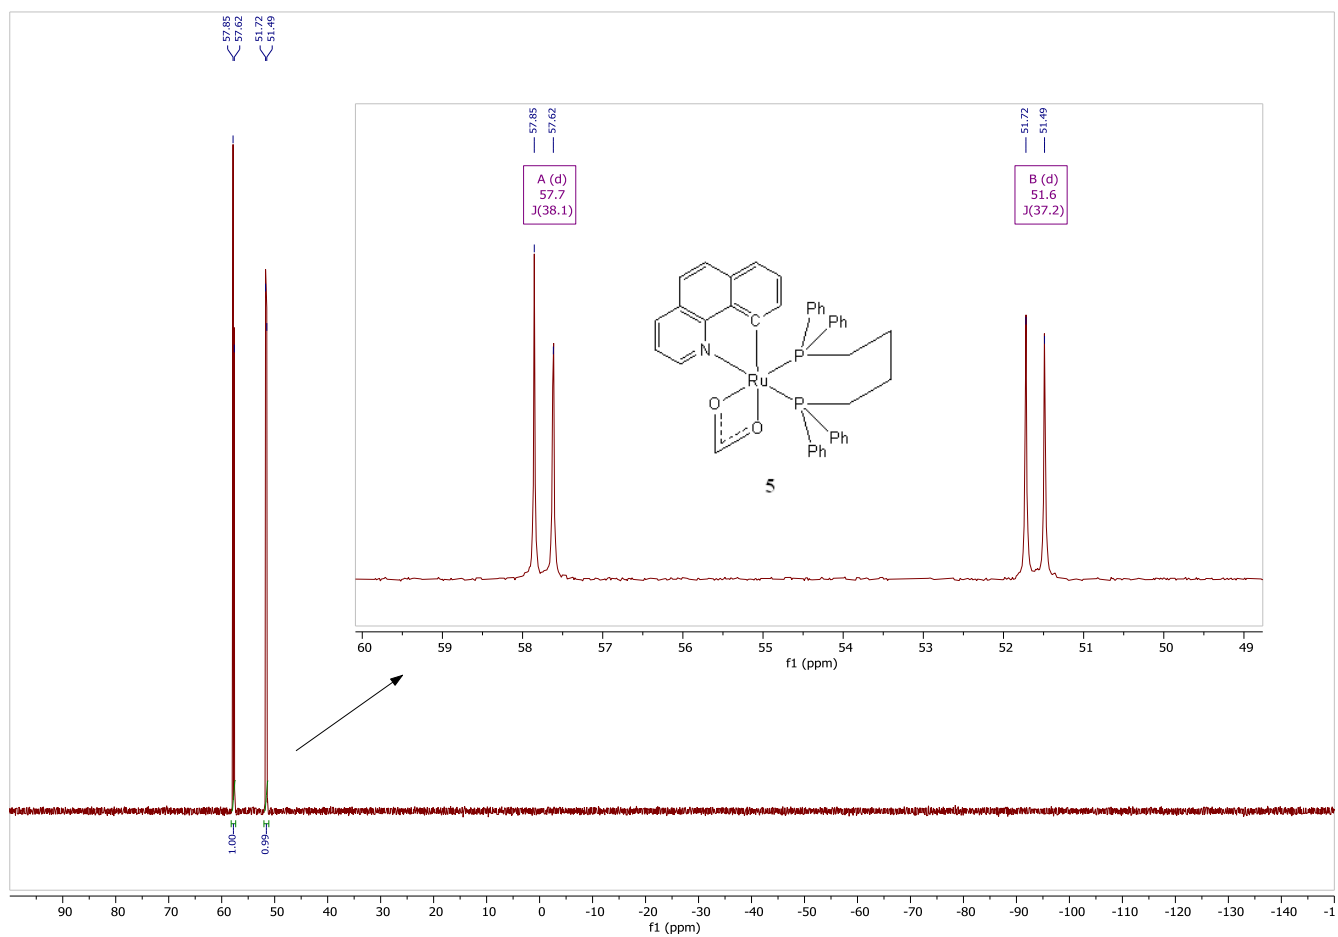

**Figure S32.**  $^{31}\text{P}\{^1\text{H}\}$  NMR spectrum (162.0 MHz) of  $[\text{Ru}(\mathbf{b})(\eta^2\text{-HCOO})(\text{dppb})]$  (**5**) in  $\text{CD}_2\text{Cl}_2$  at  $25^\circ\text{C}$ .

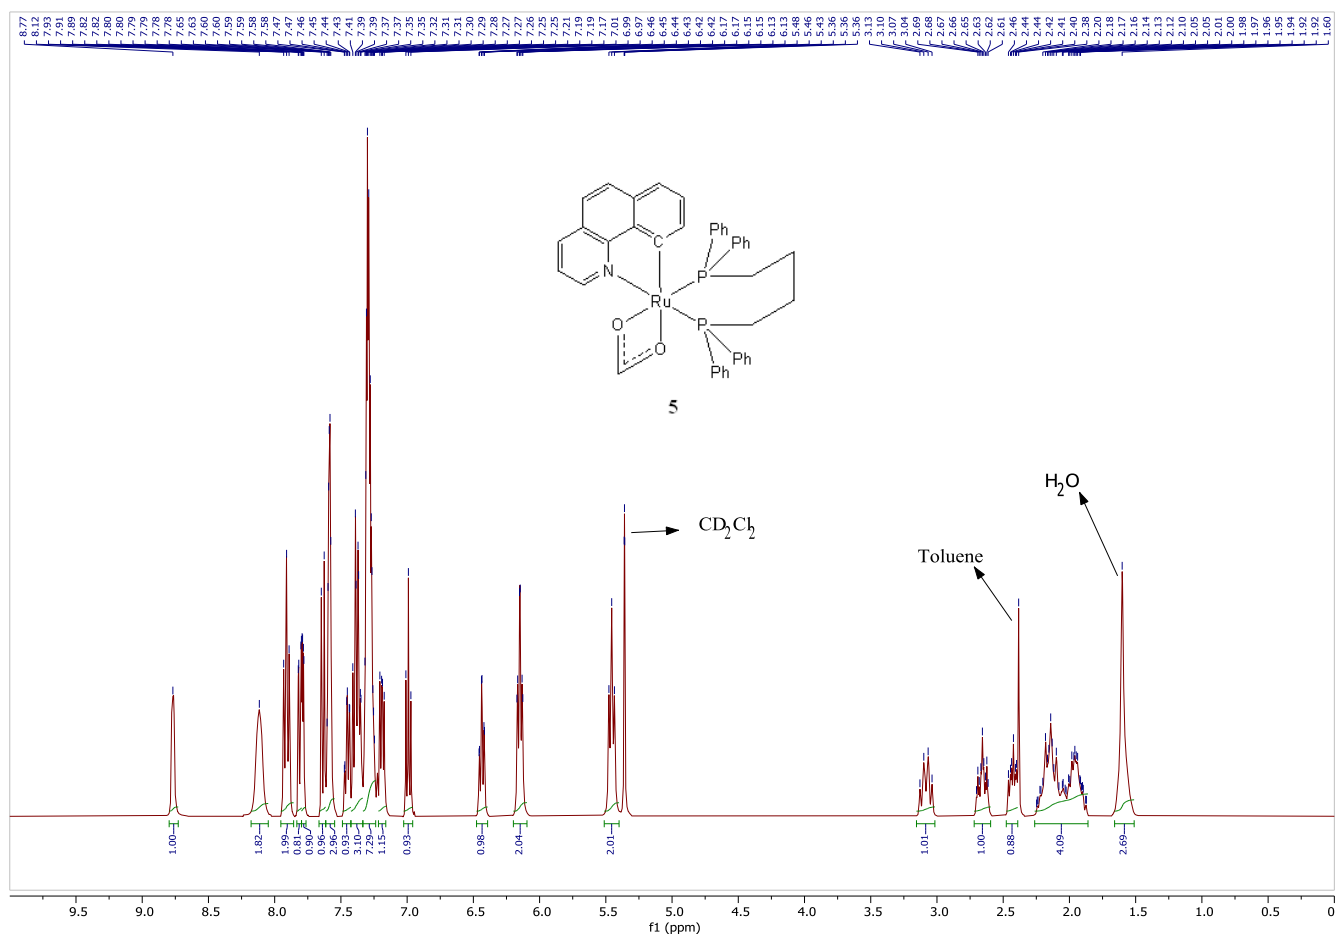

**Figure S33.**  $^1\text{H}$  NMR spectrum (400.1 MHz) of  $[\text{Ru}(\mathbf{b})(\eta^2\text{-HCOO})(\text{dppb})]$  (**5**) in  $\text{CD}_2\text{Cl}_2$  at  $25\text{ }^\circ\text{C}$ .

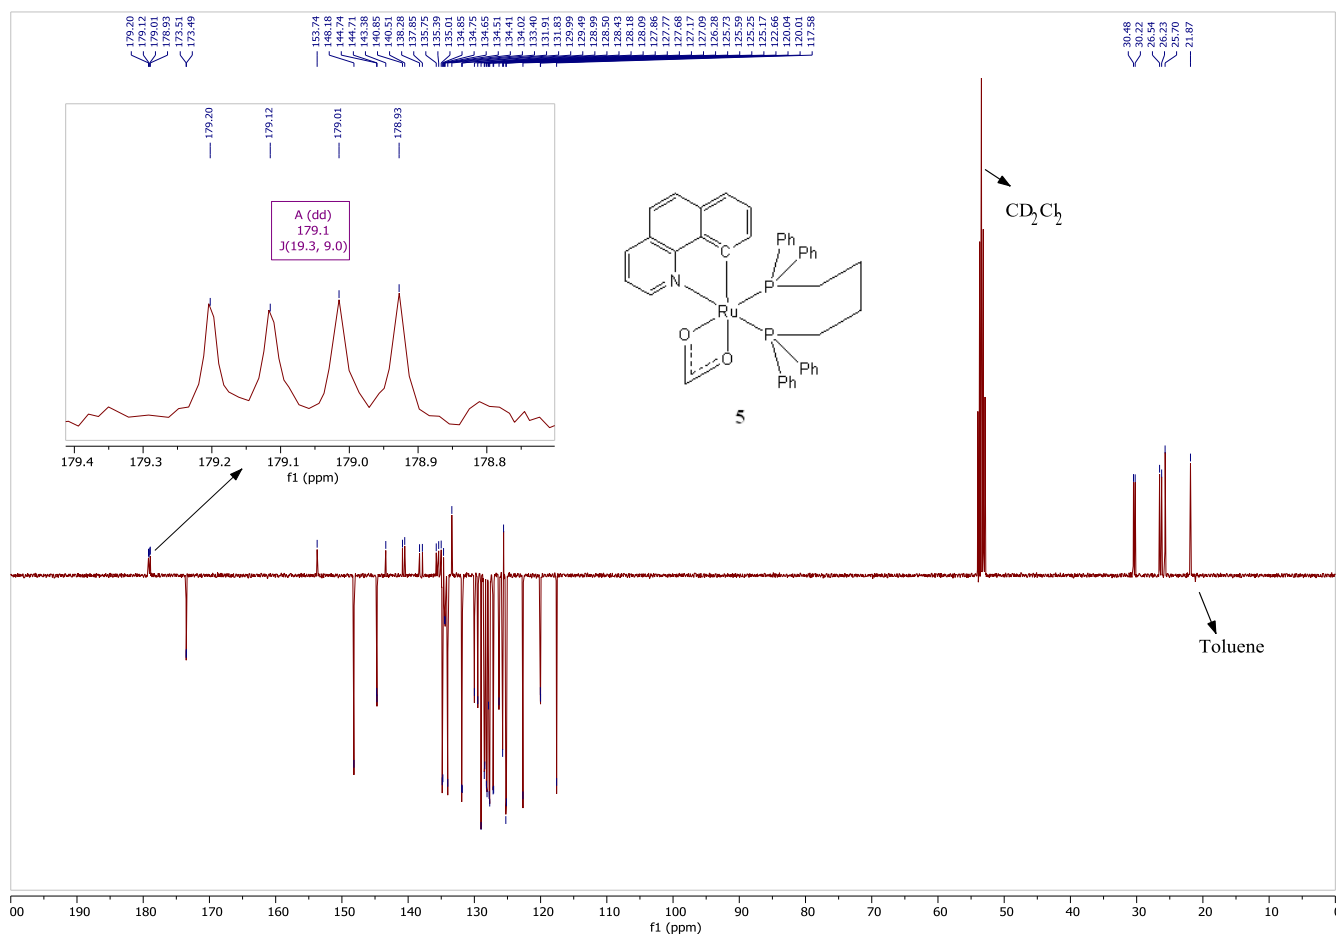

**Figure S34.**  $^{13}\text{C}\{^1\text{H}\}$  DEPTQ NMR spectrum (100.6 MHz) of  $[\text{Ru}(\mathbf{b})(\eta^2\text{-HCOO})(\text{dppb})]$  (**5**) in  $\text{CD}_2\text{Cl}_2$  at  $25^\circ\text{C}$ .



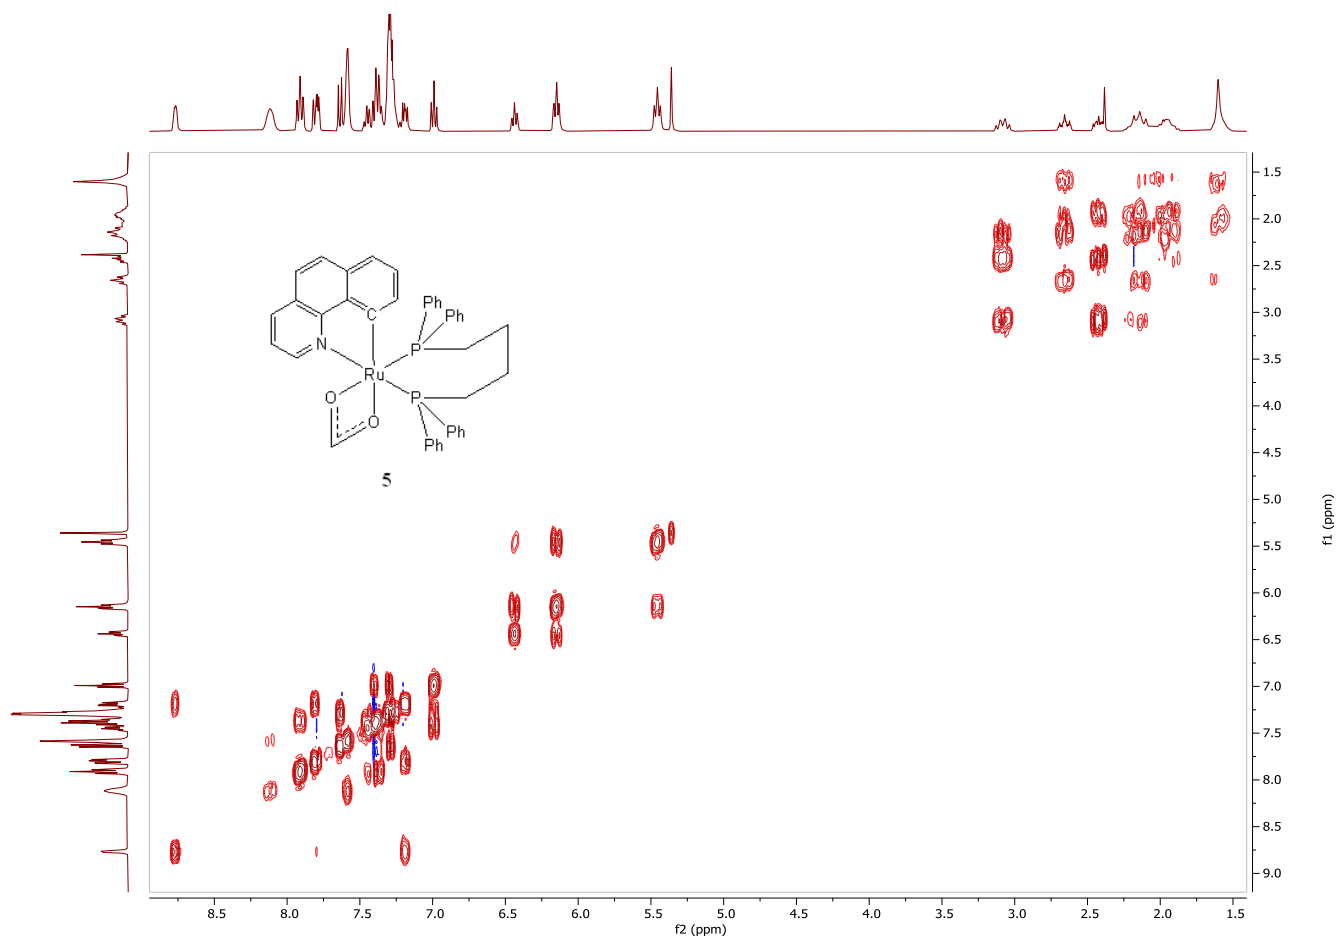

**Figure S35.** <sup>1</sup>H-<sup>1</sup>H COSY 2D NMR spectrum of [Ru(**b**)( $\eta^2$ -HCOO)(dppb)] (**4**) in CD<sub>2</sub>Cl<sub>2</sub> at 25 °C.

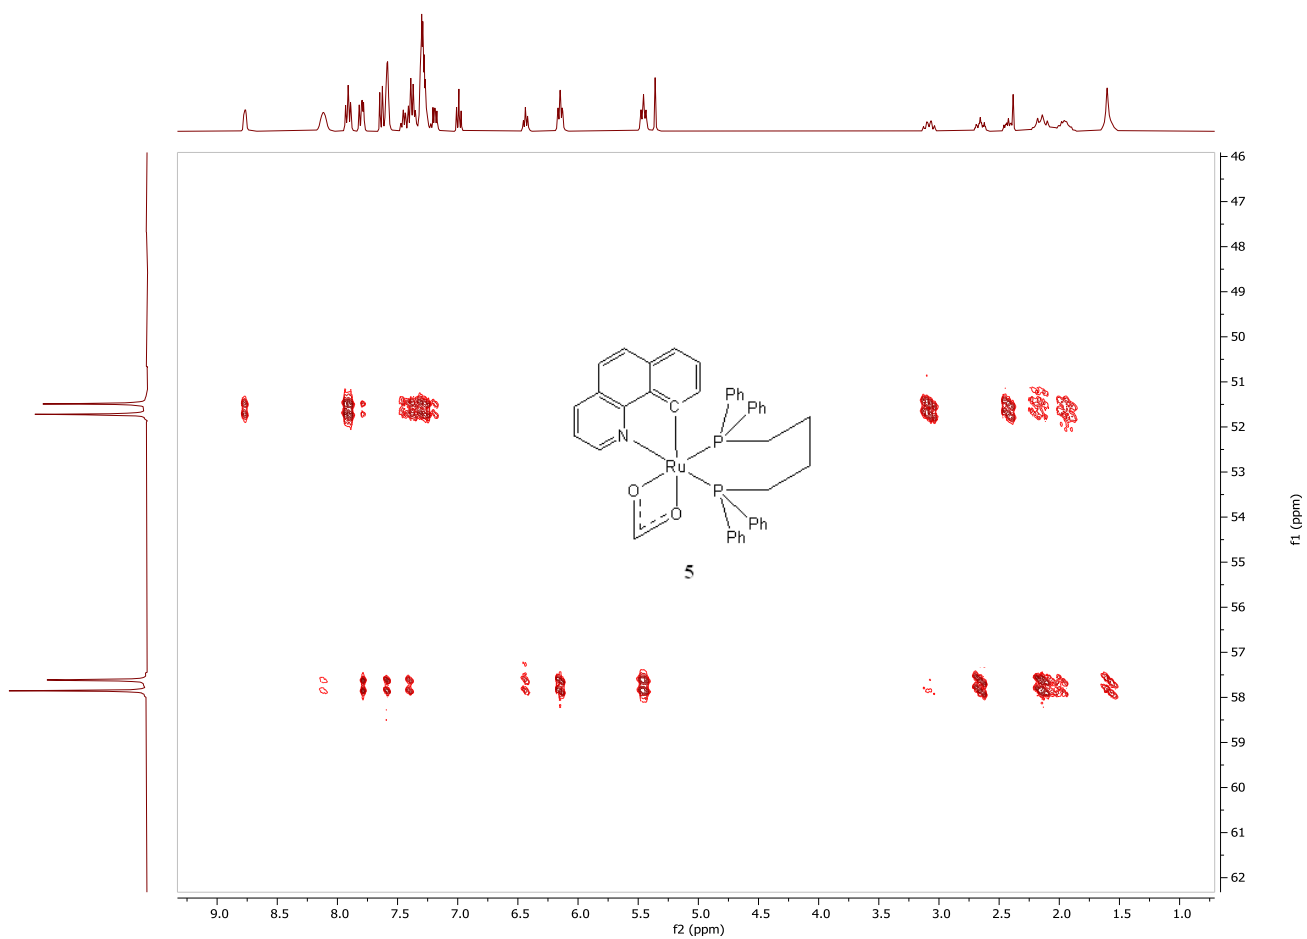

**Figure S36.**  $^1\text{H}$ - $^{31}\text{P}$  HMBC 2D NMR spectrum of  $[\text{Ru}(\mathbf{b})(\eta^2\text{-HCOO})(\text{dppb})]$  (**5**) in  $\text{CD}_2\text{Cl}_2$  at 25 °C.

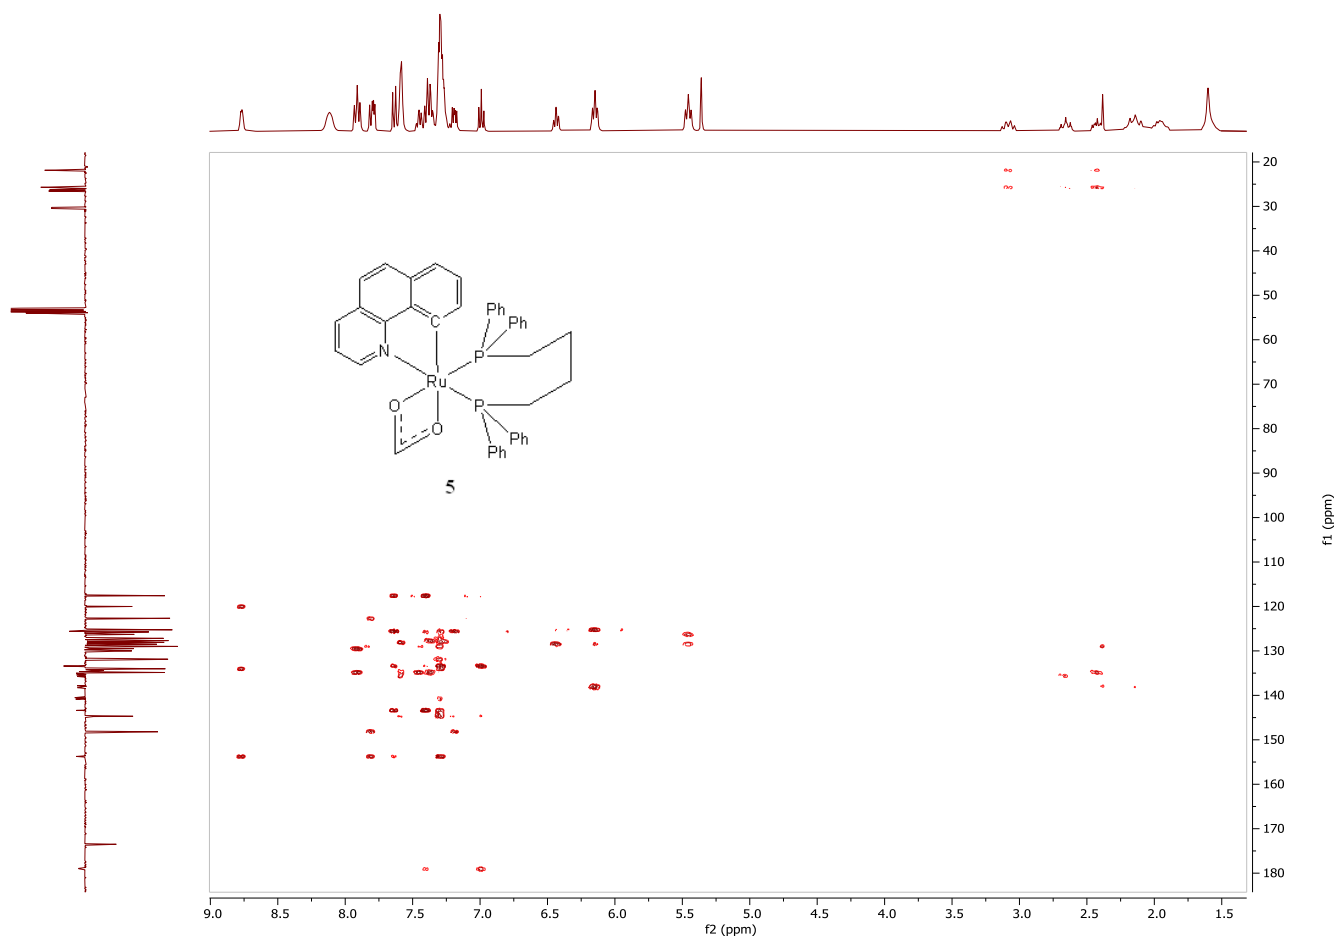

**Figure S37.**  $^1\text{H}$ - $^{13}\text{C}$  HMBC 2D NMR spectrum of  $[\text{Ru}(\mathbf{b})(\eta^2\text{-HCOO})(\text{dppb})]$  (**5**) in  $\text{CD}_2\text{Cl}_2$  at 25 °C.

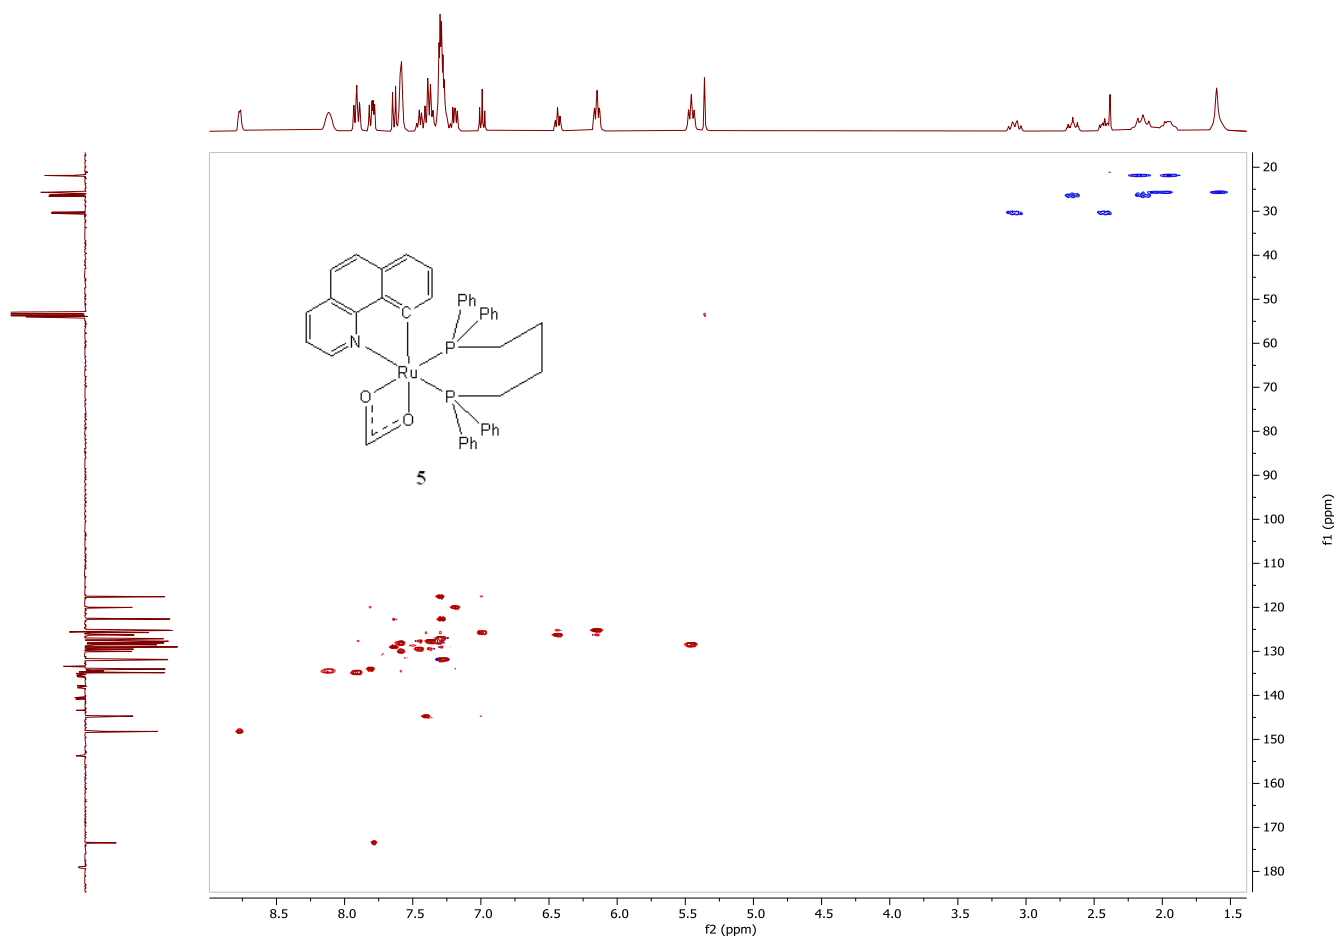

**Figure S38.**  $^1\text{H}$ - $^{13}\text{C}$  HSQC 2D NMR spectrum of  $[\text{Ru}(\text{b})(\eta^2\text{-HCOO})(\text{dppb})]$  (**5**) in  $\text{CD}_2\text{Cl}_2$  at 25 °C.

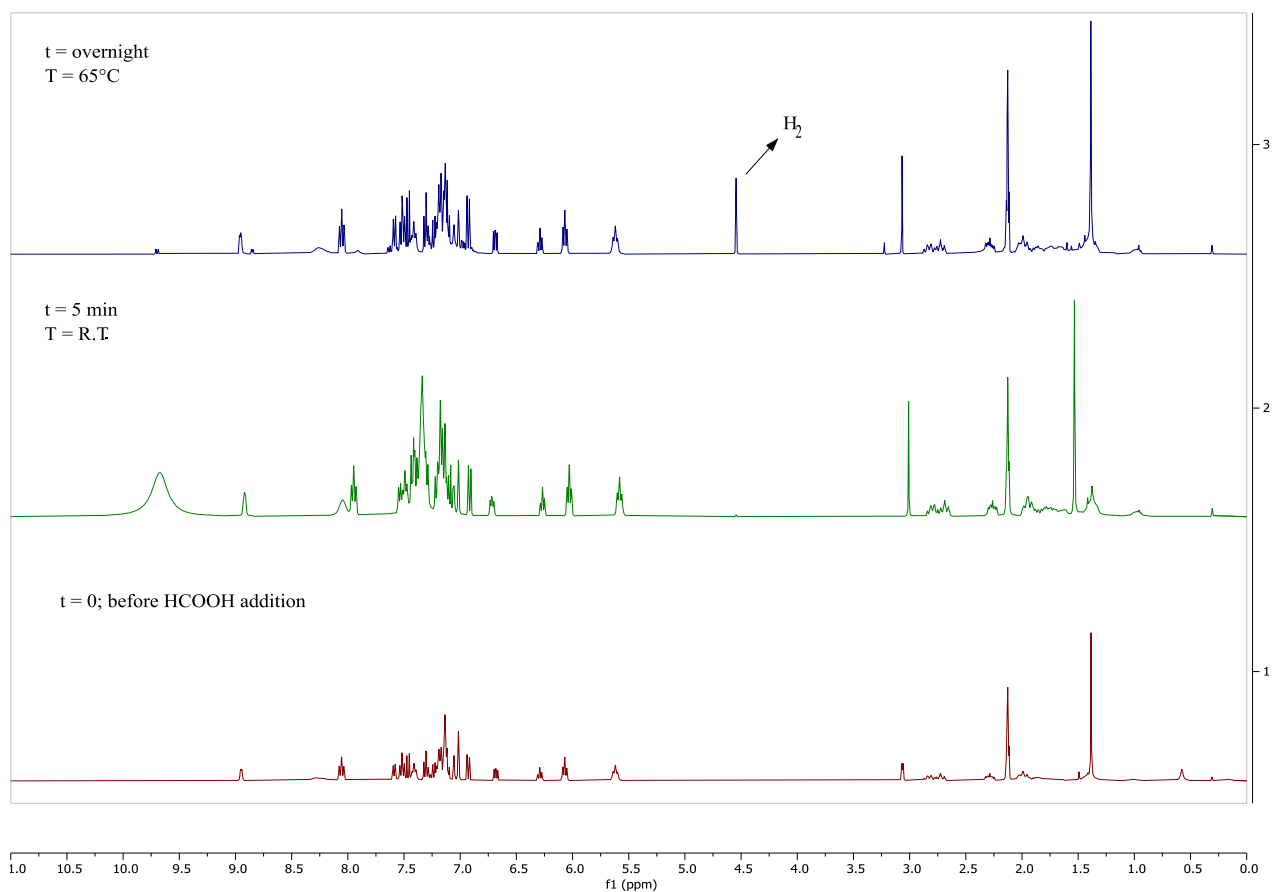

**Figure S39.** Evidence of  $\text{H}_2$  formation from the decomposition of  $\text{HCOOH}$  promoted by  $[\text{Ru}(\mathbf{b})(\eta^2\text{-OAc})(\text{dppb})]$  (**2**) in the  $^1\text{H}$  NMR spectra (400.1 MHz) in  $\text{toluene-}d^8$ .

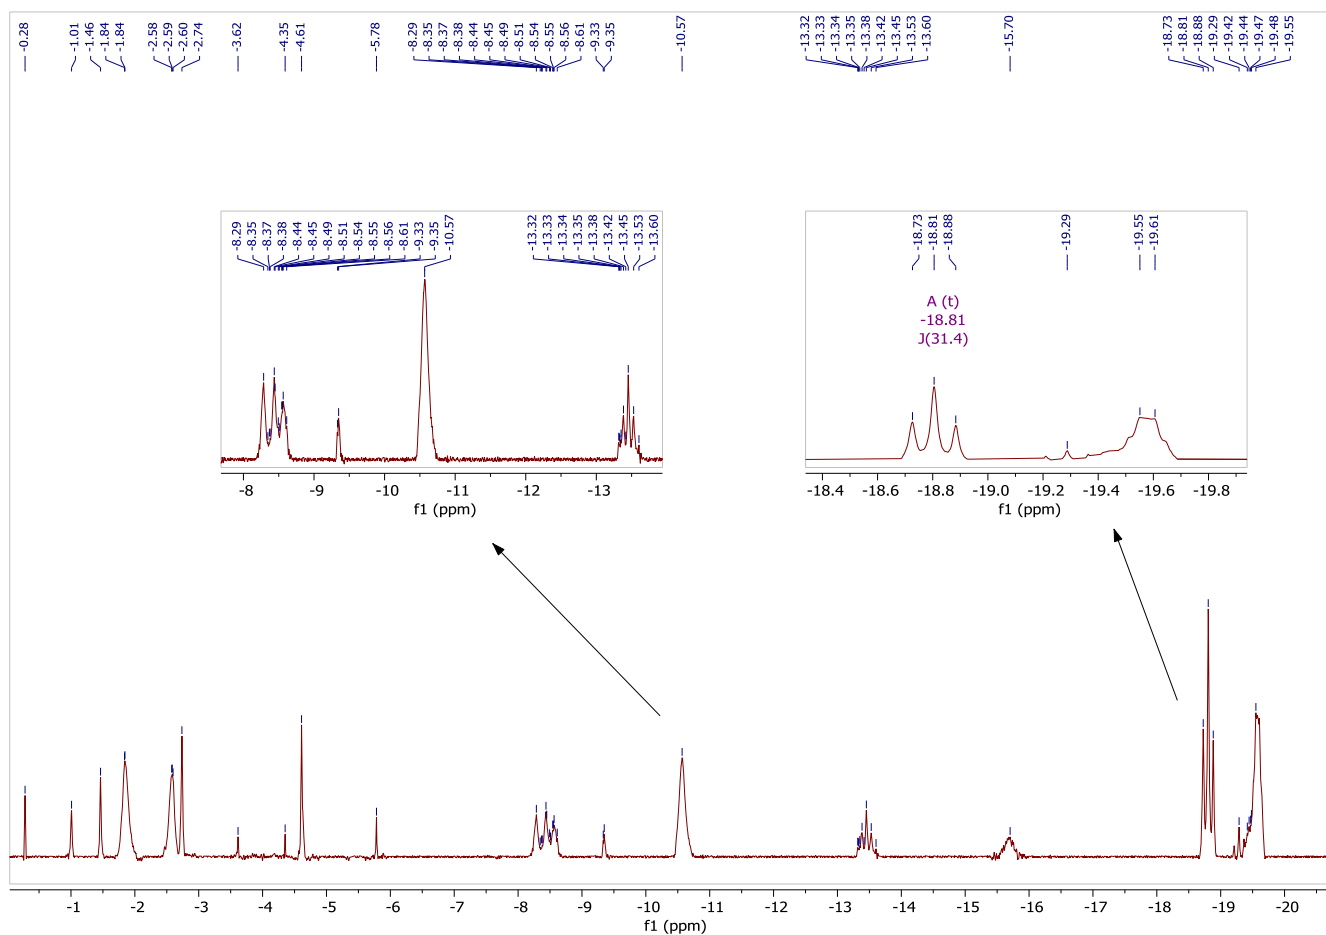

**Figure S40.** Evidence of formation of ruthenium monohydride species after treatment of  $[\text{Ru}(\mathbf{d})(\eta^2\text{-OAc})(\text{dppb})]$  (**4**) with  $\text{NaOiPr}$  (2 equiv) at reflux in the  $^1\text{H}$  NMR spectrum (400.1 MHz) in  $i\text{PrOH}/\text{toluene-}d^8$  (4:1 (v/v)).

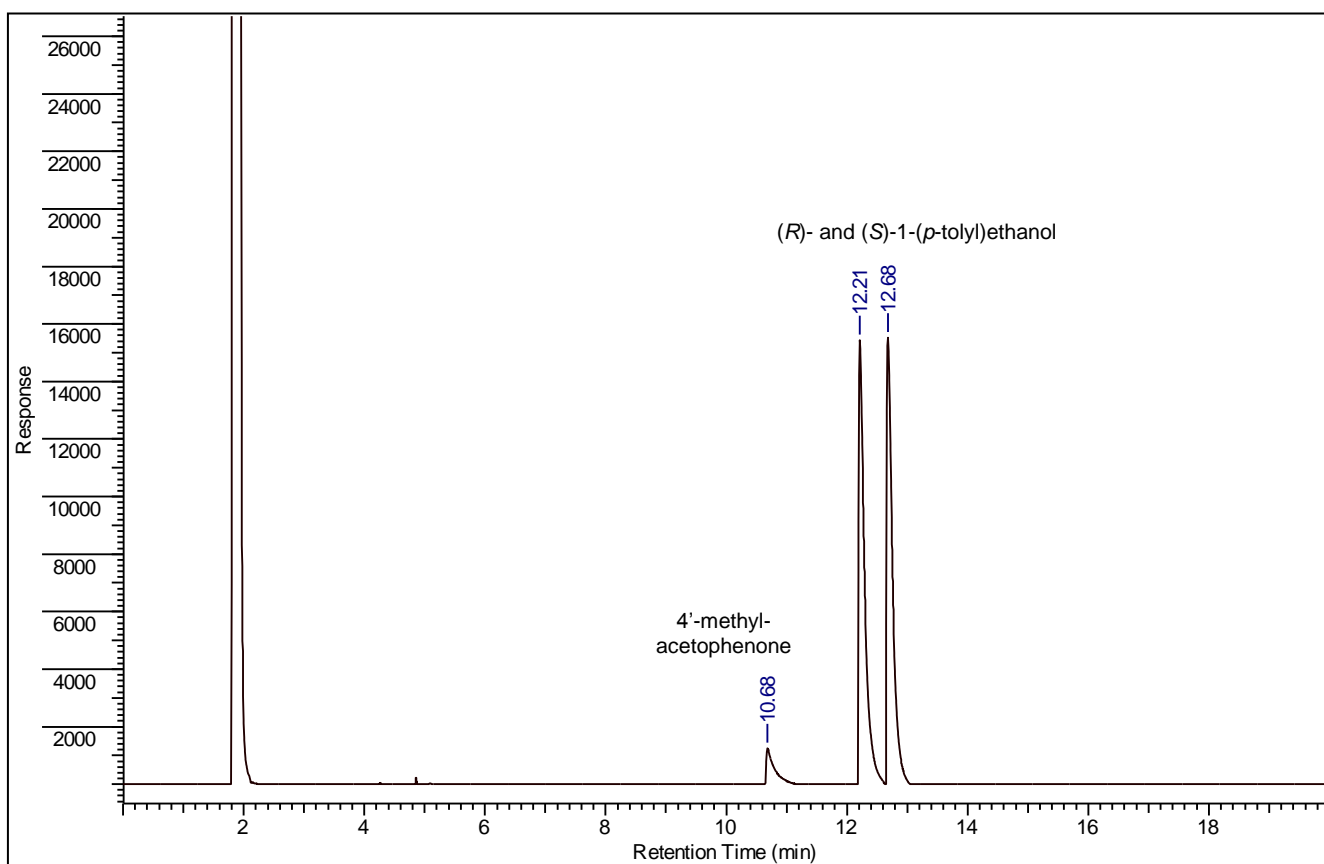

**Figure S41.** GC-FID chromatogram of the reaction mixture of the catalytic TH of 4'-methyl-acetophenone in 2-propanol at reflux and NaOiPr 2 mol% promoted by complex **3** at S/C 1000 after 30 min. GC analyses were performed with a Varian CP-3380 gas chromatograph equipped with a 25 m length MEGADEX-ETTBDMS- $\beta$  chiral column with hydrogen (5 psi) as the carrier gas and flame ionization detector (FID). The injector and detector temperature was 250 °C, with initial T = 95 °C ramped to 140 °C at 3 °C/min, then to 210 °C at 30 °C/min, which is maintained for other 3 min. for a total of 20 min of analysis.

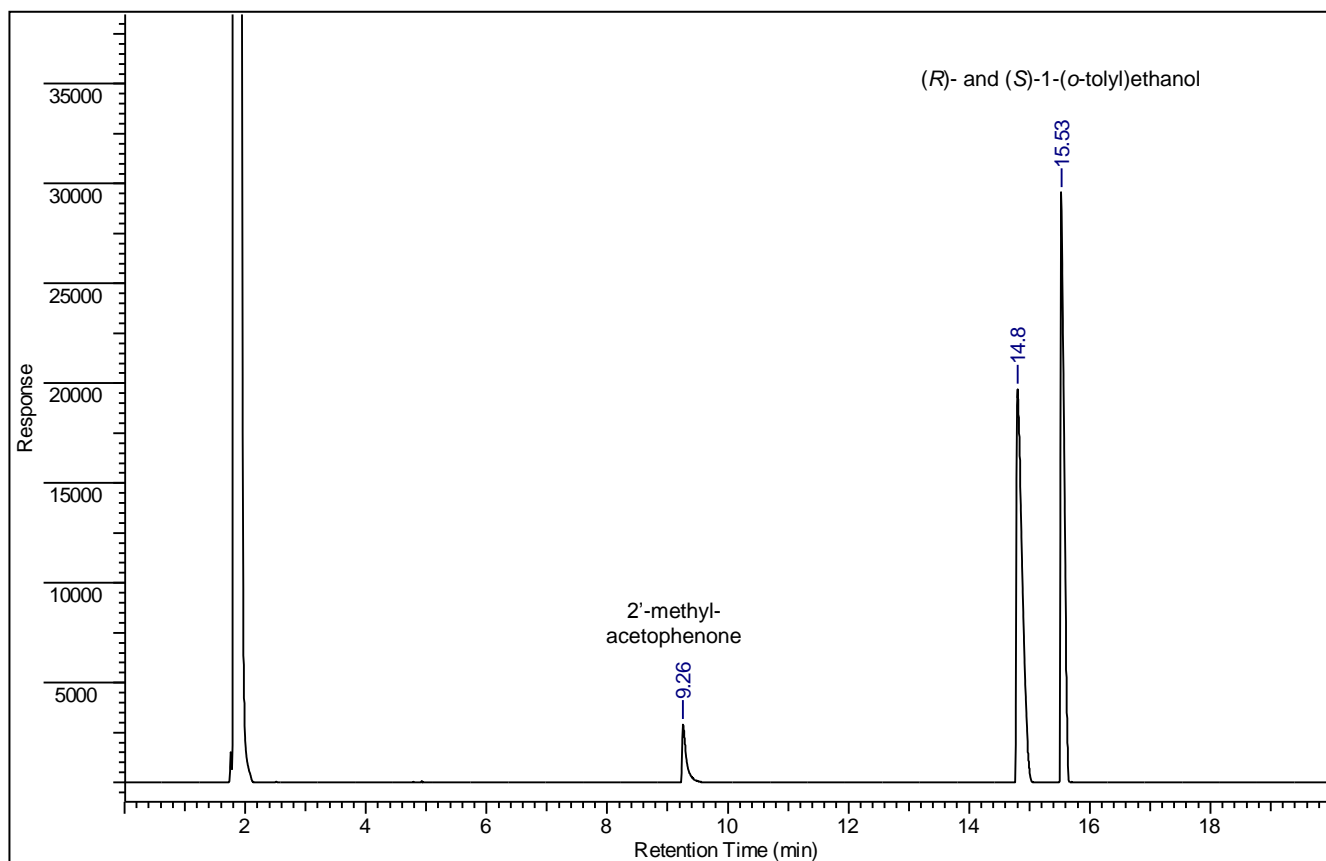

**Figure S42.** GC-FID chromatogram of the reaction mixture of the catalytic TH of 2'-methylacetophenone in 2-propanol at reflux and NaOiPr 2 mol% promoted by complex **3** at S/C 1000 after 30 min. GC analyses were performed with a Varian CP-3380 gas chromatograph equipped with a 25 m length MEGADEX-ETTBDMS- $\beta$  chiral column with hydrogen (5 psi) as the carrier gas and flame ionization detector (FID). The injector and detector temperature was 250 °C, with initial T = 95 °C ramped to 140 °C at 3 °C/min, then to 210 °C at 30 °C/min, which is maintained for other 3 min. for a total of 20 min of analysis.



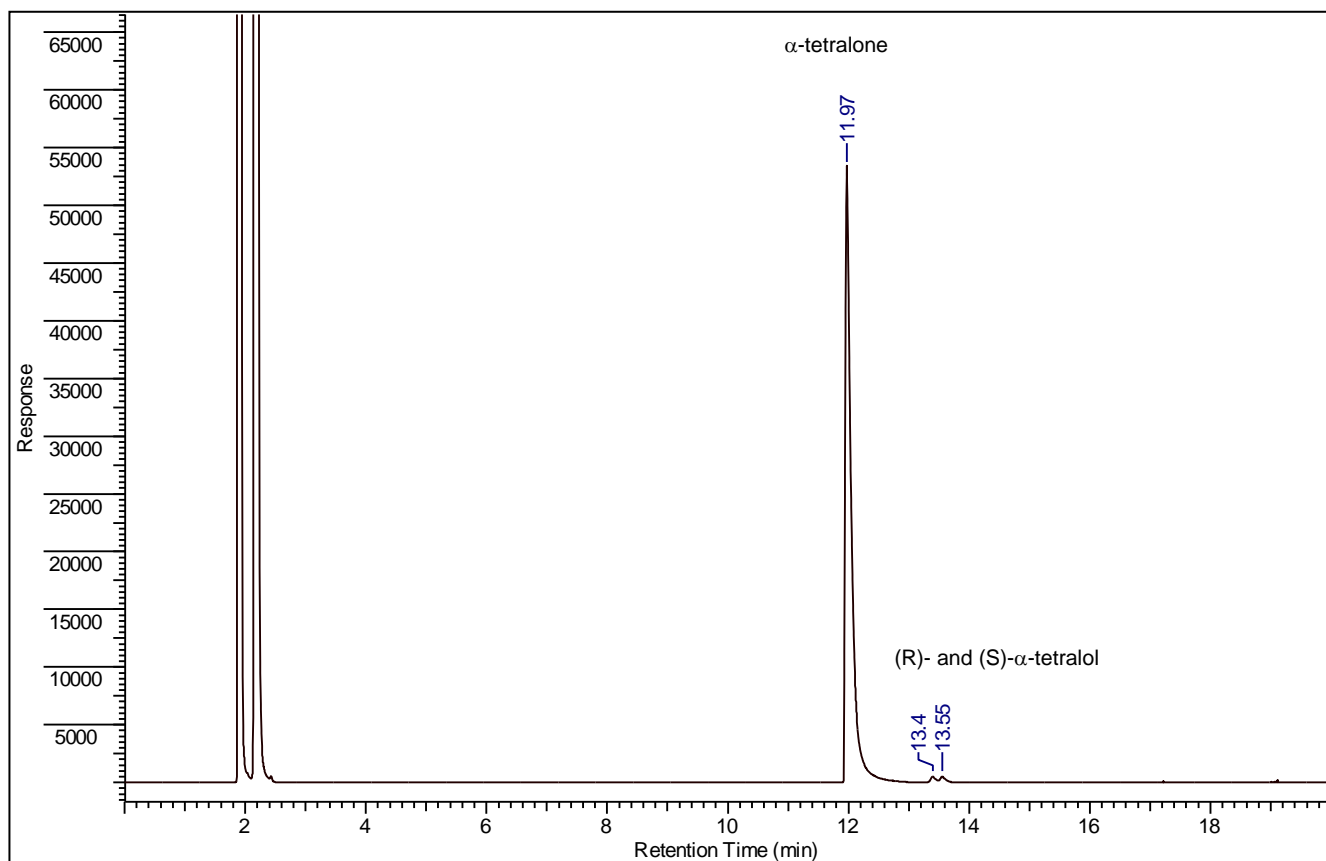

**Figure S43.** GC-FID chromatogram of the reaction mixture of the catalytic *Oppenauer*-type oxidation of *rac*- $\alpha$ -tetralol in toluene at reflux with KO $t$ Bu 5 mol% and in presence of acetone (10 equiv) promoted by complex **1** at S/C 1000 after 20 min. GC analyses were performed with a Varian CP-3380 gas chromatograph equipped with a 25 m length MEGADEX-ETTBDMS- $\beta$  chiral column with hydrogen (5 psi) as the carrier gas and flame ionization detector (FID). The injector and detector temperature was 250 °C, with initial T = 125 °C ramped to 155 °C at 2 °C/min, then to 195 °C at 20 °C/min, which is maintained for other 3 min. for a total of 20 min of analysis.

## General Procedure for the *Oppenauer*-type oxidation of secondary alcohols

The ruthenium catalyst solutions used for these reactions were prepared by dissolving the complexes (**1-4**, 2  $\mu\text{mol}$ ) in toluene (2 mL). The alcohol substrate (1.0 mmol) was dissolved in toluene (8.26 mL (when acetone was used as proton acceptor) or 8.38 mL (when cyclohexanone was used)), and the catalyst solution (1.0 mL, 1.0  $\mu\text{mol}$ ) and KO $t$ Bu (5.6 mg, 0.05 mmol) were added. After heating at reflux, acetone (740  $\mu\text{L}$ , 580 mg, 10 mmol) or cyclohexanone (621  $\mu\text{L}$ , 588.8 mg, 6.0 mmol) were added (final volume 10 mL). The reaction was sampled by removing an aliquot of the reaction mixture, which was quenched by addition of diethyl ether (1:1 v/v), filtered over a short silica pad and submitted to GC analysis. The ketone addition was considered as the start time of the reaction. The S/C molar ratio was 1000/1, whereas the base concentration was 5 mol% respect to the alcohol substrates (0.1 M). The same procedure was followed for the *Oppenauer*-type oxidation reactions with different S/C (250 - 1000), using the appropriate amount of catalyst.

For the isolation of ketones with **4**, the final mixture was filtered over a short silica pad and condensed under reduced pressure. The crude residue was dissolved with diethyl ether (5 mL) and the organic layer washed with a diluted solution of HCl (0.1 M; 3 x 3 mL), dried over anhydrous Na<sub>2</sub>SO<sub>4</sub>, and the solvent gently evaporated, affording the ketone products. In some cases, it was necessary to use a purification by flash silica gel column chromatography, using petroleum/ethyl acetate as eluent, to obtain the final products (yields: 44-95%). (1*R*)-(+)-camphor, on the other hand, was purified through a sublimation process. All compounds were characterized by <sup>1</sup>H and <sup>13</sup>C{<sup>1</sup>H} NMR.

### $\alpha$ -Tetralone:<sup>1</sup>

Clear amber oily liquid; yield: 95%.

<sup>1</sup>H NMR (400.1 MHz, CDCl<sub>3</sub>, 25 °C):  $\delta$  = 7.96 (dd, <sup>3</sup>*J*<sub>HH</sub> = 7.7 Hz, <sup>4</sup>*J*<sub>HH</sub> = 1.3 Hz, 1H; aromatic proton), 7.40 (dd, <sup>3</sup>*J*<sub>HH</sub> = 7.4 Hz, <sup>4</sup>*J*<sub>HH</sub> = 1.4 Hz, 1H; aromatic proton), 7.22 (t, <sup>3</sup>*J*<sub>HH</sub> = 7.6 Hz, 1H; aromatic proton), 7.17 (d, <sup>3</sup>*J*<sub>HH</sub> = 7.8 Hz, 1H; aromatic proton), 2.87 (t, <sup>3</sup>*J*<sub>HH</sub> = 6.0 Hz, 2H; CH<sub>2</sub>CH<sub>2</sub>CH<sub>2</sub>CO), 2.56 (t, <sup>3</sup>*J*<sub>HH</sub> = 6.6 Hz, 2H; CH<sub>2</sub>CH<sub>2</sub>CH<sub>2</sub>CO), 2.04 ppm (m, 2H; CH<sub>2</sub>CH<sub>2</sub>CH<sub>2</sub>CO).

<sup>13</sup>C{<sup>1</sup>H} NMR (100.6 MHz, CDCl<sub>3</sub>, 25 °C):  $\delta$  = 198.3 (s; CO), 144.5 (s; aromatic ipso carbon), 133.4 (s; aromatic carbon atom), 132.6 (s; aromatic ipso carbon), 128.8 (s; aromatic carbon atom), 127.1 (s; aromatic carbon atom), 126.6 (s; aromatic carbon atom), 39.1 (s; CH<sub>2</sub>CH<sub>2</sub>CH<sub>2</sub>CO), 29.6 (s; CH<sub>2</sub>CH<sub>2</sub>CH<sub>2</sub>CO), 23.3 ppm (s; CH<sub>2</sub>CH<sub>2</sub>CH<sub>2</sub>CO).

### **Benzophenone:**<sup>2</sup>

White crystals; m.p. 47-49 °C (47-49 °C, lit.); yield: 71%.

<sup>1</sup>H NMR (400.1 MHz, CDCl<sub>3</sub>, 25 °C): δ = 7.75 (dd, <sup>3</sup>J<sub>HH</sub> = 8.3 Hz, <sup>4</sup>J<sub>HH</sub> = 1.2 Hz, 4H; aromatic protons), 7.52 (tt, <sup>3</sup>J<sub>HH</sub> = 7.3 Hz, <sup>4</sup>J<sub>HH</sub> = 1.4 Hz, 2H; aromatic protons), 7.41 ppm (t, <sup>3</sup>J<sub>HH</sub> = 7.7 Hz, 4H; aromatic protons);

<sup>13</sup>C{<sup>1</sup>H} NMR (100.6 MHz, CDCl<sub>3</sub>, 25 °C): δ = 196.8 (s; CO), 137.6 (s; aromatic ipso carbons), 132.5 (s; aromatic carbon atoms), 130.1 (s; aromatic carbon atoms), 128.3 ppm (s; aromatic carbon atoms).

### **4'-Methylacetophenone:**<sup>3</sup>

Colorless liquid; yield: 94%.

<sup>1</sup>H NMR (400.1 MHz, CDCl<sub>3</sub>, 25 °C): δ = 7.85 (d, <sup>3</sup>J<sub>HH</sub> = 8.3 Hz, 2H; aromatic protons), 7.24 (d, <sup>3</sup>J<sub>HH</sub> = 8.3 Hz, 2H; aromatic protons), 2.56 (s, 3H; COCH<sub>3</sub>), 2.39 ppm (s, 3H, CH<sub>3</sub>);

<sup>13</sup>C{<sup>1</sup>H} NMR (100.6 MHz, CDCl<sub>3</sub>, 25 °C): δ = 197.8 (s; CO), 143.9 (s; aromatic ipso carbon), 134.7 (s; aromatic ipso carbon), 129.2 (s; aromatic carbon atoms), 128.4 (s; aromatic carbon atoms), 26.5 (s; COCH<sub>3</sub>), 21.6 ppm (s; CH<sub>3</sub>).

### **Propiophenone:**<sup>2</sup>

Colorless liquid; yield: 75%.

<sup>1</sup>H NMR (400.1 MHz, CDCl<sub>3</sub>, 25 °C): δ = 7.84 (m, 2H; aromatic protons), 7.44-7.39 (m, 1H; aromatic proton), 7.32 (m, 2H; aromatic protons), 2.86 (q, <sup>3</sup>J<sub>HH</sub> = 7.3 Hz, 2H; CH<sub>2</sub>CH<sub>3</sub>), 1.10 ppm (t, <sup>3</sup>J<sub>HH</sub> = 7.3 Hz, 3H; CH<sub>2</sub>CH<sub>3</sub>);

<sup>13</sup>C{<sup>1</sup>H} NMR (100.6 MHz, CDCl<sub>3</sub>, 25 °C): δ = 200.7 (s; CO), 136.9 (s; aromatic ipso carbon), 132.8 (s; aromatic carbon atom), 128.5 (s; aromatic carbon atom), 127.9 (s; aromatic carbon atom), 31.7 (s; CH<sub>2</sub>CH<sub>3</sub>), 8.2 ppm (s; CH<sub>2</sub>CH<sub>3</sub>).

### **2-heptanone:**<sup>4</sup>

Colorless liquid; yield: 83%.

<sup>1</sup>H NMR (400.1 MHz, CDCl<sub>3</sub>, 25 °C): δ = 2.41 (t, <sup>3</sup>J<sub>HH</sub> = 7.1 Hz, 2H; CH<sub>2</sub>COCH<sub>3</sub>), 2.12 (s, 3H; COCH<sub>3</sub>), 1.55 (m, 2H; CH<sub>2</sub>CH<sub>2</sub>CO), 1.27 (m, 4H; CH<sub>2</sub>), 0.89 ppm (t, <sup>3</sup>J<sub>HH</sub> = 6.5 Hz, 3H; CH<sub>2</sub>CH<sub>3</sub>).

<sup>13</sup>C{<sup>1</sup>H} NMR (100.6 MHz, CDCl<sub>3</sub>, 25 °C): δ = 209.4 (s; CO), 43.9 (s; CH<sub>2</sub>COCH<sub>3</sub>), 31.2 (s; CH<sub>2</sub>CH<sub>2</sub>CO), 29.9 (s; COCH<sub>3</sub>), 22.8 (s; CH<sub>2</sub>), 22.6 (s; CH<sub>2</sub>), 13.9 ppm (s; CH<sub>2</sub>CH<sub>3</sub>).

**(1R)-(+)-camphor:**<sup>5</sup>

Colorless solid; m.p. 176 °C (175-177 °C, lit.); yield: 44%.

<sup>1</sup>H NMR (400.1 MHz, CDCl<sub>3</sub>, 25 °C): δ = 2.26 (dt, <sup>2</sup>J<sub>HH</sub> = 18.2 Hz, <sup>3</sup>J<sub>HH</sub> = 3.9 Hz, 1H; CH<sub>2</sub>CO), 2.00 (t, <sup>3</sup>J<sub>HH</sub> = 4.5 Hz, 1H; CH<sub>2</sub>CH(CMe<sub>2</sub>)CH<sub>2</sub>), 1.86 (ddt, <sup>2</sup>J<sub>HH</sub> = 12.1 Hz, <sup>2</sup>J<sub>HH</sub> = 7.8 Hz, <sup>3</sup>J<sub>HH</sub> = 3.5 Hz, 1H; CH<sub>2</sub>CH<sub>2</sub>CH(CMe<sub>2</sub>)), 1.75 (d, <sup>2</sup>J<sub>HH</sub> = 18.2 Hz, 1H; CH<sub>2</sub>CO), 1.59 (td, <sup>2</sup>J<sub>HH</sub> = 12.1 Hz, <sup>3</sup>J<sub>HH</sub> = 11.0 Hz, <sup>3</sup>J<sub>HH</sub> = 3.3 Hz, 1H; CH<sub>2</sub>CH<sub>2</sub>(CMe)), 1.38-1.16 (m, 2H; CH<sub>2</sub>CH<sub>2</sub>(CMe)), 0.87 (s, 3H; C(CH<sub>3</sub>)<sub>2</sub>), 0.82 (s, 3H; CH<sub>3</sub>), 0.75 ppm (s, 3H; C(CH<sub>3</sub>)<sub>2</sub>).

<sup>13</sup>C{<sup>1</sup>H} NMR (100.6 MHz, CDCl<sub>3</sub>, 25 °C): δ = 219.7 (s; CO), 57.7 (s; CMe<sub>2</sub>), 46.8 (s; CMe), 43.3 (s; CH<sub>2</sub>CO), 43.0 (s; CH<sub>2</sub>CH(CMe<sub>2</sub>)CH<sub>2</sub>), 29.9 (s; CH<sub>2</sub>(CMe)), 27.1 (s; CH<sub>2</sub>CH(CMe<sub>2</sub>)CH<sub>2</sub>), 19.8 (s; C(CH<sub>3</sub>)<sub>2</sub>), 19.2 (s; C(CH<sub>3</sub>)<sub>2</sub>), 9.3 ppm (s; C(CH<sub>3</sub>)).

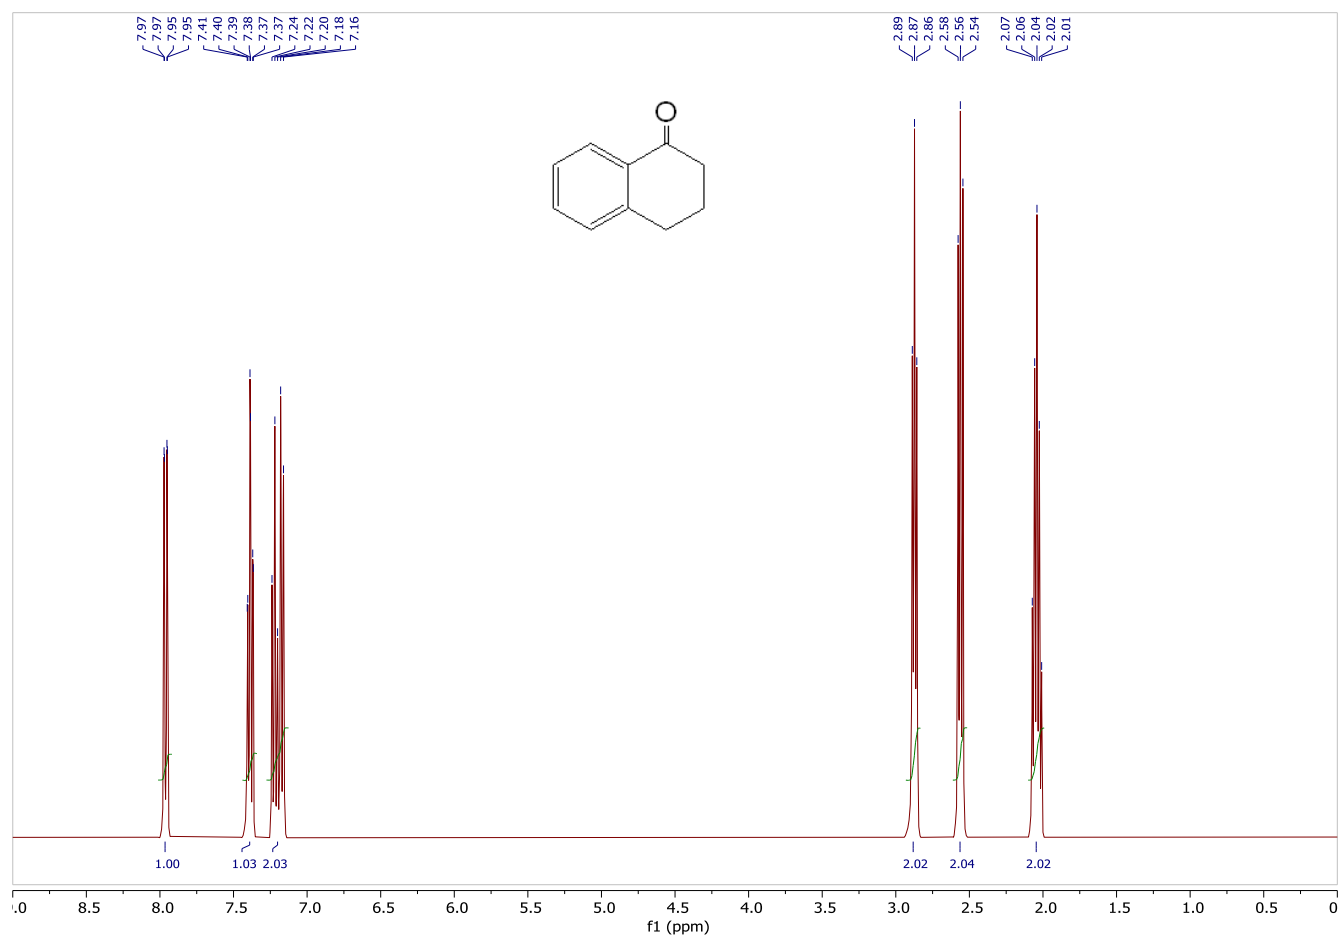

**Figure S44.** <sup>1</sup>H NMR spectrum (400.1 MHz) of α-tetralone obtained from catalytic *Oppenauer*-type oxidation of α-tetralol in CDCl<sub>3</sub> at 25 °C.

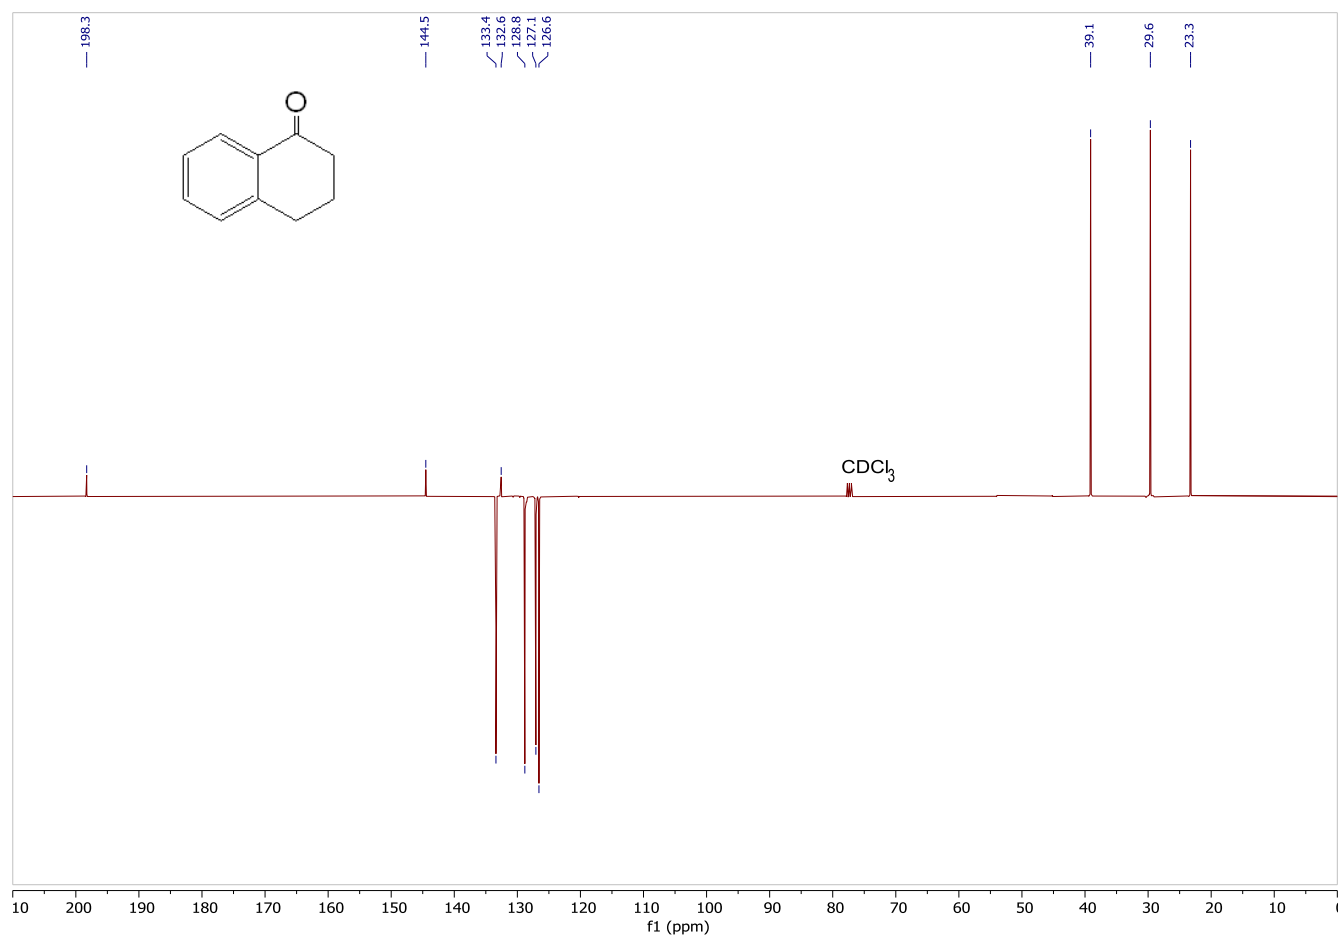

**Figure S45.**  $^{13}\text{C}\{^1\text{H}\}$  DEPTQ NMR spectrum (100.6 MHz) of  $\alpha$ -tetralone obtained from catalytic *Oppenauer*-type oxidation of  $\alpha$ -tetralol in  $\text{CDCl}_3$  at 25 °C.

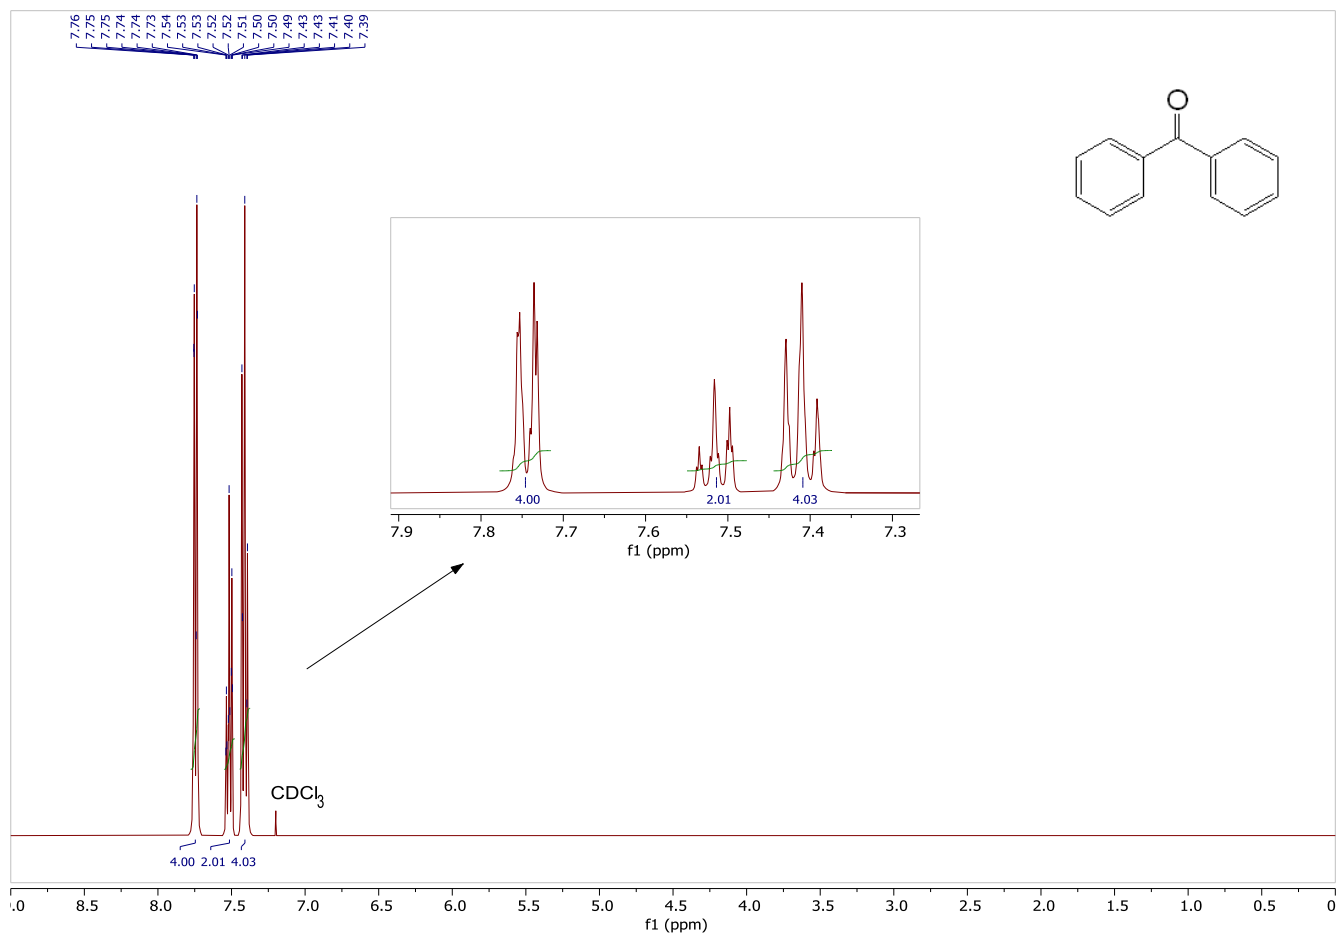

**Figure S46.**  $^1\text{H}$  NMR spectrum (400.1 MHz) of benzophenone obtained from catalytic *Oppenauer*-type oxidation of benzhydrol in  $\text{CDCl}_3$  at 25 °C.

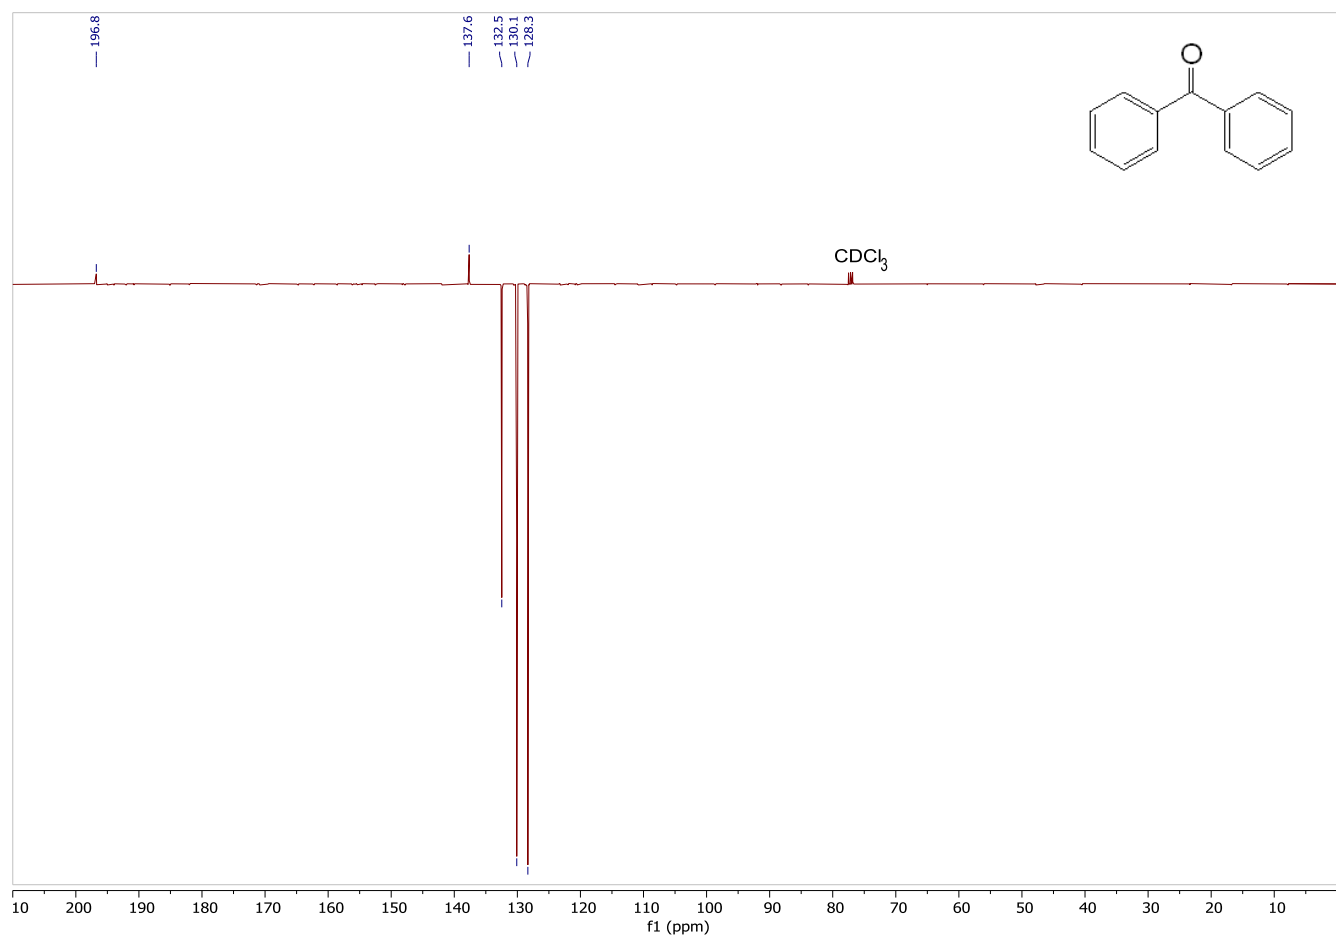

**Figure S47.**  $^{13}\text{C}\{^1\text{H}\}$  DEPTQ NMR spectrum (100.6 MHz) of benzophenone obtained from catalytic *Oppenauer*-type oxidation of benzhydrol in  $\text{CDCl}_3$  at 25 °C.



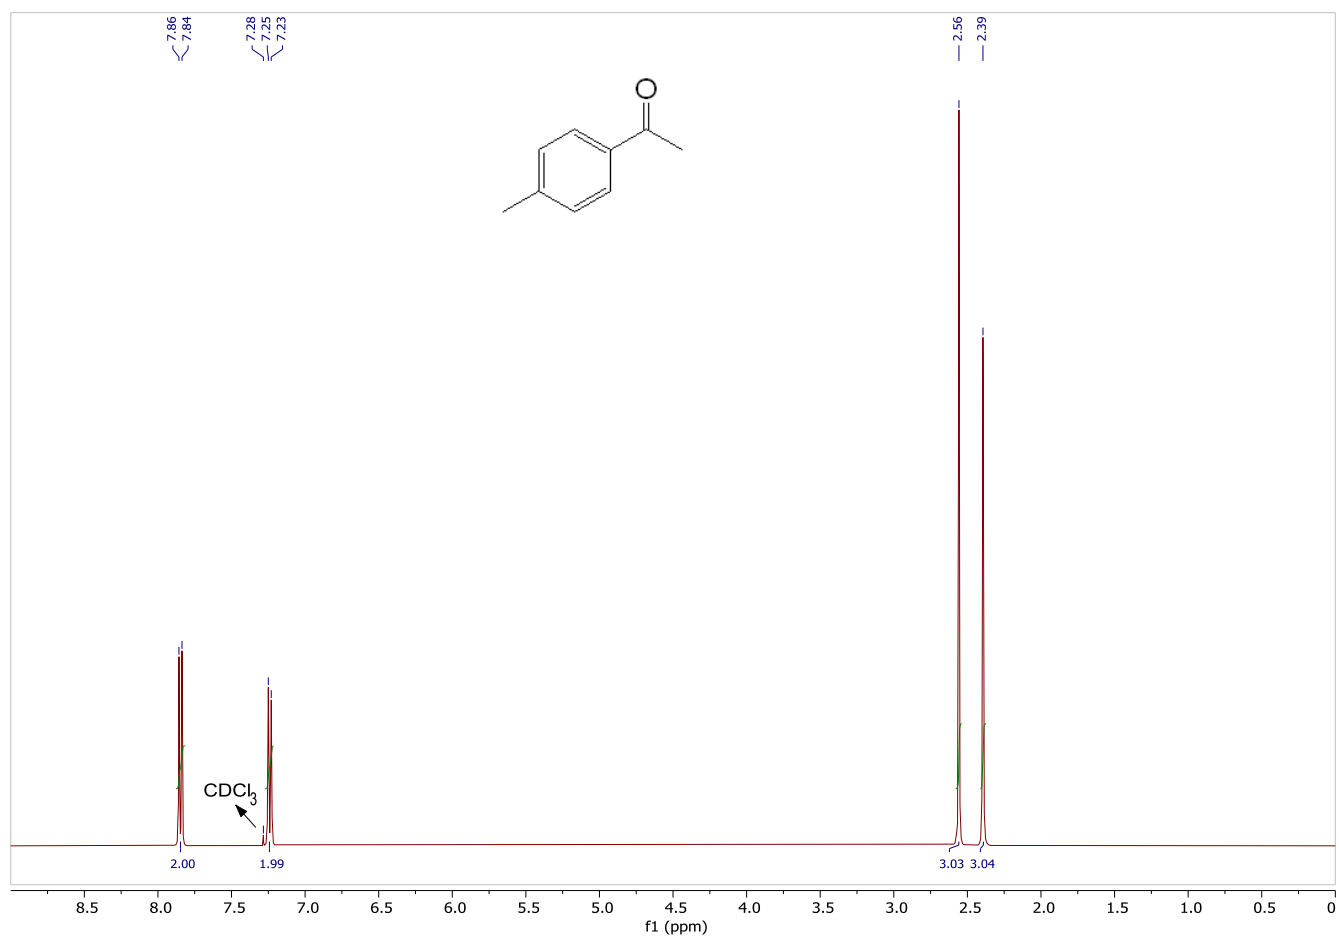

**Figure S48.** <sup>1</sup>H NMR spectrum (400.1 MHz) of 4'-methylacetophenone obtained from catalytic *Oppenauer*-type oxidation of 1-(*p*-tolyl)ethanol in CDCl<sub>3</sub> at 25 °C.

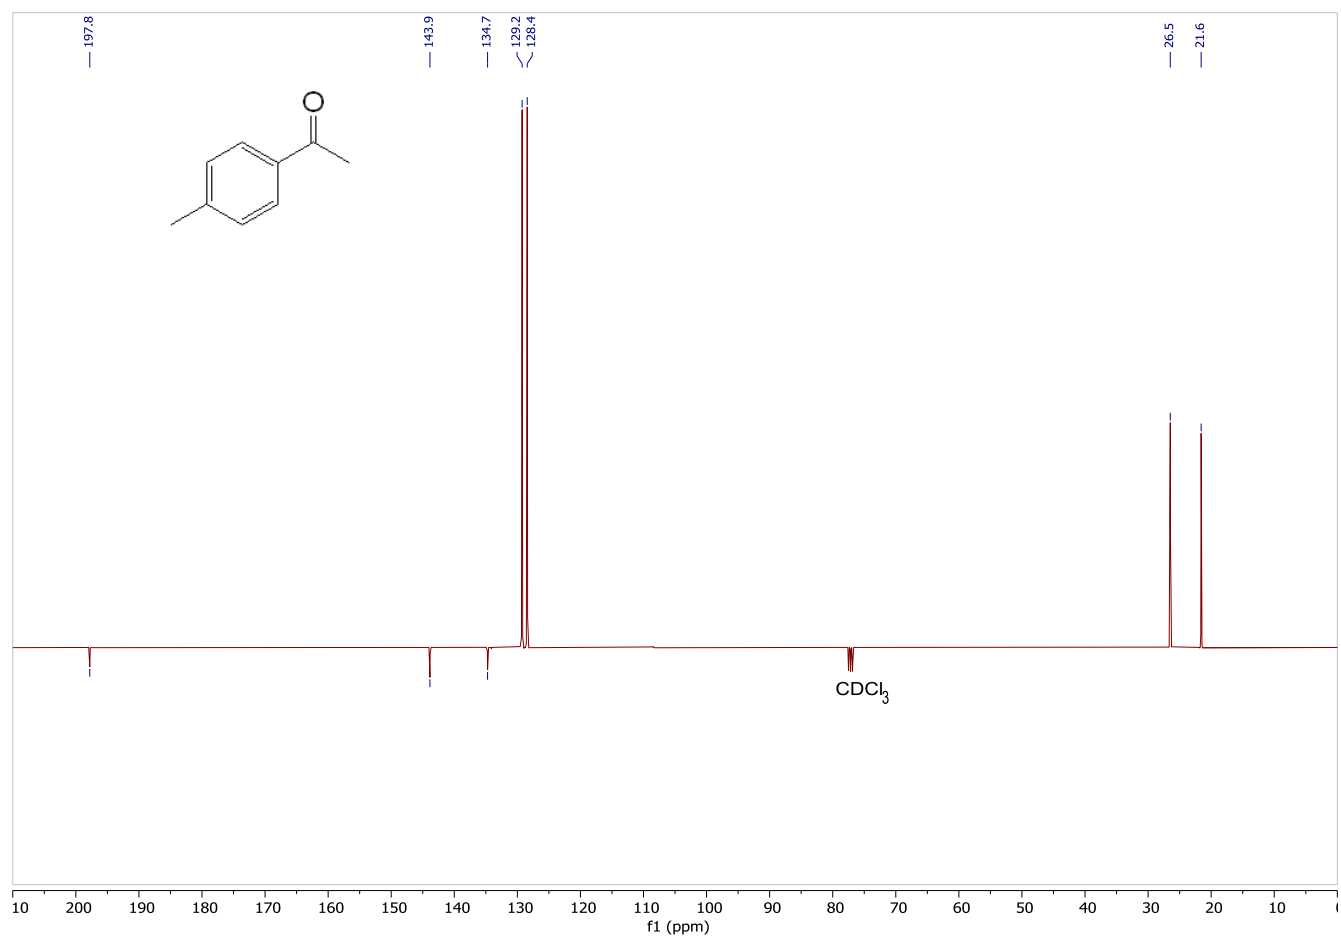

**Figure S49.**  $^{13}\text{C}\{^1\text{H}\}$  DEPTQ NMR spectrum (100.6 MHz) of 4'-methylacetophenone obtained from catalytic *Oppenauer*-type oxidation of 1-(*p*-tolyl)ethanol in  $\text{CDCl}_3$  at 25 °C.

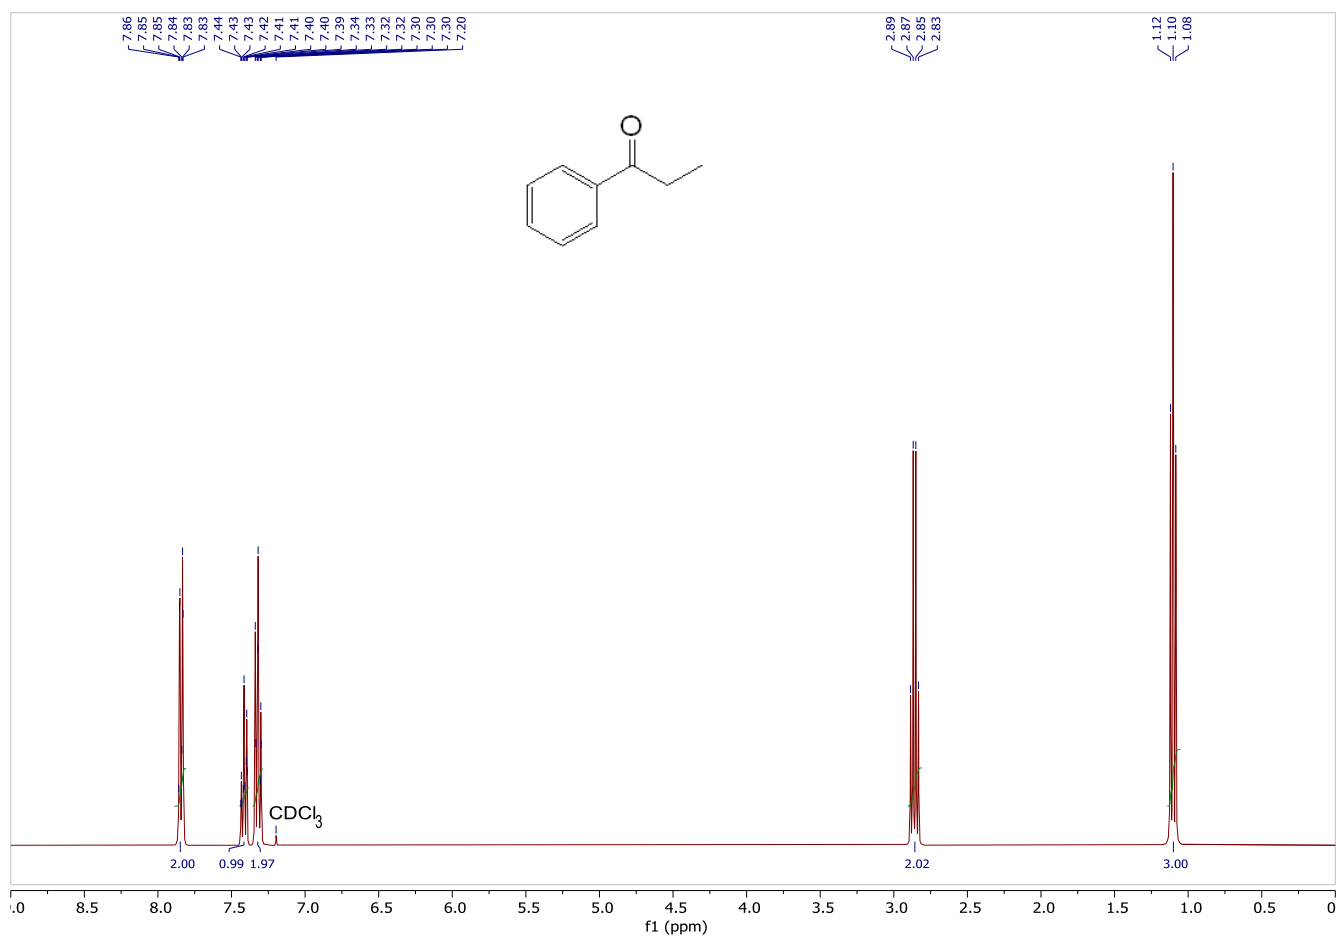

**Figure S50.** <sup>1</sup>H NMR spectrum (400.1 MHz) of propiophenone obtained from catalytic *Oppenauer*-type oxidation of 1-phenyl-1-propanol in CDCl<sub>3</sub> at 25 °C.

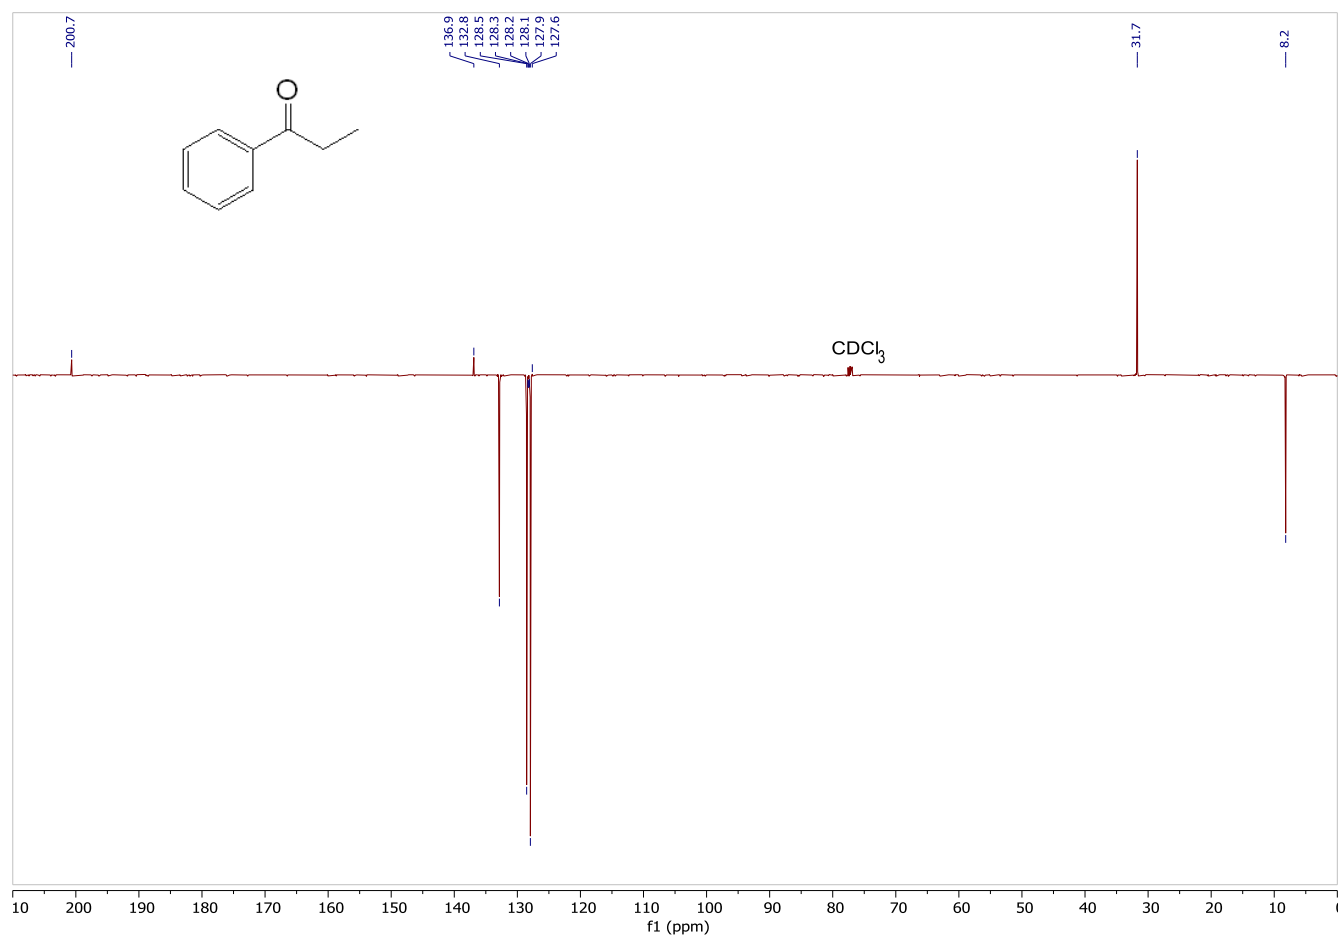

**Figure S51.**  $^{13}\text{C}\{^1\text{H}\}$  DEPTQ NMR spectrum (100.6 MHz) of propiophenone obtained from catalytic *Oppenauer*-type oxidation of 1-phenyl-1-propanol in  $\text{CDCl}_3$  at 25 °C.

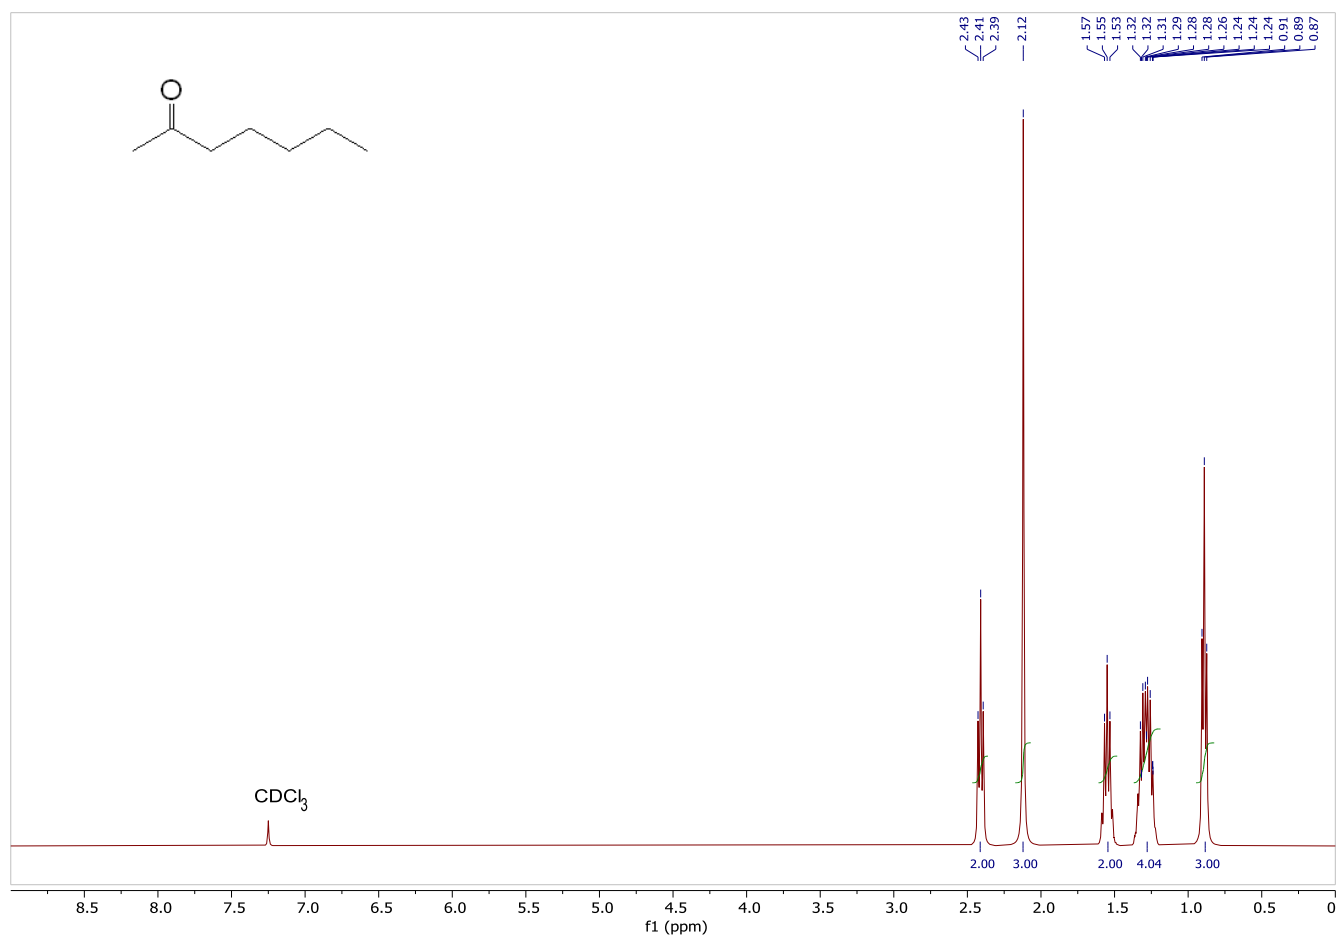

**Figure S52.** <sup>1</sup>H NMR spectrum (400.1 MHz) of 2-heptanone obtained from catalytic *Oppenauer*-type oxidation of 2-heptanol in CDCl<sub>3</sub> at 25 °C.

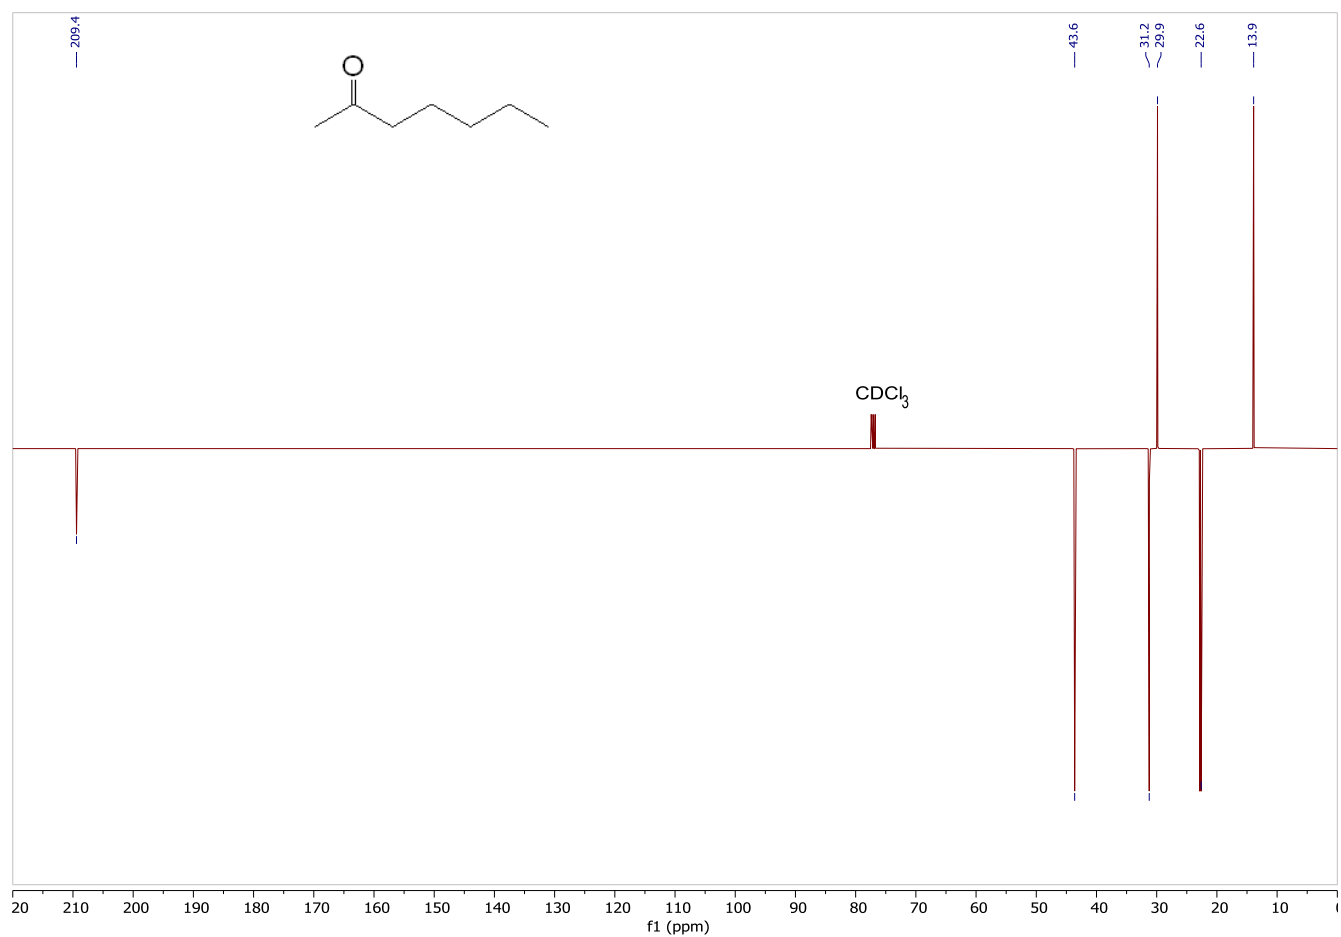

**Figure S53.**  $^{13}\text{C}\{^1\text{H}\}$  DEPTQ NMR spectrum (100.6 MHz) of 2-heptanone obtained from catalytic *Oppenauer*-type oxidation of 2-heptanol in  $\text{CDCl}_3$  at 25 °C.

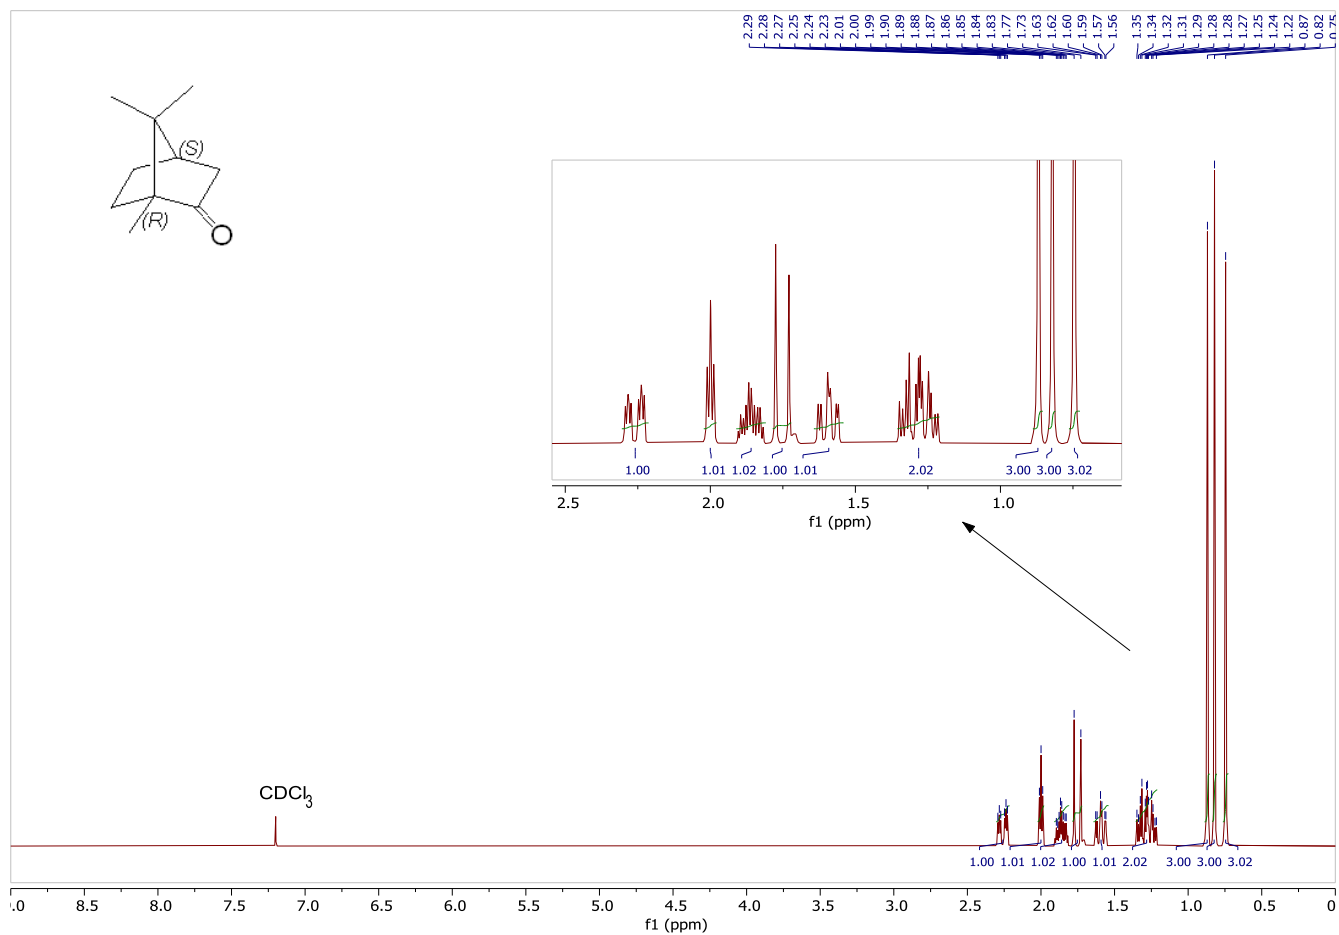

**Figure S54.** <sup>1</sup>H NMR spectrum (400.1 MHz) of (1R)-(+)-camphor obtained from catalytic *Oppenauer*-type oxidation of (1R)-(+)-borneol in CDCl<sub>3</sub> at 25 °C.

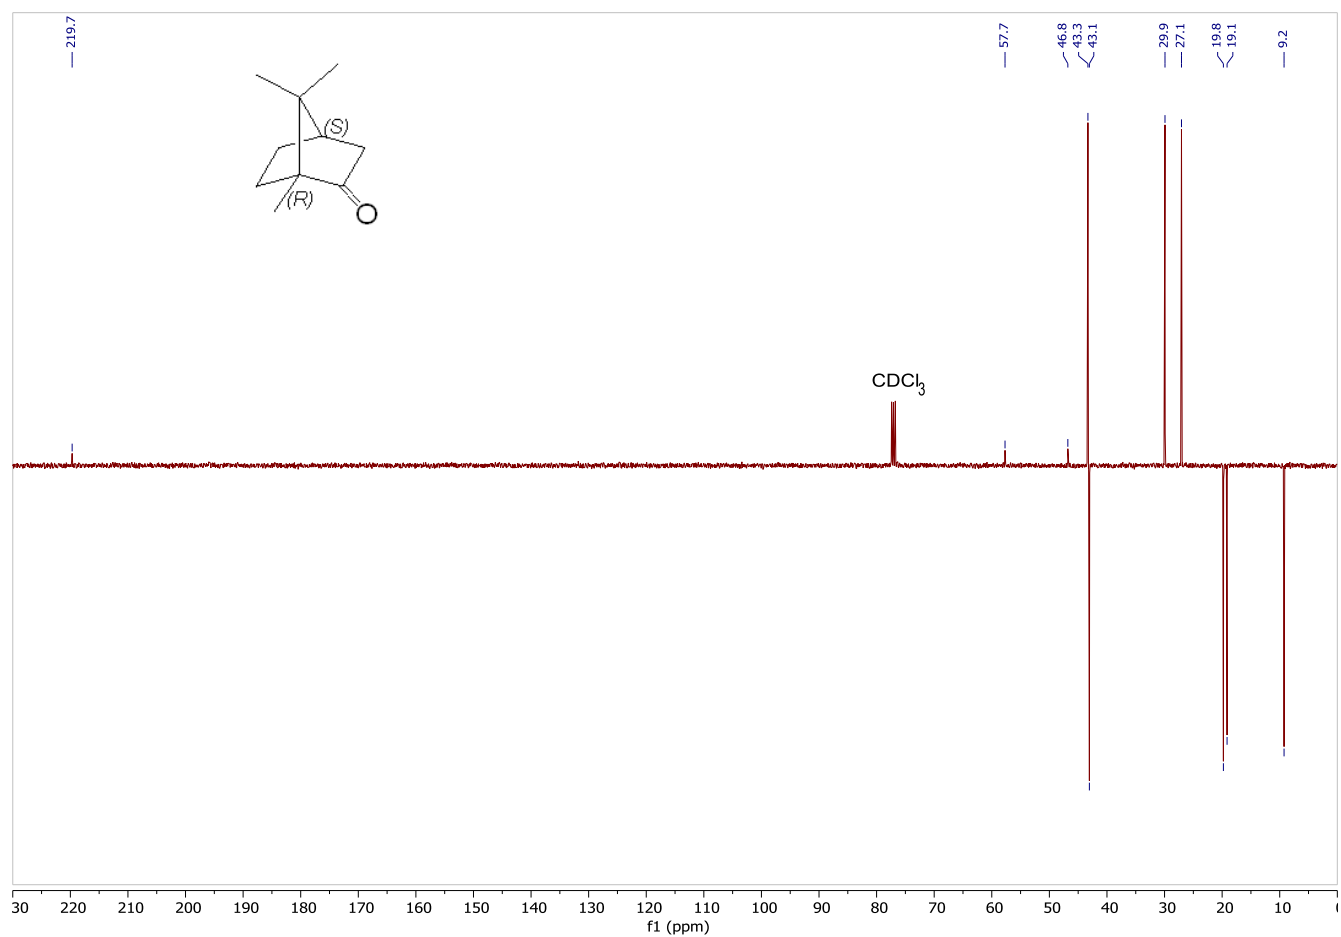

**Figure S55.**  $^{13}\text{C}\{^1\text{H}\}$  DEPTQ NMR spectrum (100.6 MHz) of (1*R*)-(+)-camphor obtained from catalytic *Oppenauer*-type oxidation of (1*R*)-(+)-borneol in  $\text{CDCl}_3$  at 25 °C.



## General Procedure for the catalytic transfer hydrogenation (TH) of carbonyl compounds

The ruthenium catalyst solutions used for the catalytic TH were prepared by dissolving the complexes (**1-4**, 2  $\mu\text{mol}$ ) in 2-propanol (2 mL). The catalyst solution (1.0 mL, 1.0  $\mu\text{mol}$ ) and a 0.1 M solution of NaOiPr (200  $\mu\text{L}$ , 20  $\mu\text{mol}$ ) in 2-propanol were added subsequently to the carbonyl substrate (1.0 mmol) dissolved in 2-propanol (final volume 10 mL), and the mixture was heated at reflux. The reaction was sampled by removing an aliquot of the reaction mixture, which was quenched by addition of diethyl ether (1:1 v/v), filtered over a short silica pad and submitted to GC analysis. The base addition was considered as the start time of the reaction. The S/C molar ratio was 1000/1, whereas the base concentration was 2 mol% respect to the carbonyl substrates (0.1 M). The same procedure was followed for the TH reactions with different S/C (1000-10000), using the appropriate amount of catalyst.

For the isolation of alcohols with **4**, the final mixture was filtered over a short silica pad and evaporated under reduced pressure. The crude residue was dissolved with diethyl ether (5 mL) and the organic layer washed with a diluted solution of HCl (0.1 M; 3 x 5 mL), dried over anhydrous  $\text{Na}_2\text{SO}_4$ , and the solvent gently evaporated, affording the alcohol products (yields: 72-94%). In some cases, it was necessary to use a purification by flash silica gel column chromatography, using petroleum ether 40-60 °C/ethyl acetate or chloroform/methanol as eluents, to obtain the final products. All compounds were characterized by  $^1\text{H}$  and  $^{13}\text{C}\{^1\text{H}\}$  NMR.

### 1-Phenylethanol:<sup>6</sup>

Colorless liquid; Yield, 94%.

$^1\text{H}$  NMR (400.1 MHz,  $\text{CDCl}_3$ , 25 °C):  $\delta$  = 7.34-7.19 (m, 5H; aromatic protons), 4.78 (q,  $^3J_{\text{HH}} = 6.5$  Hz, 1H;  $\text{CHCH}_3$ ), 2.79 (s, 1H; OH), 1.41 ppm (d,  $^3J_{\text{HH}} = 6.5$  Hz, 3H;  $\text{CHCH}_3$ );

$^{13}\text{C}\{^1\text{H}\}$  NMR (100.6 MHz,  $\text{CDCl}_3$ , 25 °C):  $\delta$  = 146.0 (s; aromatic ipso carbon), 128.5 (s; aromatic carbon atom), 127.4 (s; aromatic carbon atom), 125.5 (s; aromatic carbon atom), 70.3 (s;  $\text{CHCH}_3$ ), 25.2 ppm (s;  $\text{CHCH}_3$ ).

### 1-(*o*-tolyl)ethanol:<sup>6b, c</sup>

Colorless oil; Yield, 91%.

$^1\text{H}$  NMR (400.1 MHz,  $\text{CDCl}_3$ , 25 °C):  $\delta$  = 7.46 (dd,  $^3J_{\text{HH}} = 7.7$  Hz,  $^4J_{\text{HH}} = 1.0$  Hz, 1H; aromatic proton), 7.28-7.04 (m, 3H; aromatic protons), 5.02 (q,  $^3J_{\text{HH}} = 6.4$ , 1H;  $\text{CHCH}_3$ ), 2.87 (s, 1H; OH), 2.29 (s, 3H;  $\text{CH}_3$ ), 1.40 ppm (d,  $^3J_{\text{HH}} = 6.4$  Hz, 3H;  $\text{CHCH}_3$ );

$^{13}\text{C}\{^1\text{H}\}$  NMR (100.6 MHz,  $\text{CDCl}_3$ , 25 °C):  $\delta$  = 144.0 (s; aromatic ipso carbon), 134.2 (s; aromatic ipso carbon), 130.4 (s; aromatic carbon atom), 127.1 (s; aromatic carbon atom), 126.4 (s; aromatic carbon atom), 124.7 (s; aromatic carbon atom), 66.7 (s;  $\text{CHCH}_3$ ), 24.0 (s;  $\text{CHCH}_3$ ), 19.0 ppm (s;  $\text{CH}_3$ ).

**1-(*p*-tolyl)ethan-1-ol:**<sup>6c, 7</sup>

Colorless oil; Yield, 89%.

$^1\text{H}$  NMR (400.1 MHz,  $\text{CDCl}_3$ , 25 °C):  $\delta$  = 7.21 (d,  $^3J_{\text{HH}} = 8.1$  Hz, 2H; aromatic protons), 7.12 (d,  $^3J_{\text{HH}} = 8.1$  Hz, 2H; aromatic protons), 4.76 (q,  $^3J_{\text{HH}} = 6.5$ , 1H;  $\text{CHCH}_3$ ), 2.96 (s, 1H; OH), 2.33 (s, 3H;  $\text{CH}_3$ ), 1.42 ppm (d,  $^3J_{\text{HH}} = 6.5$  Hz, 3H;  $\text{CHCH}_3$ );

$^{13}\text{C}\{^1\text{H}\}$  NMR (100.6 MHz,  $\text{CDCl}_3$ , 25 °C):  $\delta$  = 143.1 (s; aromatic ipso carbon), 136.9 (s; aromatic ipso carbon), 129.1 (s; aromatic carbon atoms), 125.5 (s; aromatic carbon atoms), 70.0 (s;  $\text{CHCH}_3$ ), 25.2 (s;  $\text{CHCH}_3$ ), 21.1 ppm (s;  $\text{CH}_3$ ).

**1-(2'-Methoxyphenyl)ethanol:**<sup>6a, 8</sup>

Colorless oil; Yield, 92%.

$^1\text{H}$  NMR (400.1 MHz,  $\text{CDCl}_3$ , 25 °C):  $\delta$  = 7.31 (dd,  $^3J_{\text{HH}} = 7.5$  Hz,  $^4J_{\text{HH}} = 1.7$  Hz, 1H; aromatic proton), 7.18 (td,  $^3J_{\text{HH}} = 8.0$  Hz,  $^4J_{\text{HH}} = 1.7$  Hz, 1H; aromatic proton), 6.90 (td,  $^3J_{\text{HH}} = 7.5$  Hz,  $^4J_{\text{HH}} = 0.9$  Hz, 1H; aromatic proton), 6.80 (d,  $^3J_{\text{HH}} = 8.0$  Hz, 1H; aromatic proton), 5.05 (q,  $^3J_{\text{HH}} = 6.5$  Hz, 1H;  $\text{CHCH}_3$ ), 3.76 (s, 3H;  $\text{OCH}_3$ ), 3.11 (s, 1H; OH), 1.42 ppm (d,  $^3J_{\text{HH}} = 6.5$  Hz, 3H;  $\text{CHCH}_3$ );

$^{13}\text{C}\{^1\text{H}\}$  NMR (100.6 MHz,  $\text{CDCl}_3$ , 25 °C):  $\delta$  = 156.4 (s; aromatic ipso carbon), 133.8 (s; aromatic ipso carbon), 128.2 (s; aromatic carbon atom), 126.0 (s; aromatic carbon atom), 120.8 (s; aromatic carbon atom), 110.4 (s; aromatic carbon atom), 66.0 (s;  $\text{CHCH}_3$ ), 55.2 (s;  $\text{OCH}_3$ ), 23.1 ppm (s;  $\text{CHCH}_3$ )

**Benzhydrol (Diphenylmethanol):**<sup>6c</sup>

White crystals; m.p. 68 °C (69 °C, lit.); Yield, 90%.

$^1\text{H}$  NMR (400.1 MHz,  $\text{CDCl}_3$ , 25 °C):  $\delta$  = 7.44-7.34 (m, 8H; aromatic protons), 7.32-7.27 (m, 2H; aromatic protons), 5.87 (d,  $^3J_{\text{HH}} = 3.5$  Hz, 1H;  $\text{CHOH}$ ), 2.28 ppm (d,  $^3J_{\text{HH}} = 3.5$  Hz, 1H; OH);

$^{13}\text{C}\{^1\text{H}\}$  NMR (100.6 MHz,  $\text{CDCl}_3$ , 25 °C):  $\delta$  = 143.8 (s; aromatic ipso carbons), 128.5 (s; aromatic carbon atoms), 127.6 (s; aromatic carbon atoms), 126.6 (s; aromatic carbon atoms), 76.3 ppm (s;  $\text{CHOH}$ ).

**Cyclohexanol:**<sup>7</sup>

Colorless oil; Yield, 95%.

<sup>1</sup>H NMR (400.1 MHz, CDCl<sub>3</sub>, 25 °C):  $\delta$  = 3.57 (tt, <sup>3</sup>J<sub>HH</sub> = 8.8 Hz, <sup>3</sup>J<sub>HH</sub> = 4.2 Hz, 1H; CHOH), 2.00 (s, 1H; OH), 1.90-1.82 (m, 2H; CH<sub>2</sub>CHOH), 1.75-1.65 (m, 2H; CH<sub>2</sub>), 1.56-1.47 (m, 1H; CH<sub>2</sub>), 1.31-1.07 ppm (m, 5H; CH<sub>2</sub>);

<sup>13</sup>C{<sup>1</sup>H} NMR (100.6 MHz, CDCl<sub>3</sub>, 25 °C):  $\delta$  = 70.3 (s; CHOH), 35.5 (s; CH<sub>2</sub>CHOH), 25.5 (s; CH<sub>2</sub>), 24.1 ppm (s; CH<sub>2</sub>).

**Benzyl alcohol:**<sup>7,9</sup>

Colorless liquid; Yield, 72%.

<sup>1</sup>H NMR (400.1 MHz, CDCl<sub>3</sub>, 25 °C):  $\delta$  = 7.35-7.22 (m, 5H; aromatic protons), 4.55 (br s, 2H; CH<sub>2</sub>OH), 2.98 ppm (br s, 1H; OH);

<sup>13</sup>C{<sup>1</sup>H} NMR (100.6 MHz, CDCl<sub>3</sub>, 25 °C):  $\delta$  = 141.0 (s; aromatic ipso carbon), 128.6 (s; aromatic carbon atoms), 127.6 (s; aromatic carbon atoms), 127.1 (s; aromatic carbon atoms), 65.0 ppm (s; CH<sub>2</sub>OH).

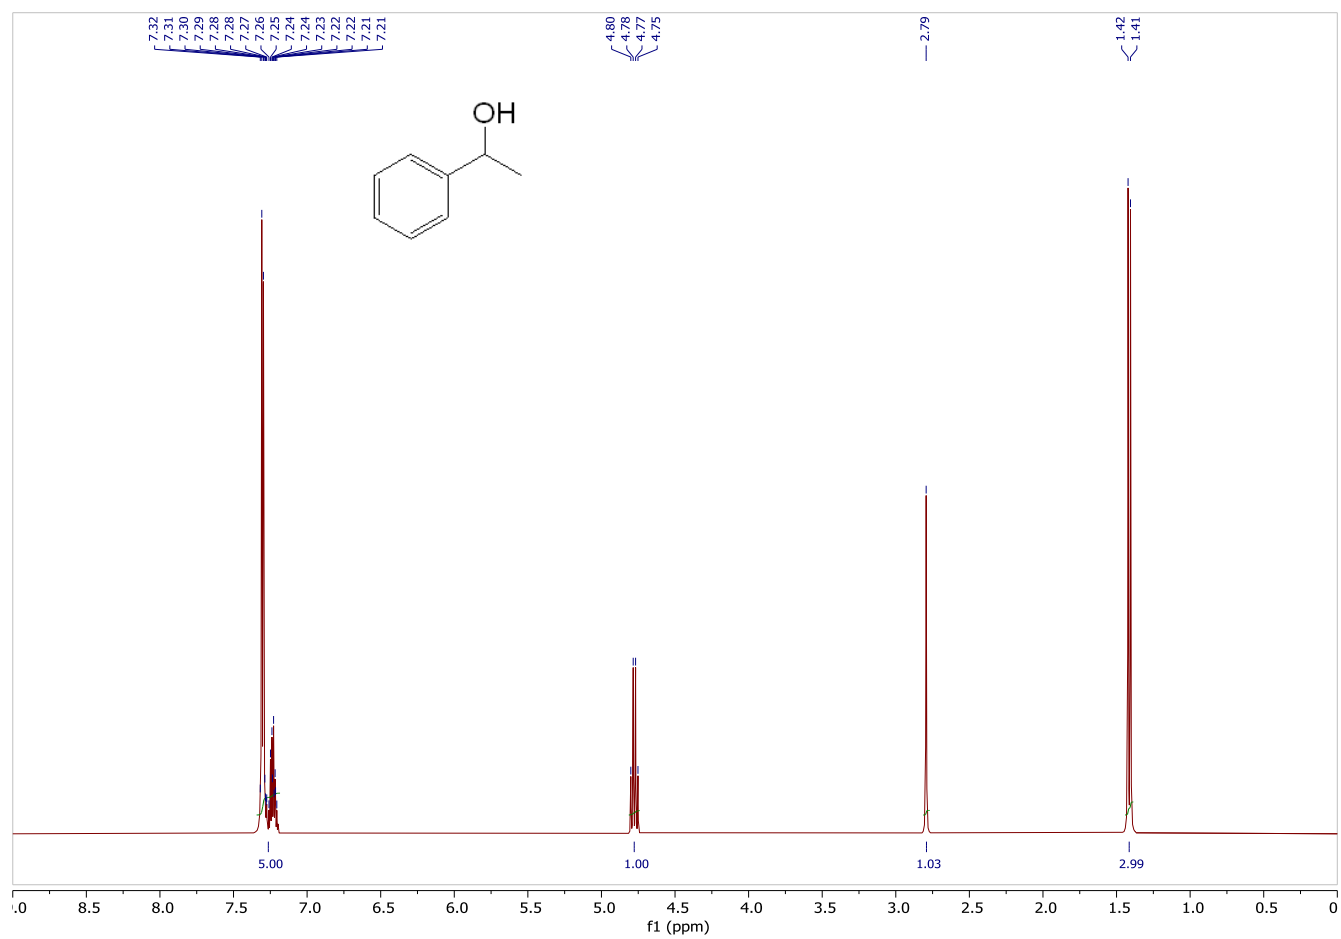

**Figure S56.**  $^1\text{H}$  NMR spectrum (400.1 MHz) of 1-Phenylethanol obtained from catalytic TH of acetophenone in  $\text{CDCl}_3$  at 25  $^\circ\text{C}$ .

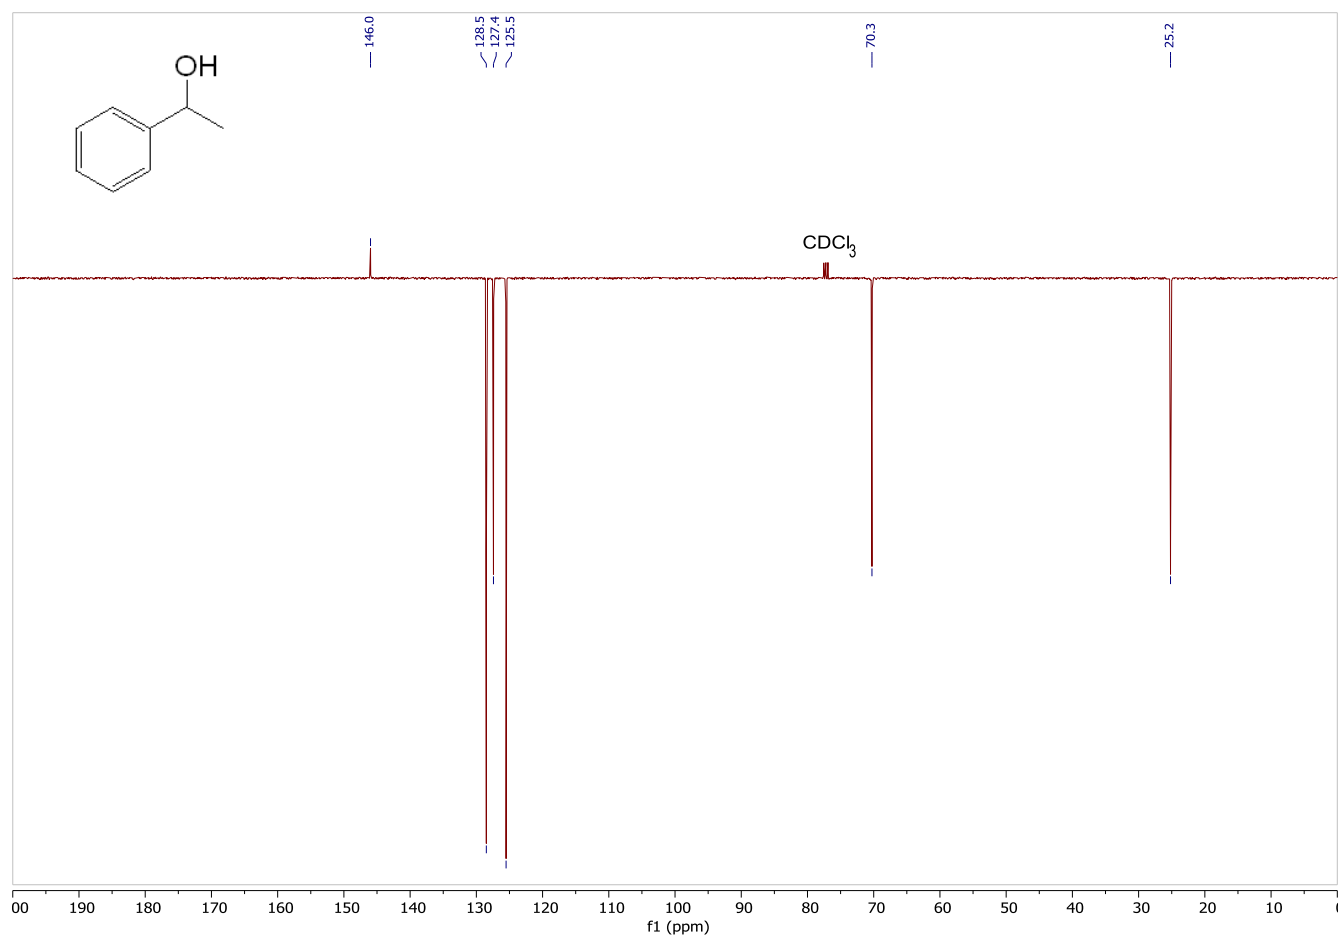

**Figure S57.**  $^{13}\text{C}\{^1\text{H}\}$  NMR spectrum (100.6 MHz) of 1-Phenylethanol obtained from catalytic TH of acetophenone in  $\text{CDCl}_3$  at 25 °C.

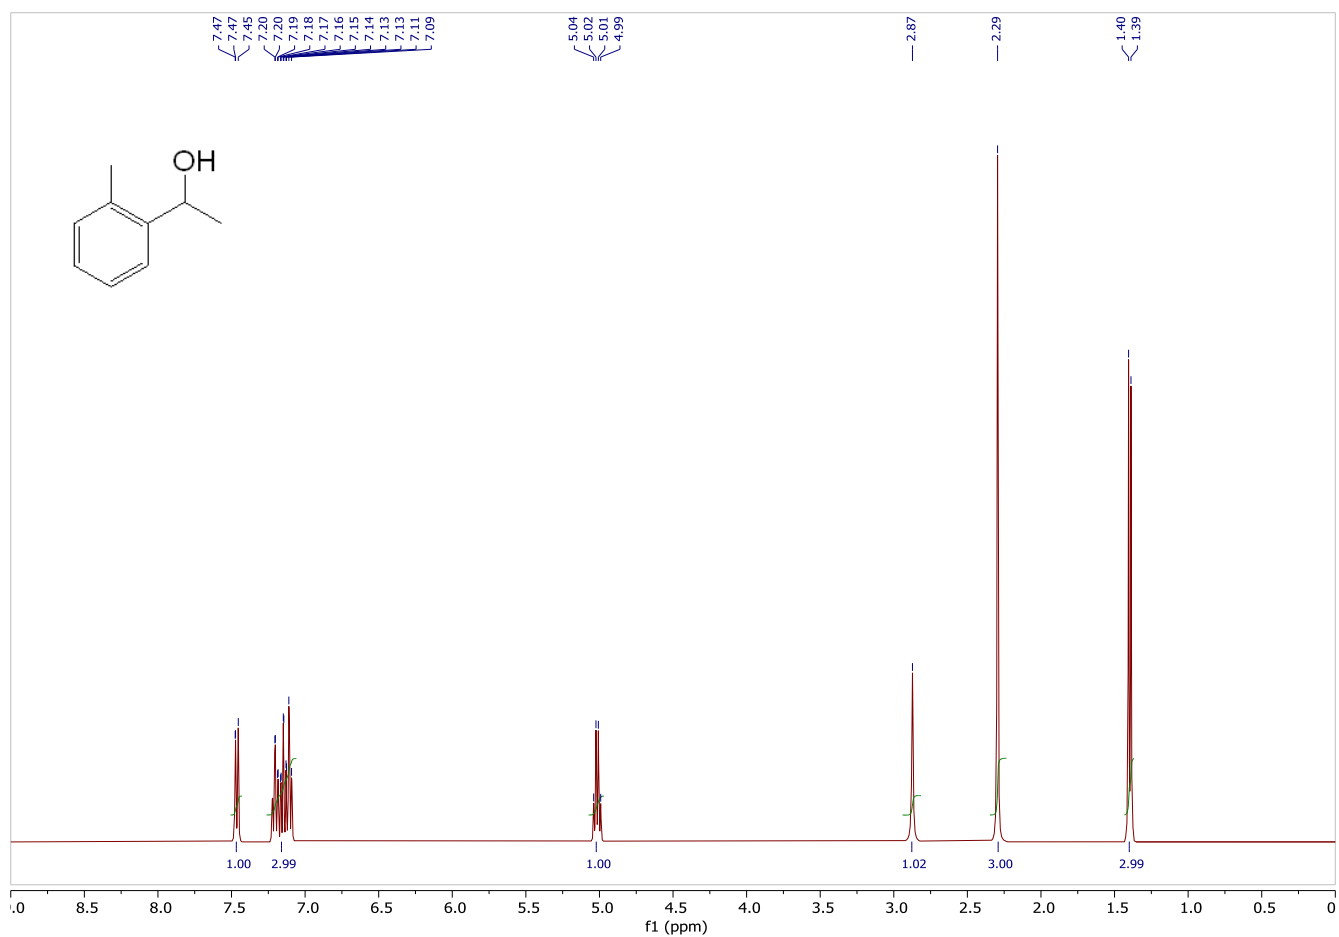

**Figure S58.** <sup>1</sup>H NMR spectrum (400.1 MHz) of 1-(*o*-tolyl)ethanol obtained from catalytic TH of 2'-methylacetophenone in CDCl<sub>3</sub> at 25 °C.

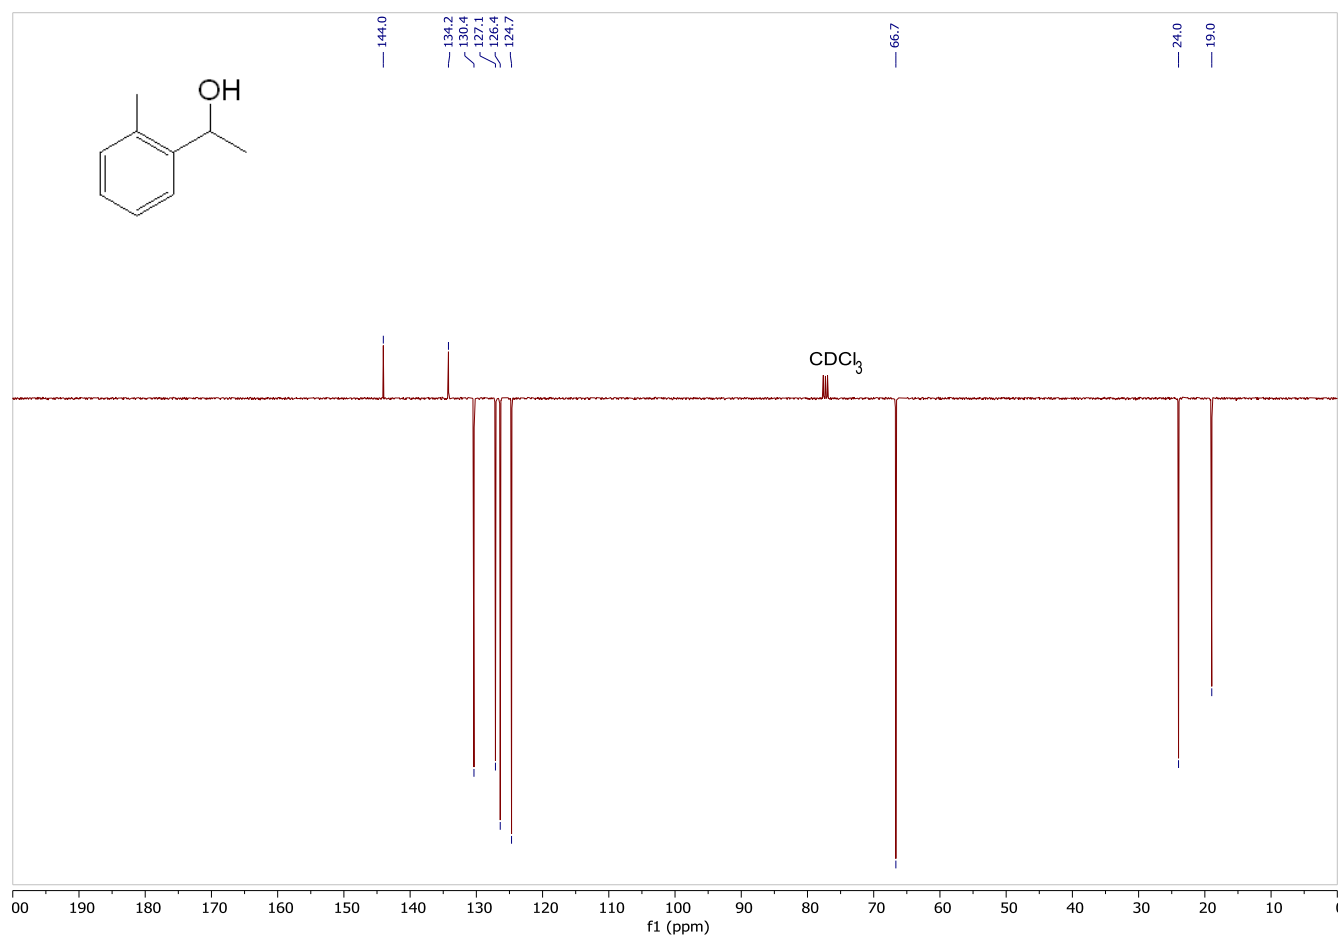

**Figure S59.**  $^{13}\text{C}\{^1\text{H}\}$  NMR spectrum (100.6 MHz) of 1-(*o*-tolyl)ethanol obtained from catalytic TH of 2'-methylacetophenone in  $\text{CDCl}_3$  at 25 °C.

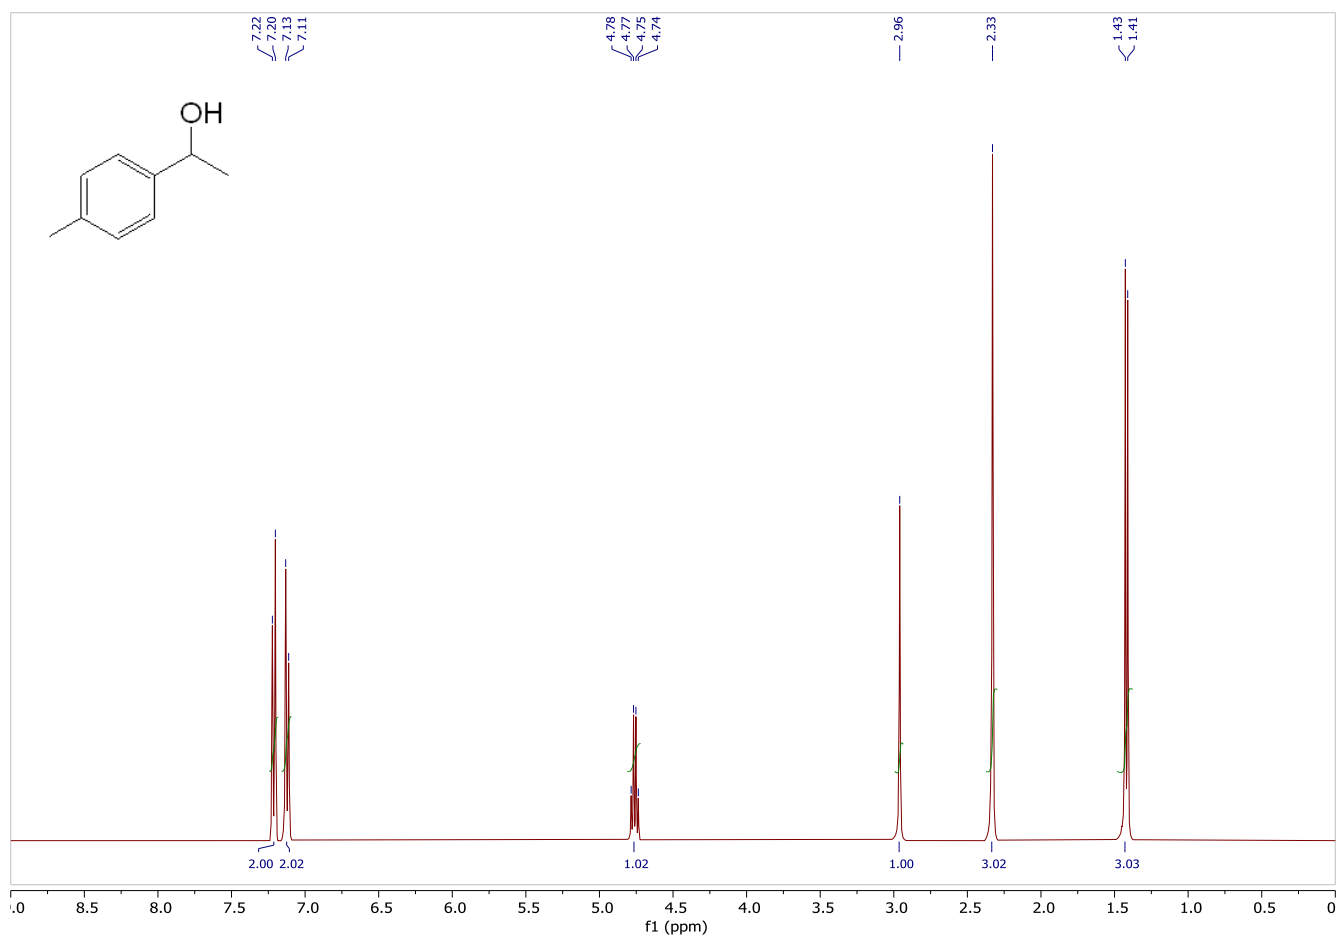

**Figure S60.** <sup>1</sup>H NMR spectrum (400.1 MHz) of 1-(*p*-tolyl)ethanol obtained from catalytic TH of 4'-methylacetophenone in CDCl<sub>3</sub> at 25 °C.



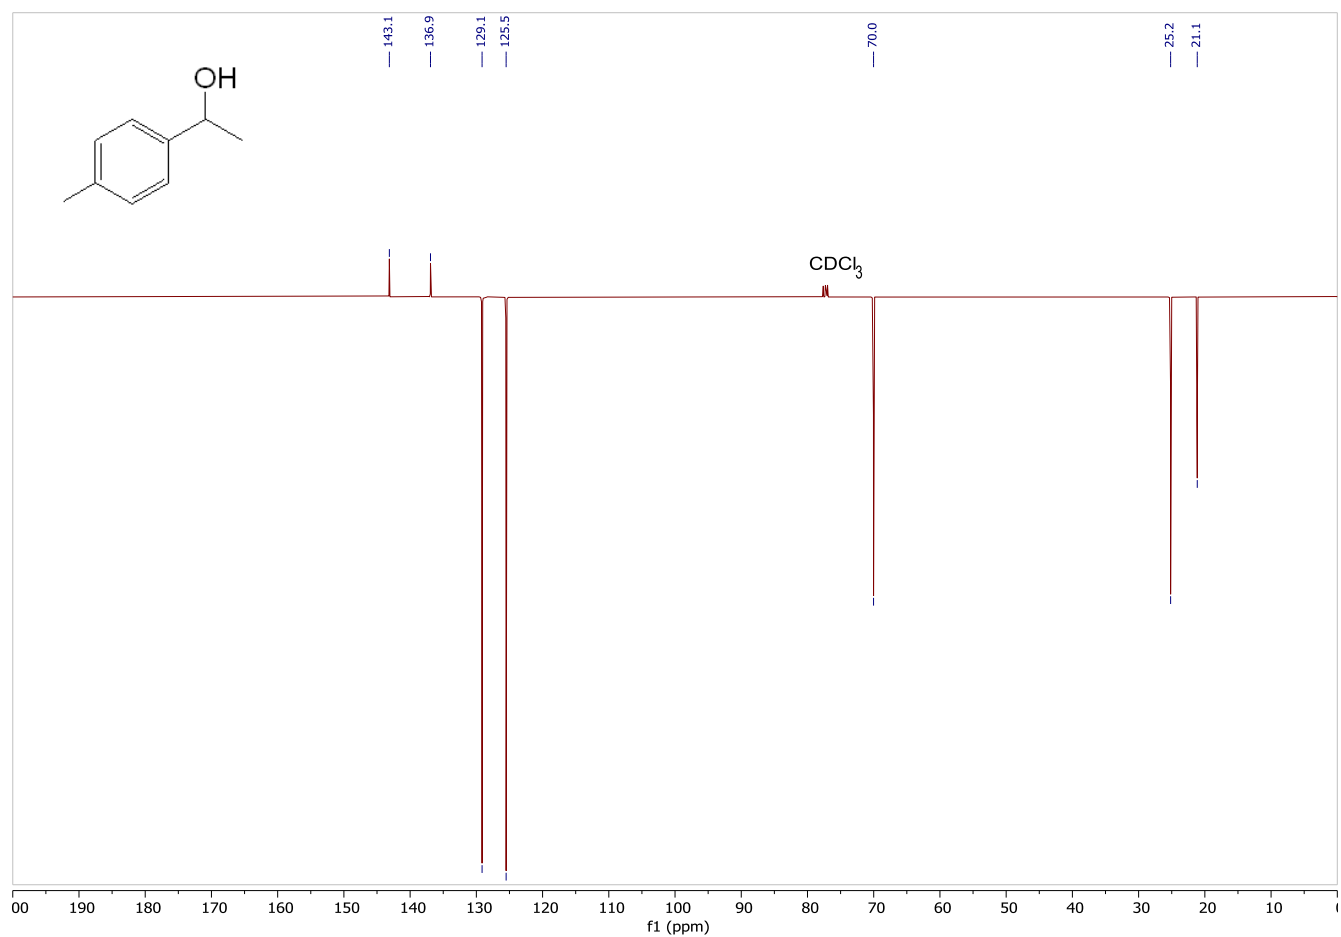

**Figure S61.**  $^{13}\text{C}\{^1\text{H}\}$ NMR spectrum (100.6 MHz) of 1-(*p*-tolyl)ethanol obtained from catalytic TH of 4'-methylacetophenone in  $\text{CDCl}_3$  at 25 °C.

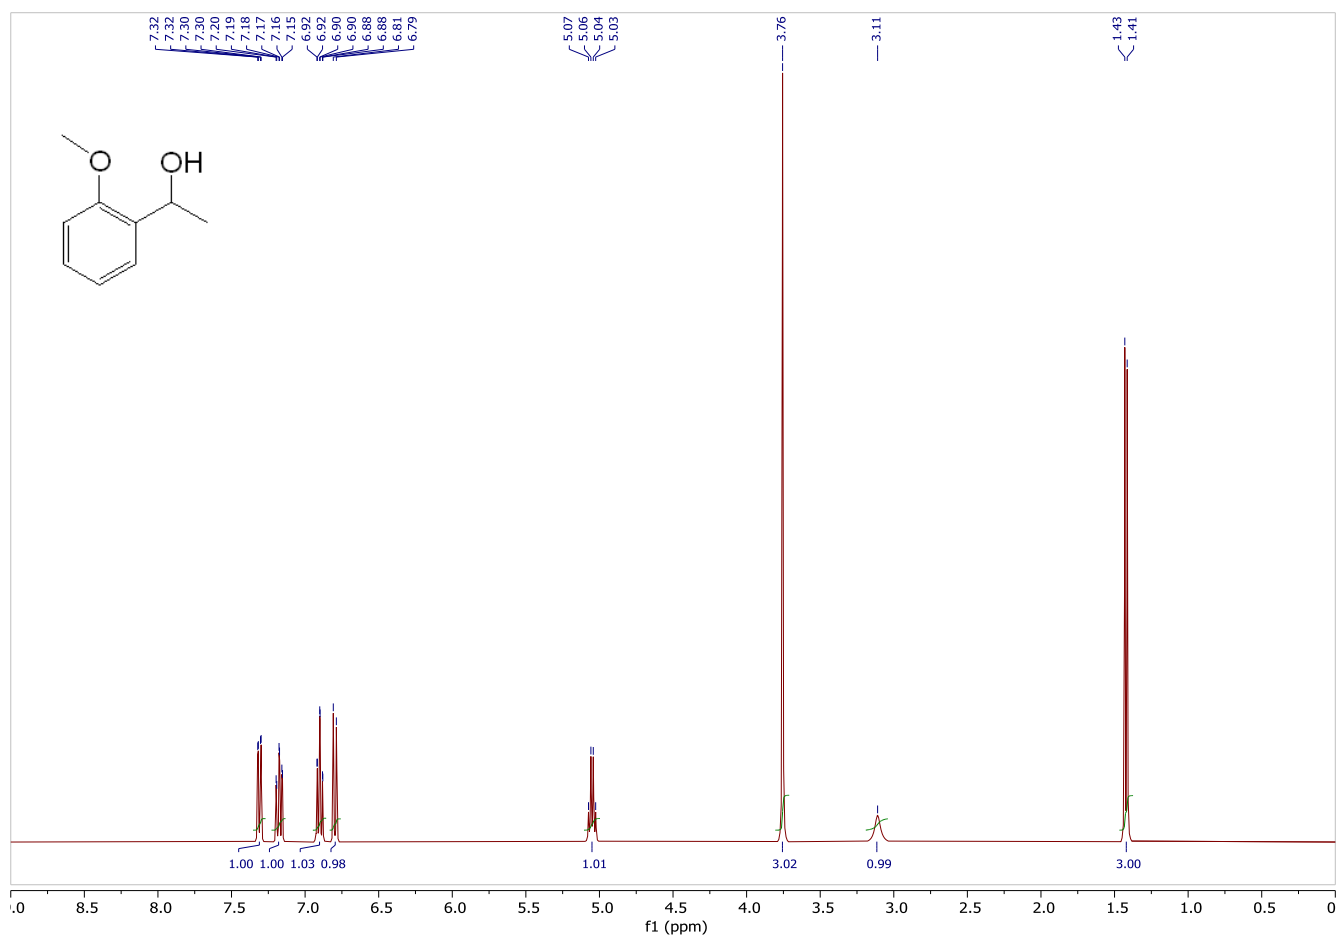

**Figure S62.** <sup>1</sup>H NMR spectrum (400.1 MHz) of 1-(2'-methoxy-phenyl)ethanol obtained from catalytic TH of 2'-methoxyacetophenone in CDCl<sub>3</sub> at 25 °C.

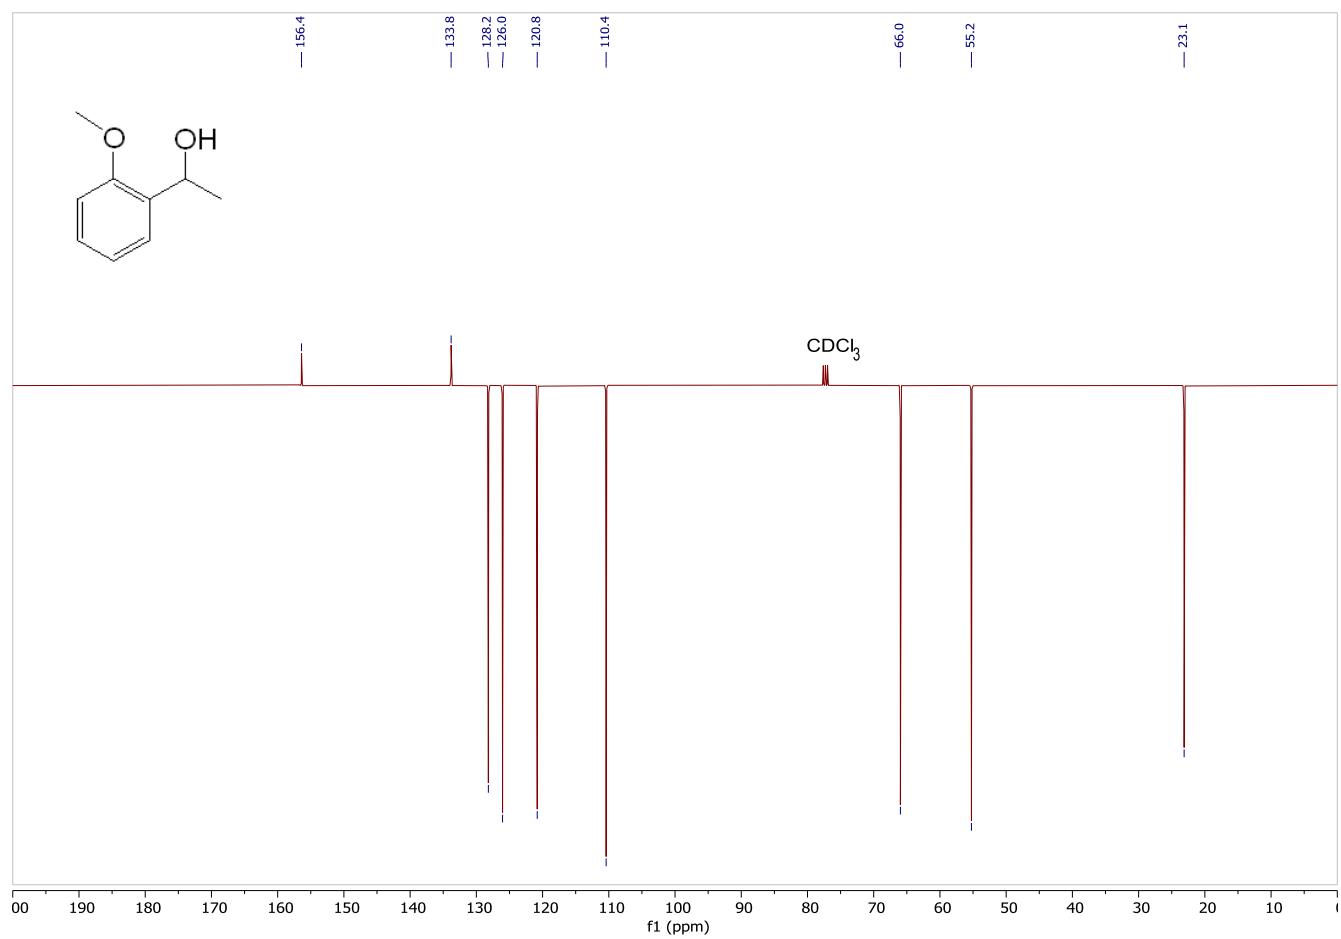

**Figure S63.**  $^{13}\text{C}\{^1\text{H}\}$ NMR spectrum (100.6 MHz) of 1-(2'-methoxy-phenyl)ethanol obtained from catalytic TH of 2'-methoxyacetophenone in  $\text{CDCl}_3$  at 25 °C.

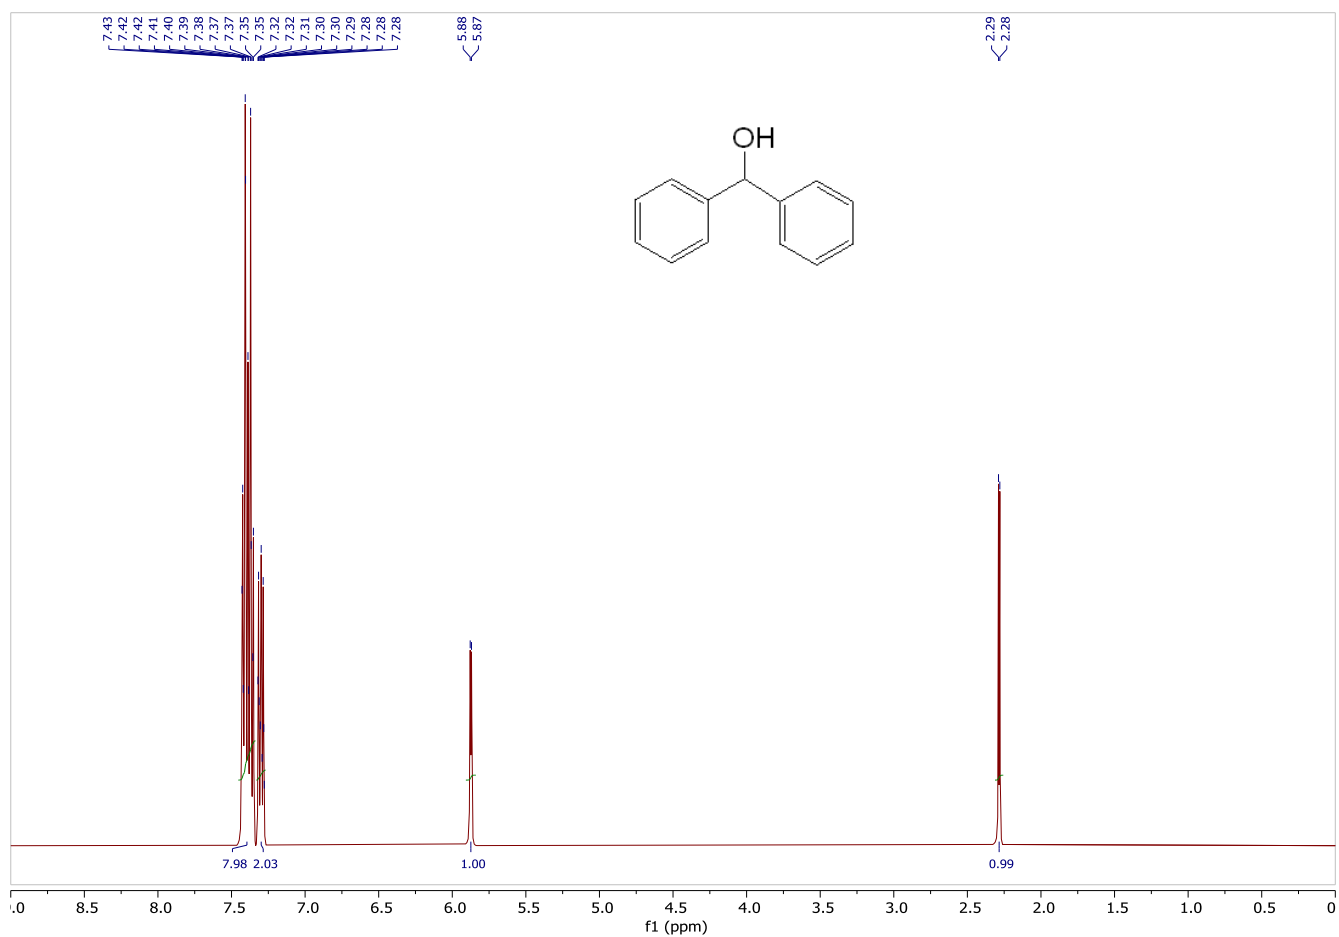

**Figure S64.**  $^1\text{H}$  NMR spectrum (400.1 MHz) of benzhydrol obtained from catalytic TH of benzophenone in  $\text{CDCl}_3$  at  $25\text{ }^\circ\text{C}$ .

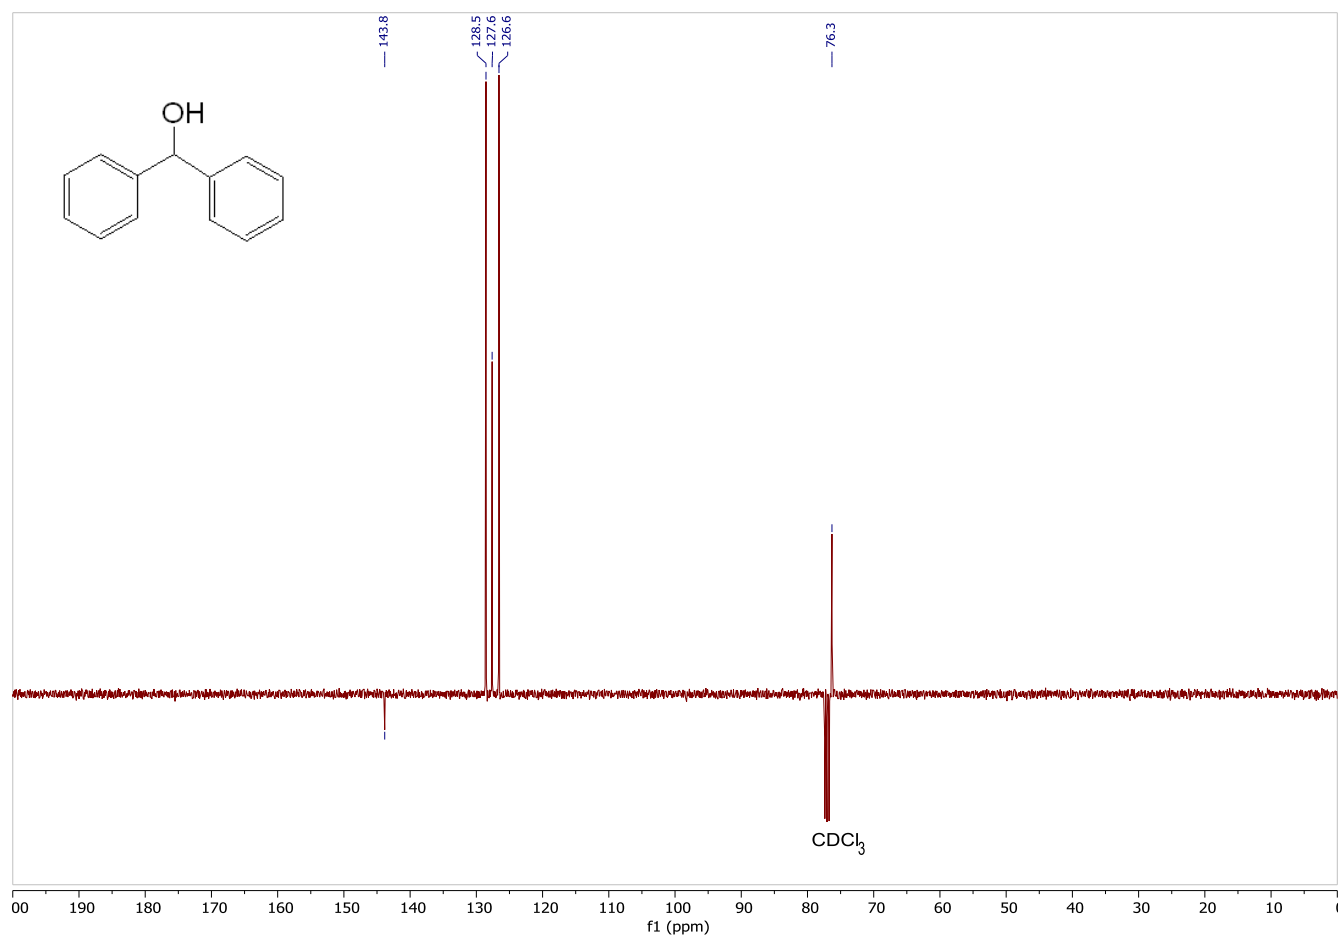

**Figure S65.**  $^{13}\text{C}\{^1\text{H}\}$ NMR spectrum (100.6 MHz) of benzhydrol obtained from catalytic TH of benzophenone in  $\text{CDCl}_3$  at 25 °C.

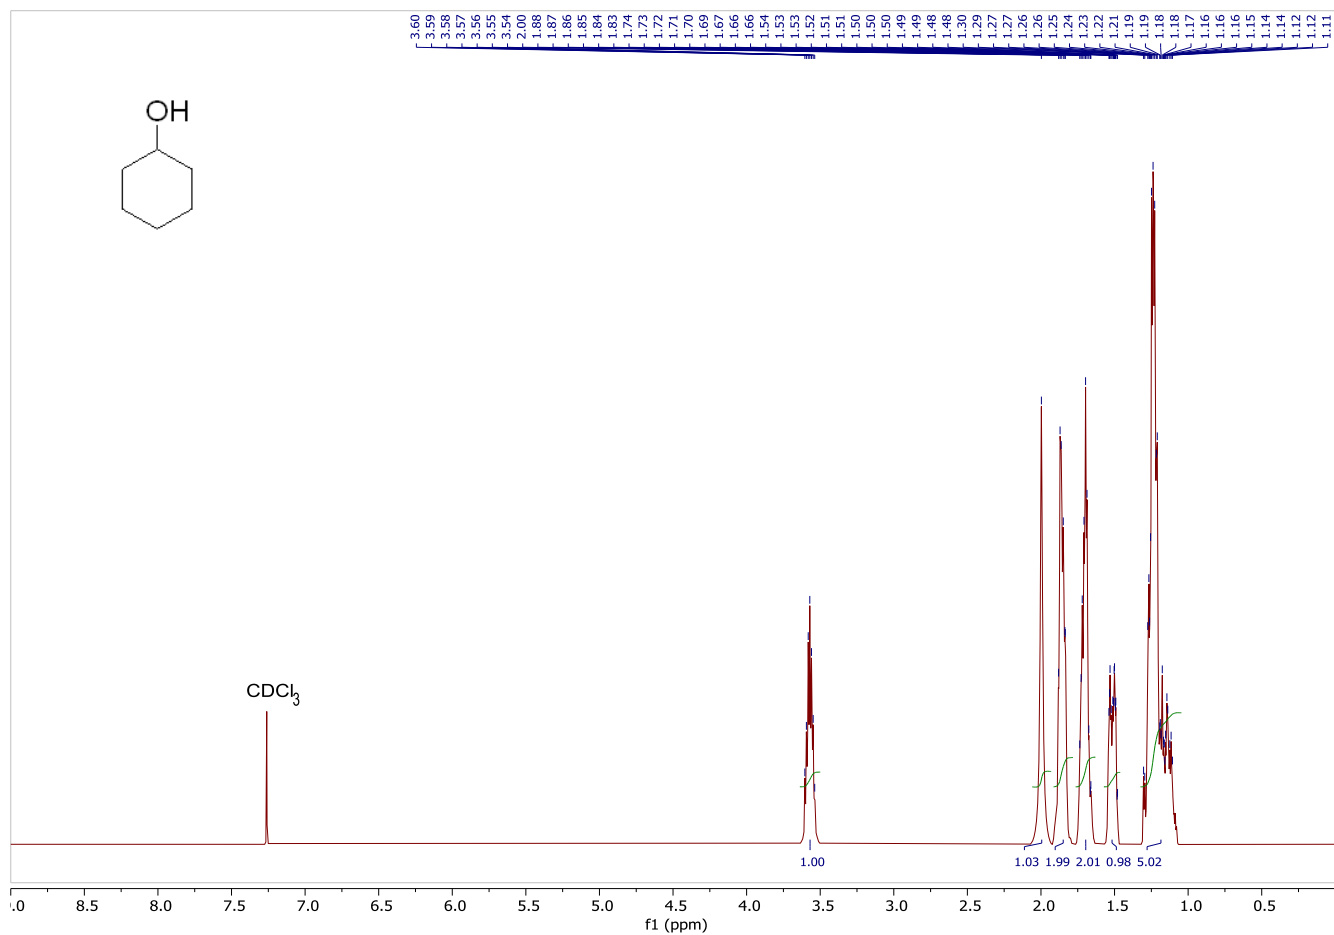

**Figure S66.**  $^1\text{H}$  NMR spectrum (400.1 MHz) of cyclohexanol obtained from catalytic TH of cyclohexanone in  $\text{CDCl}_3$  at 25  $^\circ\text{C}$ .

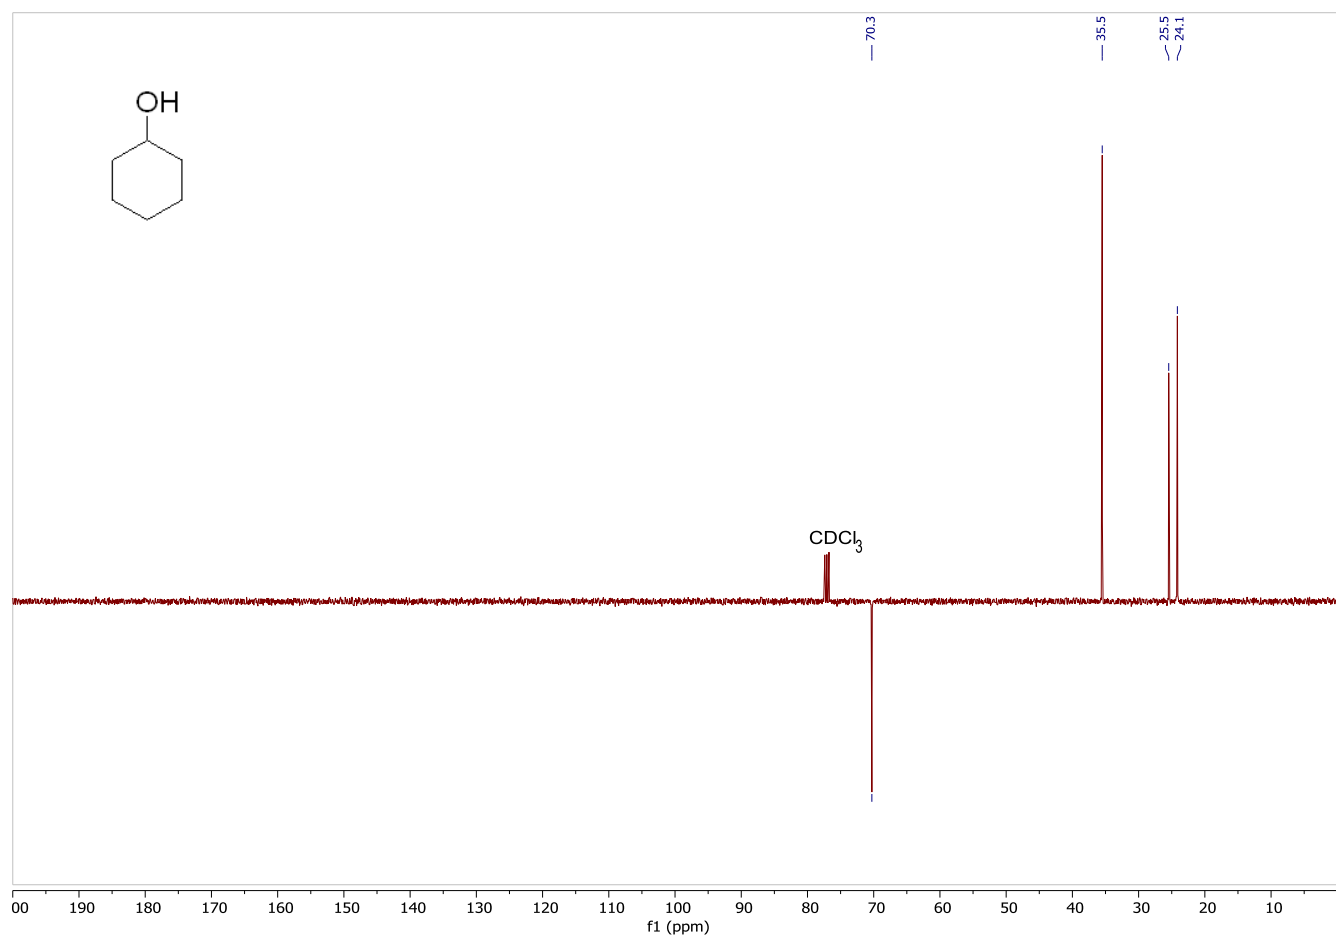

**Figure S67.**  $^{13}\text{C}\{^1\text{H}\}$ NMR spectrum (100.6 MHz) of cyclohexanol obtained from catalytic TH of cyclohexanone in  $\text{CDCl}_3$  at 25 °C.

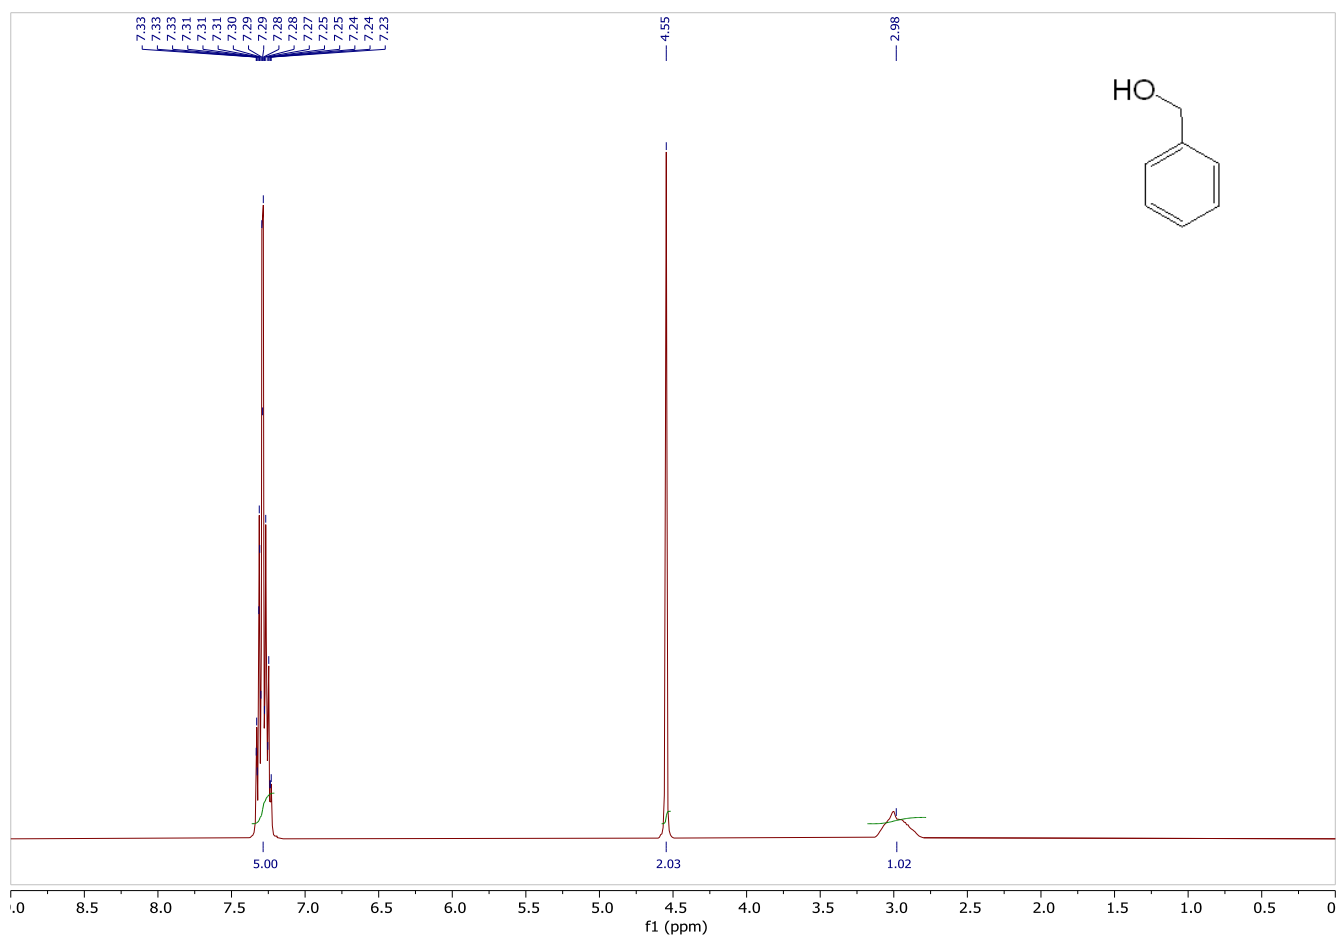

**Figure S68.**  $^1\text{H}$  NMR spectrum (400.1 MHz) of benzyl alcohol obtained from catalytic TH of benzaldehyde in  $\text{CDCl}_3$  at 25 °C.



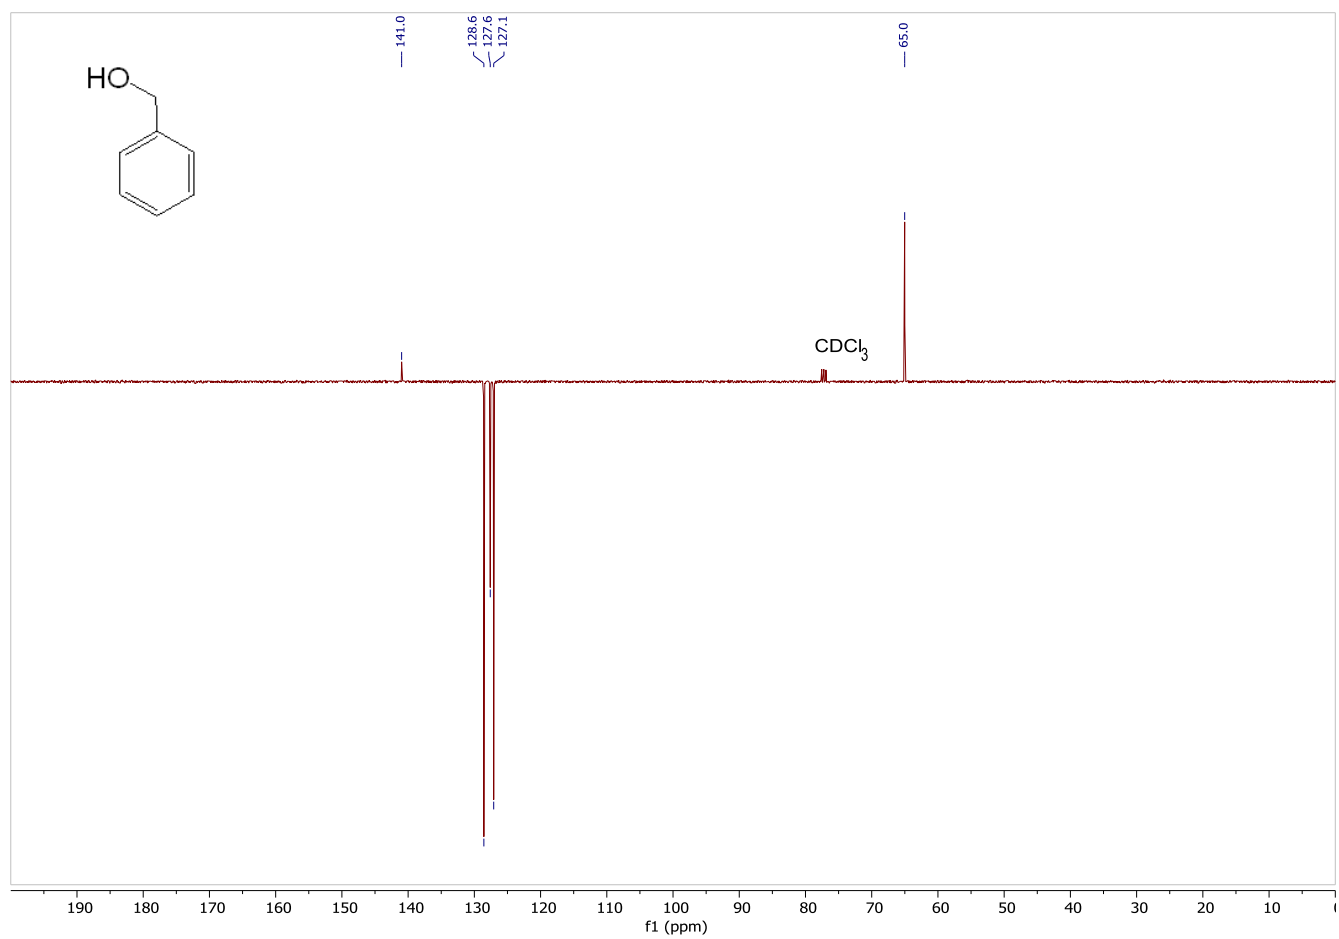

**Figure S69.**  $^{13}\text{C}\{^1\text{H}\}$  NMR spectrum (100.6 MHz) of benzyl alcohol obtained from catalytic TH of benzaldehyde in  $\text{CDCl}_3$  at 25 °C.

## Single Crystal X-Ray Structure Determination of Compounds 1-4 (CCDC 2253558-2253561)

### General Data

X-ray diffraction data were collected at 100 K on an X-ray single crystal diffractometer equipped with a CPAD detector (Bruker Photon-II CPAD), an IMS microsource with MoK $\alpha$  radiation ( $\lambda = 0.71073 \text{ \AA}$ ) and a Helios optic using the APEX4 software package.<sup>10</sup> Measurements were performed on a single crystal coated with perfluorinated ether and the crystal was fixed on top of a Kapton micro sampler, transferred to the diffractometer and frozen under a stream of cold nitrogen. A matrix scan was used to determine the initial lattice parameters. Reflections were merged and corrected for Lorentz and polarization effects, scan speed and background using SAINT.<sup>11</sup> Absorption corrections, including odd and even ordered spherical harmonics were performed using SADABS.<sup>11</sup> Based on systematic absences, E-statistics and successful refinement of the structures, the space group was assigned. The structures were solved by direct methods with the aid of successive difference Fourier maps, and were refined against all data using APEX4 software with SHELXL in conjunction with SHELXLE.<sup>12-14</sup> Full-matrix least-squares refinements were carried out by minimizing  $\sum w(F_o^2 - F_c^2)^2$  with the SHELXL weighting scheme.<sup>12</sup> All non-hydrogen atoms were refined using anisotropic displacement parameters and hydrogen atoms were calculated in ideal positions with  $U_{\text{iso}}(\text{H}) = 1.2 U_{\text{eq}}(\text{C})$ . Neutral atom scattering factors for all atoms and anomalous dispersion corrections for the non-hydrogen atoms were taken from *International Tables for Crystallography*.<sup>15</sup> Structural illustrations were generated with Mercury and Platon.21 for Windows.<sup>16, 17</sup> CCDC 2253558-2253561 contain the supplementary crystallographic data for this paper. These data are provided free of charge by The Cambridge Crystallographic Data Centre.

Single Crystal X-Ray Structure Determination of Compound 1 (CCDC 2253559).

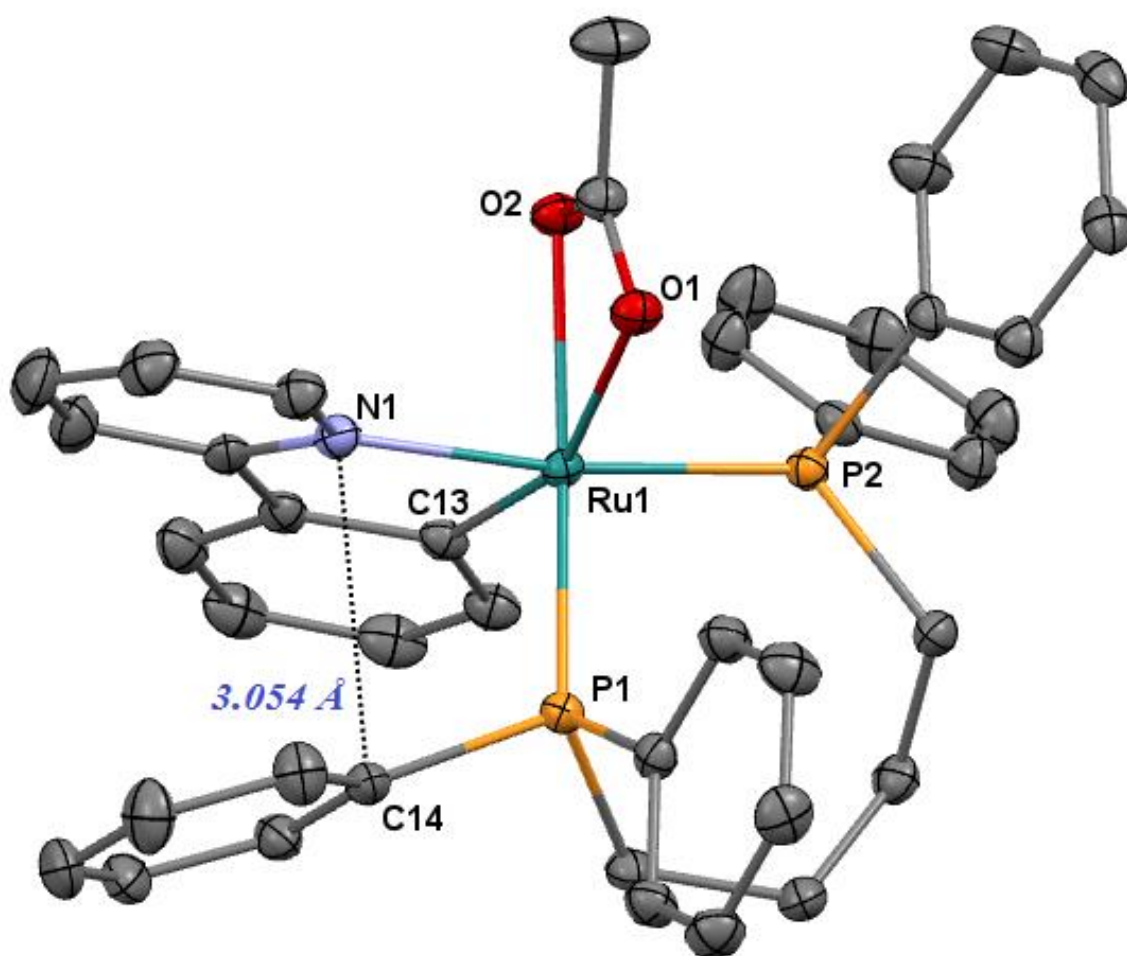

**Figure S70.** ORTEP style plot of compound **1** in the solid state (CCDC 2253559). Ellipsoids are drawn at the 50% probability level. Hydrogen atoms are omitted for clarity. Selected bond lengths [Å] and angles [°]: Ru1–N1 2.1030(16), Ru1–C13 2.0342(18), Ru1–O2 2.2242(13), Ru1–P1 2.2292(5), Ru1–O1 2.2582(13), Ru1–P2 2.2814(5), C13–Ru1–N1 79.89(7), C13–Ru1–O2 102.61(6), N1–Ru1–O2 83.18(5), C13–Ru1–P1 86.15(5), N1–Ru1–P1 91.65(4), O2–Ru1–P1 168.81(4), C13–Ru1–O1 158.30(6), N1–Ru1–O1 86.67(6), O2–Ru1–O1 58.57(5), P1–Ru1–O1 111.37(4), C13–Ru1–P2 101.34(5), N1–Ru1–P2 172.56(4), O2–Ru1–P2 89.40(4), P1–Ru1–P2 95.747(18), O1–Ru1–P2 89.90(4).

## Single Crystal X-Ray Structure Determination of Compound 1 (CCDC 2253559).

### Detailed Crystallographic Data.

|                              |                                  |
|------------------------------|----------------------------------|
| Diffractometer operator:     | A. A. Heidecker                  |
| Scanspeed                    | 1-3 s per frame                  |
| dx                           | 40 mm                            |
| Frames:                      | 2109 measured in 8 XYZ data sets |
| phi-scans with delta phi     | 0.5/1.0                          |
| omega-scans with delta omega | 0.5                              |

### Crystal Data:

|                                                                                      |                                                                             |
|--------------------------------------------------------------------------------------|-----------------------------------------------------------------------------|
| Chemical formula [C <sub>41</sub> H <sub>39</sub> NO <sub>2</sub> P <sub>2</sub> Ru] | Density (calculated) = <u>1.467</u> g/cm <sup>3</sup>                       |
| Formula weight <u>740.74</u>                                                         | Absorption coefficient = <u>0.601</u> mm <sup>-1</sup>                      |
| <u>monoclinic, P 21/n</u>                                                            | <u>Mo K<math>\alpha</math></u> radiation, $\lambda = \underline{0.71073}$ Å |
| $a = \underline{9.8638(10)}$ Å $\alpha = 90^\circ$                                   | Cell parameters from <u>106782</u> reflections                              |
| $b = \underline{17.891(2)}$ Å $\beta = 90.761(4)^\circ$                              | $\theta = \underline{2.28-27.48}^\circ$                                     |
| $c = \underline{19.013(2)}$ Å $\gamma = 90^\circ$                                    | $T = \underline{100(2)}$ K                                                  |
| $V = \underline{3355.0(6)}$ Å <sup>3</sup>                                           | <u>clear orange fragment</u>                                                |
| $Z = \underline{4}$                                                                  | <u>0.050 x 0.164 x 0.222</u> mm                                             |
| $F(000) = \underline{1528}$                                                          |                                                                             |

### Data collection:

|                                                    |                                                                                                                                            |
|----------------------------------------------------|--------------------------------------------------------------------------------------------------------------------------------------------|
| <u>Bruker D8 Venture Duo IMS</u><br>diffractometer | <u>7691</u> independent reflections                                                                                                        |
| Radiation source: <u>TXS rotating anode</u>        | <u>6956</u> reflections with $I > 2\sigma(F^2)$                                                                                            |
| <u>Helios optic</u> monochromator                  | $R_{\text{int}} = \underline{0.0769}$                                                                                                      |
| Theta range for data collection                    | $\theta_{\text{max}} = \underline{27.48}^\circ$ , $\theta_{\text{min}} = \underline{2.28}^\circ$                                           |
| Index ranges                                       | $\underline{-12} \leq h \leq \underline{12}$ , $\underline{-23} \leq k \leq \underline{23}$ , $\underline{-24} \leq l \leq \underline{24}$ |
| Absorption correction                              | Multi-Scan, <u>SADABS 2016/2, Bruker</u>                                                                                                   |

Max. and min. transmission:

0.7043 and 0.6692

106782 measured reflections

Coverage of independent reflections = 99.9%

Data refinement:

Refinement method

Full-matrix least-squares on  $F^2$

Refinement program

SHELXL-2018/3 (Sheldrick, 2018)

Structure solution technique

direct methods

Structure solution program

SHELXT 2018/2 (Sheldrick, 2018)

Function minimized

$\Sigma w(F_o^2 - F_c^2)^2$

Data / restraints / parameters

7691 / 0 / 425

Final R indices

6956 data;  $I > 2\sigma(I)$  R1 = 0.0273, wR2 = 0.0676

all data R1 = 0.0320, wR2 = 0.0704

$w = 1/[\sigma^2(F_o^2) + (0.0262P)^2 + 3.6827P]$

Weighting scheme

where  $P = (F_o^2 + 2F_c^2)/3$

$\Delta/\sigma_{\max}$

0.001

Goodness-of-fit on  $F^2$

1.041

Largest diff. peak and hole

0.449 and -0.464 eÅ<sup>-3</sup>

R.M.S. deviation from mean

0.069 eÅ<sup>-3</sup>

## Single Crystal X-Ray Structure Determination of Compound 2 (CCDC 2253561).

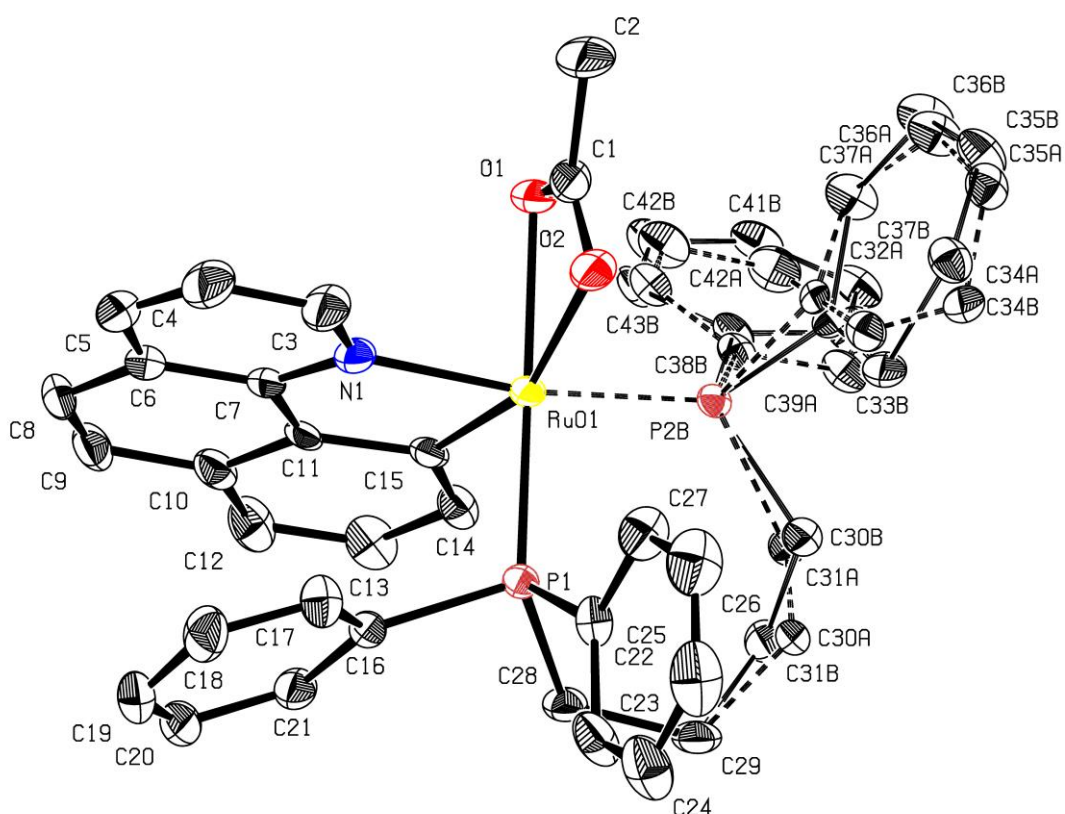

**Figure S71.** ORTEP style plot of compound **2** in the solid state (CCDC 2253561). Ellipsoids are drawn at the 50% probability level. Hydrogen atoms are omitted for clarity. Selected bond lengths [ $\text{\AA}$ ] and angles [ $^\circ$ ]: Ru1-C15 2.040(3), Ru1-N1 2.115(3), Ru1-P2A 2.201(3), Ru1-O1 2.209(2), Ru1-P1 2.2338(8), Ru1-O2 2.237(2), Ru1-P2B 2.348(3), C15-Ru1-N1 80.84(12), C15-Ru1-P2A 105.26(13), N1-Ru1-P2A 171.13(10), C15-Ru1-O1 104.13(11), N1-Ru1-O1 83.62(10), P2A-Ru1-O1 88.59(10), C15-Ru1-P1 83.76(8), N1-Ru1-P1 92.51(8), P2A-Ru1-P1 94.53(8), O1-Ru1-P1 170.46(8), C15-Ru1-O2 159.86(10), N1-Ru1-O2 85.91(10), P2A-Ru1-O2 86.46(11), O1-Ru1-O2 59.07(10), P1-Ru1-O2 112.06(8), C15-Ru1-P2B 96.00(12), N1-Ru1-P2B 169.52(11), O1-Ru1-P2B 87.51(10), P1-Ru1-P2B 97.09(7), O2-Ru1-P2B 94.32(10).

## Single Crystal X-Ray Structure Determination of Compound 2 (CCDC 2253561)

### Detailed Crystallographic Data.

|                              |                                   |
|------------------------------|-----------------------------------|
| Diffractometer operator:     | A. A. Heidecker                   |
| Scanspeed                    | 1-8 s per frame                   |
| dx                           | 40 mm                             |
| Frames:                      | 3689 measured in 12 XYZ data sets |
| phi-scans with delta phi     | 0.5/1.0                           |
| omega-scans with delta omega | 0.5                               |

### Crystal Data:

|                                                                                      |                                                                        |
|--------------------------------------------------------------------------------------|------------------------------------------------------------------------|
| Chemical formula [C <sub>43</sub> H <sub>39</sub> NO <sub>2</sub> P <sub>2</sub> Ru] | Density (calculated) = <u>1.457</u> g/cm <sup>3</sup>                  |
| Formula weight <u>764.76</u>                                                         | Absorption coefficient = <u>0.581</u> mm <sup>-1</sup>                 |
| <u>monoclinic, C 2/c</u>                                                             | <u>Mo K<math>\alpha</math></u> radiation, $\lambda =$ <u>0.71073</u> Å |
| $a =$ <u>29.656(5)</u> Å $\alpha = 90^\circ$                                         | Cell parameters from <u>188606</u> reflections                         |
| $b =$ <u>9.7750(17)</u> Å $\beta = 106.902(5)^\circ$                                 | $\theta =$ <u>1.88-27.48</u> °                                         |
| $c =$ <u>25.141(4)</u> Å $\gamma = 90^\circ$                                         | $T =$ <u>100(2)</u> K                                                  |
| $V =$ <u>6973.2(19)</u> Å <sup>3</sup>                                               | <u>clear light yellow-orange plate</u>                                 |
| $Z =$ <u>8</u>                                                                       | <u>0.030 x 0.132 x 0.398</u> mm                                        |
| $F(000) =$ <u>3152</u>                                                               |                                                                        |

### Data collection:

|                                                    |                                                                                            |
|----------------------------------------------------|--------------------------------------------------------------------------------------------|
| <u>Bruker D8 Venture Duo IMS</u><br>diffractometer | <u>8003</u> independent reflections                                                        |
| Radiation source: <u>TXS rotating anode</u>        | <u>7248</u> reflections with $I > 2\sigma(F^2)$                                            |
| <u>Helios optic monochromator</u>                  | $R_{\text{int}} =$ <u>0.0966</u>                                                           |
| Theta range for data collection                    | $\theta_{\text{max}} =$ <u>27.48</u> °, $\theta_{\text{min}} =$ <u>1.88</u> °              |
| Index ranges                                       | <u>-38</u> ≤ $h$ ≤ <u>38</u> , <u>-12</u> ≤ $k$ ≤ <u>12</u> , <u>-32</u> ≤ $l$ ≤ <u>32</u> |

Absorption correction

Multi-Scan, SADABS 2016/2, Bruker

Max. and min. transmission:

0.9830 and 0.8020

188606 measured reflections

Coverage of independent reflections = 100.0%

Data refinement:

Refinement method

Full-matrix least-squares on  $F^2$

Refinement program

SHELXL-2018/3 (Sheldrick, 2018)

Structure solution technique

direct methods

Structure solution program

SHELXT 2018/2 (Sheldrick, 2018)

Function minimized

$\Sigma w(F_o^2 - F_c^2)^2$

Data / restraints / parameters

8003 / 277 / 587

Final R indices

7248 data;  $I > 2\sigma(I)$  R1 = 0.0501, wR2 = 0.0926

all data R1 = 0.0571, wR2 = 0.0955

$w = 1/[\sigma^2(F_o^2) + 39.9662P]$

Weighting scheme

where  $P = (F_o^2 + 2F_c^2)/3$

$\Delta/\sigma_{\max}$

0.001

Goodness-of-fit on  $F^2$

1.214

Largest diff. peak and hole

0.436 and -1.068 eÅ<sup>-3</sup>

R.M.S. deviation from mean

0.087 eÅ<sup>-3</sup>



### Single Crystal X-Ray Structure Determination of Compound 3 (CCDC 2253560)

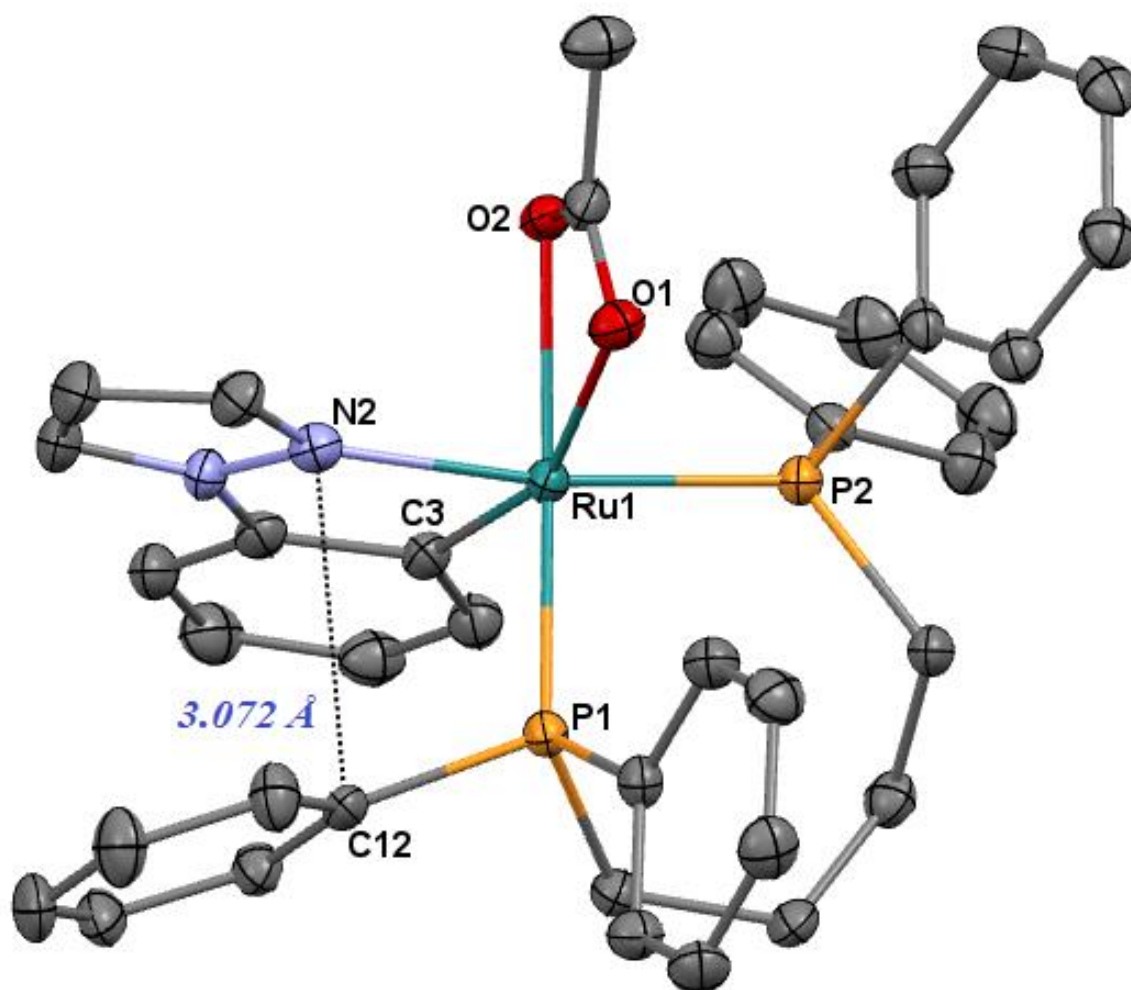

**Figure S72.** ORTEP style plot of compound **3** in the solid state (CCDC 2253560). Ellipsoids are drawn at the 50% probability level. Hydrogen atoms are omitted for clarity. Selected bond lengths [ $\text{\AA}$ ] and angles [ $^\circ$ ]: Ru1-C3 2.054(4), Ru1-N2 2.084(3), Ru1-P1 2.2282(10), Ru1-O2 2.233(2), Ru1-O1 2.247(2), Ru1-P2 2.2756(10), Ru1-C1 2.581(4), P1-C12 1.834(3), C3-Ru1-N2 79.56(13), C3-Ru1-P1 85.38(10), N2-Ru1-P1 92.22(8), C3-Ru1-O2 103.57(11), N2-Ru1-O2 83.44(10), P1-Ru1-O2 169.09(7), C3-Ru1-O1 158.67(11), N2-Ru1-O1 86.02(10), P1-Ru1-O1 110.99(7), O2-Ru1-O1 58.84(9), C3-Ru1-P2 101.12(10), N2-Ru1-P2 171.92(8), P1-Ru1-P2 95.85(3), O2-Ru1-P2 88.59(7), O1-Ru1-P2 91.01(7).

## Single Crystal X-Ray Structure Determination of Compound 3 (CCDC 2253560)

### Detailed Crystallographic Data.

|                              |                                  |
|------------------------------|----------------------------------|
| Diffractometer operator:     | A. A. Heidecker                  |
| Scanspeed                    | 1-10 s per frame                 |
| dx                           | 40 mm                            |
| Frames:                      | 1673 measured in 8 XYZ data sets |
| phi-scans with delta phi     | 0.5/1.0                          |
| omega-scans with delta omega | -0.5/0.5                         |

### Crystal Data:

|                                                                                                    |                                                                        |
|----------------------------------------------------------------------------------------------------|------------------------------------------------------------------------|
| Chemical formula [C <sub>39</sub> H <sub>38</sub> N <sub>2</sub> O <sub>2</sub> P <sub>2</sub> Ru] | Density (calculated) = <u>1.459</u> g/cm <sup>3</sup>                  |
| Formula weight <u>729.72</u>                                                                       | Absorption coefficient = <u>0.606</u> mm <sup>-1</sup>                 |
| <u>Monoclinic, P 21/n</u>                                                                          | <u>Mo K<math>\alpha</math></u> radiation, $\lambda =$ <u>0.71073</u> Å |
| $a =$ <u>9.845(2)</u> Å $\alpha = 90^\circ$                                                        | Cell parameters from <u>58152</u> reflections                          |
| $b =$ <u>17.644(4)</u> Å $\beta = 90.757(7)^\circ$                                                 | $\theta =$ <u>2.13-25.36</u> °                                         |
| $c =$ <u>19.132(4)</u> Å $\gamma = 90^\circ$                                                       | $T =$ <u>100(2)</u> K                                                  |
| $V =$ <u>3323.0(12)</u> Å <sup>3</sup>                                                             | <u>clear green rectangle</u>                                           |
| $Z =$ <u>4</u>                                                                                     | <u>0.081 x 0.089 x 0.105</u> mm                                        |
| $F(000) =$ <u>1504</u>                                                                             |                                                                        |

### Data collection:

|                                                    |                                                                                            |
|----------------------------------------------------|--------------------------------------------------------------------------------------------|
| <u>Bruker D8 Venture Duo IMS</u><br>diffractometer | <u>6080</u> independent reflections                                                        |
| Radiation source: <u>TXS rotating anode</u>        | <u>5164</u> reflections with $I > 2\sigma(F^2)$                                            |
| <u>Helios optic monochromator</u>                  | $R_{\text{int}} =$ <u>0.0920</u>                                                           |
| Theta range for data collection                    | $\theta_{\text{max}} =$ <u>25.36</u> °, $\theta_{\text{min}} =$ <u>2.13</u> °              |
| Index ranges                                       | <u>-11</u> ≤ $h$ ≤ <u>11</u> , <u>-21</u> ≤ $k$ ≤ <u>21</u> , <u>-21</u> ≤ $l$ ≤ <u>23</u> |
| Absorption correction                              | Multi-Scan, <u>SADABS 2016/2, Bruker</u>                                                   |

58152 measured reflections

Coverage of independent reflections = 99.9%

Data refinement:

Refinement method

Full-matrix least-squares on  $F^2$

Refinement program

SHELXL-2018/3 (Sheldrick, 2018)

Structure solution technique

direct methods

Structure solution program

SHELXT 2018/2 (Sheldrick, 2018)

Function minimized

$\Sigma w(F_o^2 - F_c^2)^2$

Data / restraints / parameters

6080 / 0 / 416

Final R indices

5164 data;  $I > 2\sigma(I)$  R1 = 0.0402, wR2 = 0.0942

all data R1 = 0.0514, wR2 = 0.1008

$w = 1/[\sigma^2(F_o^2) + (0.0400P)^2 + 7.1188P]$

Weighting scheme

where  $P = (F_o^2 + 2F_c^2)/3$

$\Delta/\sigma_{\max}$

0.001

Goodness-of-fit on  $F^2$

1.060

Largest diff. peak and hole

1.125 and -0.687 eÅ<sup>-3</sup>

R.M.S. deviation from mean

0.094 eÅ<sup>-3</sup>

Single Crystal X-Ray Structure Determination of Compound 4 (CCDC 2253558).

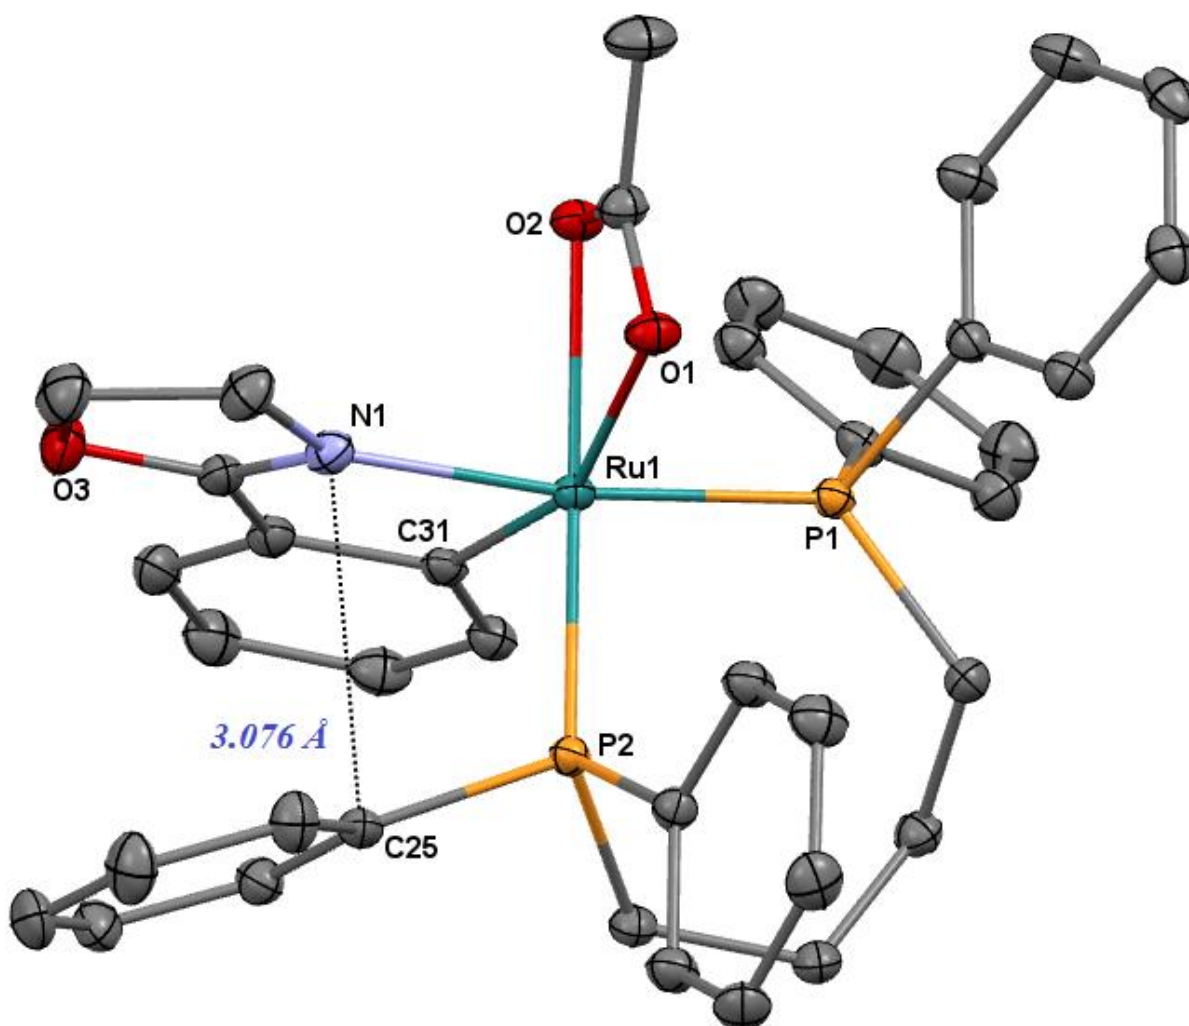

**Figure S73.** ORTEP style plot of compound 4 in the solid state (CCDC 2253558). Ellipsoids are drawn at the 50% probability level. Hydrogen atoms are omitted for clarity. Selected bond lengths [ $\text{\AA}$ ] and angles [ $^\circ$ ]: Ru1-C31 2.0514(13), Ru1-N1 2.1104(11), Ru1-O2 2.2160(9), Ru1-P2 2.2271(4), Ru1-O1 2.2453(10), Ru1-P1 2.2635(4), C31-Ru1-N1 79.34(5), C31-Ru1-O2 103.49(4), N1-Ru1-O2 83.25(4), C31-Ru1-P2 86.49(4), N1-Ru1-P2 92.80(3), O2-Ru1-P2 168.31(3), C31-Ru1-O1 158.95(4), N1-Ru1-O1 86.57(4), O2-Ru1-O1 58.97(3), P2-Ru1-O1 109.94(3), C31-Ru1-P1 100.24(4), N1-Ru1-P1 171.64(3), O2-Ru1-P1 88.77(3), P2-Ru1-P1 95.510(13), O1-Ru1-P1 91.44(3).

## Single Crystal X-Ray Structure Determination of Compound 4 (CCDC 2253558)

### Detailed Crystallographic Data.

|                              |                                   |
|------------------------------|-----------------------------------|
| Diffractometer operator:     | A. A. Heidecker                   |
| Scanspeed                    | 1-4 s per frame                   |
| dx                           | 40 mm                             |
| Frames:                      | 3904 measured in 13 XYZ data sets |
| phi-scans with delta phi     | -0.5/1.0                          |
| omega-scans with delta omega | -0.5/0.5                          |

### Crystal Data:

|                                                                                      |                                                                        |
|--------------------------------------------------------------------------------------|------------------------------------------------------------------------|
| Chemical formula [C <sub>39</sub> H <sub>39</sub> NO <sub>3</sub> P <sub>2</sub> Ru] | Density (calculated) = <u>1.478</u> g/cm <sup>3</sup>                  |
| Formula weight <u>732.72</u>                                                         | Absorption coefficient = <u>0.613</u> mm <sup>-1</sup>                 |
| <u>monoclinic, P 21/n</u>                                                            | <u>Mo K<math>\alpha</math></u> radiation, $\lambda =$ <u>0.71073</u> Å |
| $a =$ <u>9.8933(6)</u> Å $\alpha = 90^\circ$                                         | Cell parameters from <u>209391</u> reflections                         |
| $b =$ <u>17.5880(9)</u> Å $\beta = 91.121(2)^\circ$                                  | $\theta =$ <u>2.15-27.88</u> °                                         |
| $c =$ <u>18.9275(12)</u> Å $\gamma = 90^\circ$                                       | $T =$ <u>100(2)</u> K                                                  |
| $V =$ <u>3292.8(3)</u> Å <sup>3</sup>                                                | <u>clear yellow fragment</u>                                           |
| $Z =$ <u>4</u>                                                                       | <u>0.190 x 0.202 x 0.377</u> mm                                        |
| $F(000) =$ <u>1512</u>                                                               |                                                                        |

### Data collection:

|                                                    |                                                                                            |
|----------------------------------------------------|--------------------------------------------------------------------------------------------|
| <u>Bruker D8 Venture Duo IMS</u><br>diffractometer | <u>7838</u> independent reflections                                                        |
| Radiation source: <u>TXS rotating anode</u>        | <u>7478</u> reflections with $I > 2\sigma(F^2)$                                            |
| <u>Helios optic</u> monochromator                  | $R_{\text{int}} =$ <u>0.0340</u>                                                           |
| Theta range for data collection                    | $\theta_{\text{max}} =$ <u>27.88</u> °, $\theta_{\text{min}} =$ <u>2.15</u> °              |
| Index ranges                                       | <u>-13</u> ≤ $h$ ≤ <u>13</u> , <u>-23</u> ≤ $k$ ≤ <u>23</u> , <u>-24</u> ≤ $l$ ≤ <u>24</u> |
| Absorption correction                              | Multi-Scan, <u>SADABS 2016/2, Bruker</u>                                                   |

209391 measured reflections

Coverage of independent reflections = 100.0%

Data refinement:

Refinement method

Full-matrix least-squares on  $F^2$

Refinement program

SHELXL-2018/3 (Sheldrick, 2018)

Structure solution technique

direct methods

Structure solution program

SHELXT 2018/2 (Sheldrick, 2018)

Function minimized

$\Sigma w(F_o^2 - F_c^2)^2$

Data / restraints / parameters

7838 / 0 / 416

Final R indices

7478 data;  $I > 2\sigma(I)$  R1 = 0.0204, wR2 = 0.0509

all data R1 = 0.0218, wR2 = 0.0519

$w = 1/[\sigma^2(F_o^2) + (0.0213P)^2 + 2.8079P]$

Weighting scheme

where  $P = (F_o^2 + 2F_c^2)/3$

$\Delta/\sigma_{\max}$

0.001

Goodness-of-fit on  $F^2$

1.050

Largest diff. peak and hole

0.369 and -0.466 eÅ<sup>-3</sup>

R.M.S. deviation from mean

0.053 eÅ<sup>-3</sup>

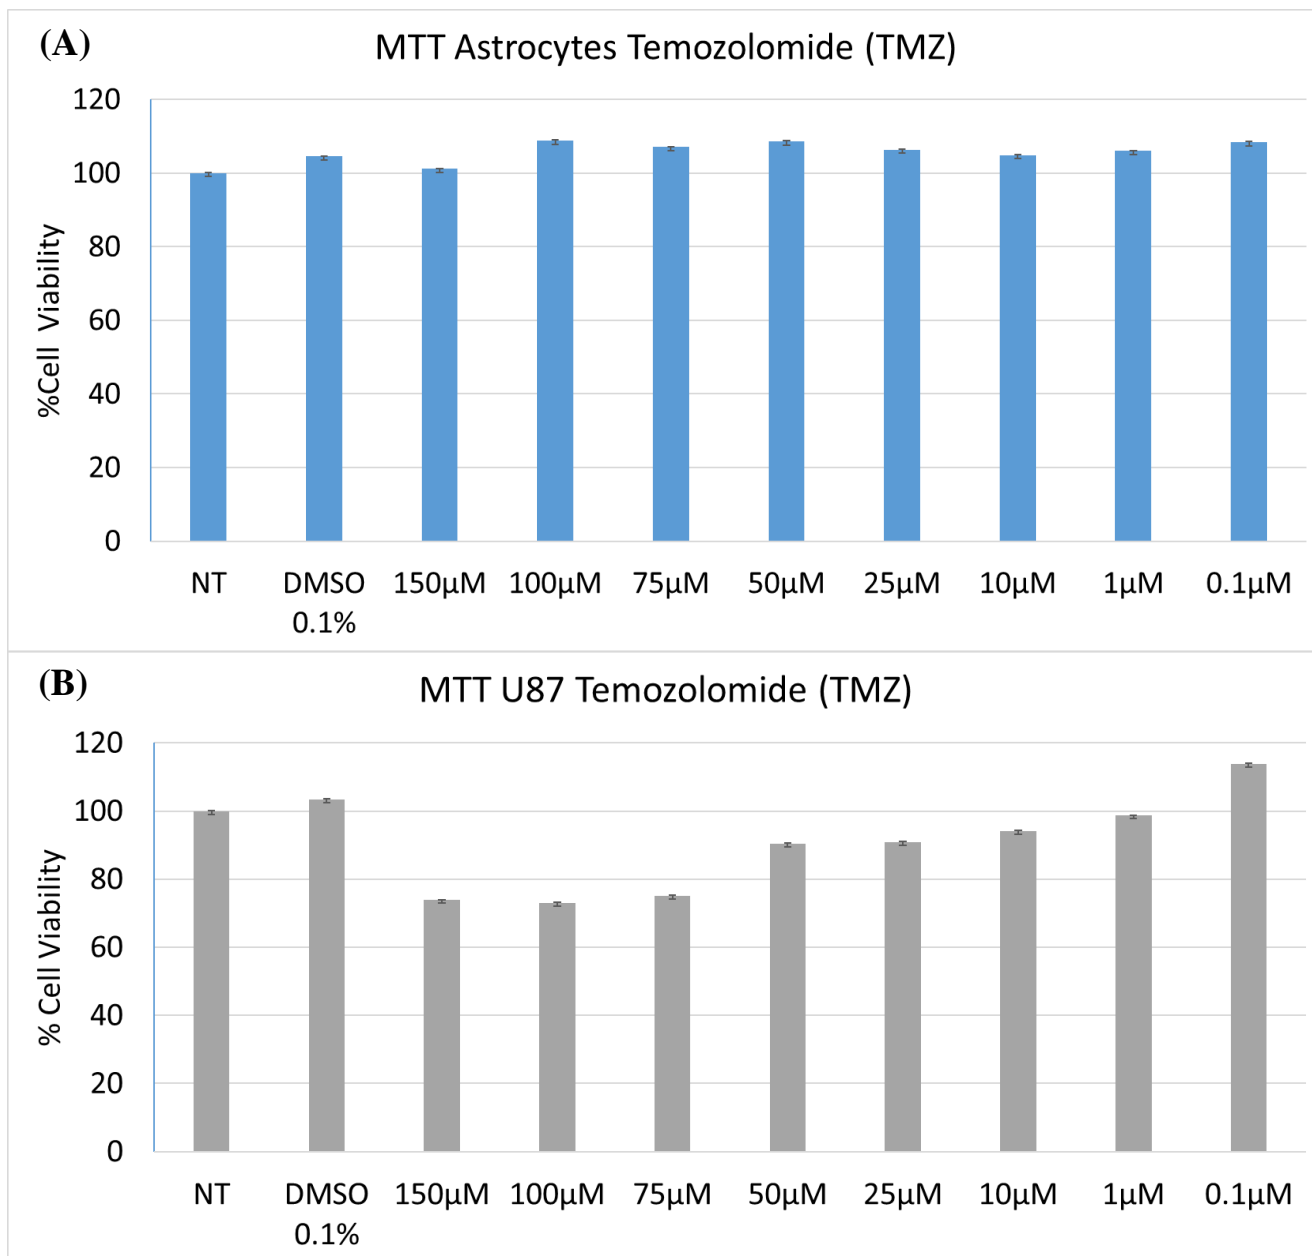

**Figure S74.** Cell viability measured by MTT assay of Astrocytes (A) and U87 MG cells (B) treated with Temozolomide (TMZ) for 72 h.

## References

- 1) (a) K. Gatto, J. D. Reinheimer, K. Shafer, J. T. Gerig, *Org. Magn. Reson*, **1974**, *6*, 577-579. (b) Y. Sarrafi, M. Tajbakhsh, R. Hosseinzadeh, M. Sadatshahabi, K. Alimohammadi, *Synth. Commun.*, **2012**, *42*, 678-685.
- 2) R. Lin, F. Chen, N. Jiao, *Org. Lett.*, **2012**, *14*, 4158-4161.
- 3) (a) G. A. Olah, O. Farooq, S. M. F. Farnia, J. A. Olah, *J. Am. Chem. Soc.*, **1988**, *110*, 2560-2565. (b) H-J. Cristau, A. Bazbouz, P. Morand, E. Torreilles, *Tetrahedron Lett.*, **1986**, *27*, 2965-2966. (c) B. Skillinghaug, C. Skold, J. Rydfjord, F. Svensson, M. Behrends, J. Savmarker, P. J. R. Sjoberg, M. Larhed, *J. Org. Chem.*, **2014**, *79*, 12018-12032.
- 4) D. E. Alonso, S. E. Warren, *J. Chem. Educ.*, **2005**, *82*, 1385-1386.
- 5) A. K. Mishraa, J. N. Moorthy, *Org. Chem. Front.*, **2017**, *4*, 343-349.
- 6) (a) M. Li, B. Li, H.-F. Xia, D. Ye, J. Wu, Y. Shi, *Green Chem.*, **2014**, *16*, 2680-2688. (b) T. Ohkuma, M. Koizumi, H. Doucet, T. Pham, M. Kozawa, K. Murata, E. Katayama, T. Yokozawa, T. Ikariya, R. Noyori, *J. Am. Chem. Soc.*, **1998**, *120*, 13529–13530. (c) T. Vielhaber, C. Topf, *Appl. Catal. A: Gen.*, **2021**, *623*, 118280.
- 7) S. Yadav, R. Gupta, *ACS Sustain. Chem. Eng.*, **2023**, *11*, 8533-8543.
- 8) H. Shimizu, D. Igarashi, W. Kuriyama., Y. Yusa, N. Sayo and T. Saito, *Org. Lett.*, **2007**, *9*, 1655-1657.
- 9) H. Yu, Y. Luo, K. Beverly, J. F. Stoddart, H.-R. Tseng, J. R. Heath, *Angew. Chem. Int. Ed.* **2003**, *42*, 5706-5711.
- 10) *APEX suite of crystallographic software*, APEX4 Version 2021-10-0, Bruker AXS Inc., Madison, Wisconsin, USA, **2021**.
- 11) *SAINT*, Version 8.40A and *SADABS*, Version 2016/2, Bruker AXS Inc., Madison, Wisconsin, USA, **2016/2019**.
- 12) G. M. Sheldrick, *Acta Crystallogr. Sect. A* **2015**, *71*, 3-8.
- 13) G. M. Sheldrick, *Acta Crystallogr. Sect. C* **2015**, *71*, 3-8.
- 14) C. B. Hübschle, G. M. Sheldrick, B. Dittrich, *J. Appl. Cryst.* **2011**, *44*, 1281-1284
- 15) *International Tables for Crystallography, Vol. C* (Ed.: A. J. Wilson), Kluwer Academic Publishers, Dordrecht, The Netherlands, **1992**, Tables 6.1.1.4 (pp. 500-502), 4.2.6.8 (pp. 219-222), and 4.2.4.2 (pp. 193-199).
- 16) C. F. Macrae, I. J. Bruno, J. A. Chisholm, P. R. Edgington, P. McCabe, E. Pidcock, L. Rodriguez-Monge, R. Taylor, J. van de Streek, P. A. Wood, *J. Appl. Cryst.* **2008**, *41*, 466-470.
- 17) A. L. Spek, *Acta Crystallogr. Sect. D* **2009**, *65*, 148-155.
